# Supplementary material for: Novel 3D Structure Based Model for Activity Prediction and Design of Antimicrobial Peptides
Source: PubMed Central journal article supplement (PMC6060096; doi:10.1038/s41598-018-29566-5), 2018-07-25

# **Novel 3D Structure Based Model for Activity Prediction and Design of Antimicrobial Peptides**

Shicai Liu, Jingxiao Bao, Xingzhen Lao\* and Heng Zheng\*  
*School of Life Science and Technology, China Pharmaceutical University, Nanjing  
210009, China*

\* To whom correspondence should be addressed.

Corresponding author's contact information: Address: China Pharmaceutical University, 24 Tongjiang, Nanjing, 210009, China. Tel: 86-25-83271001, Fax: 86-25-83271249, E-mail: lao@cpu.edu.cn (Xingzhen Lao), zhengh18@hotmail.com (Heng Zheng).

**A**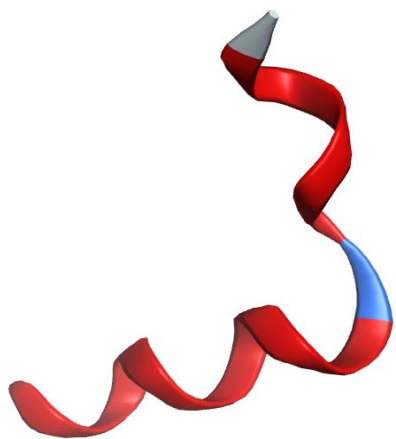**B**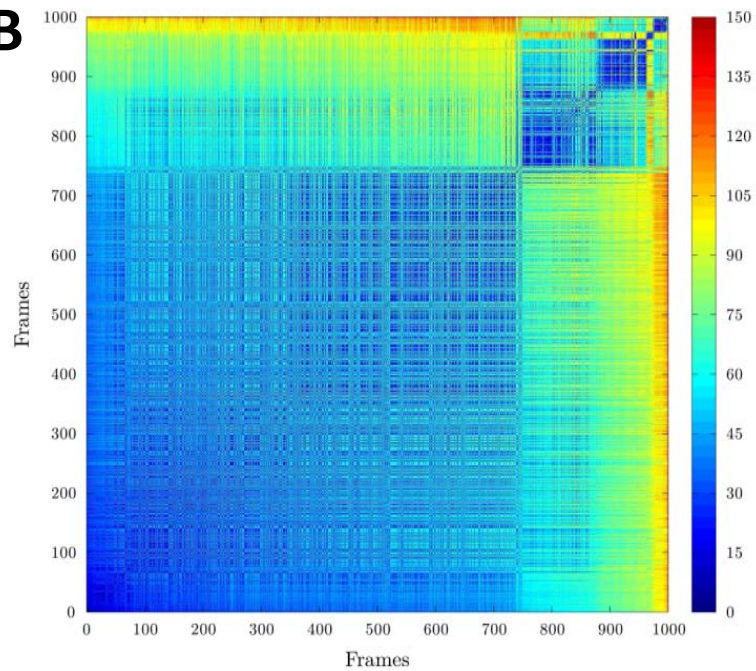**C**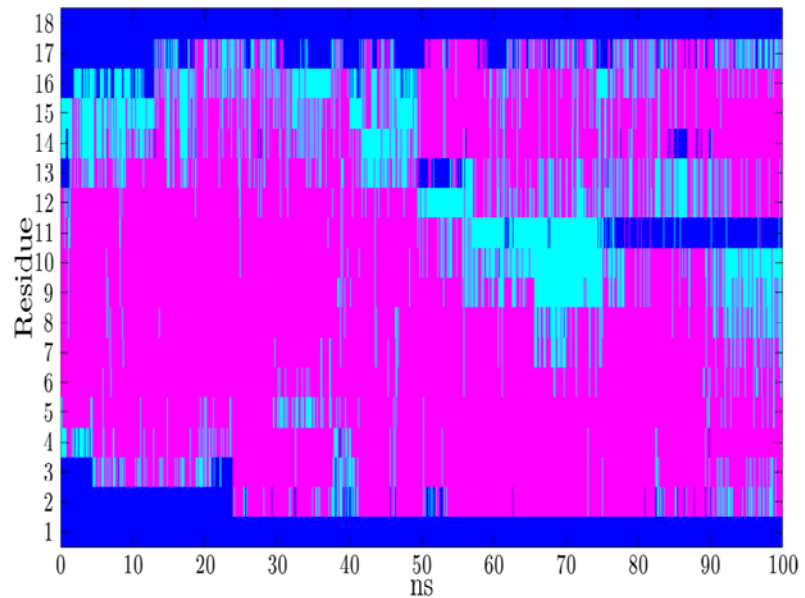

DRAMP00183

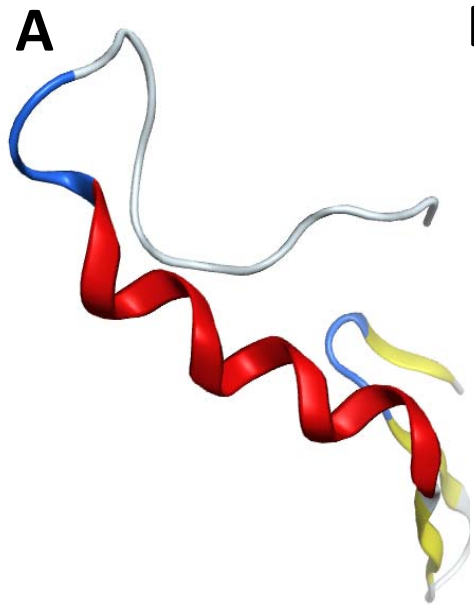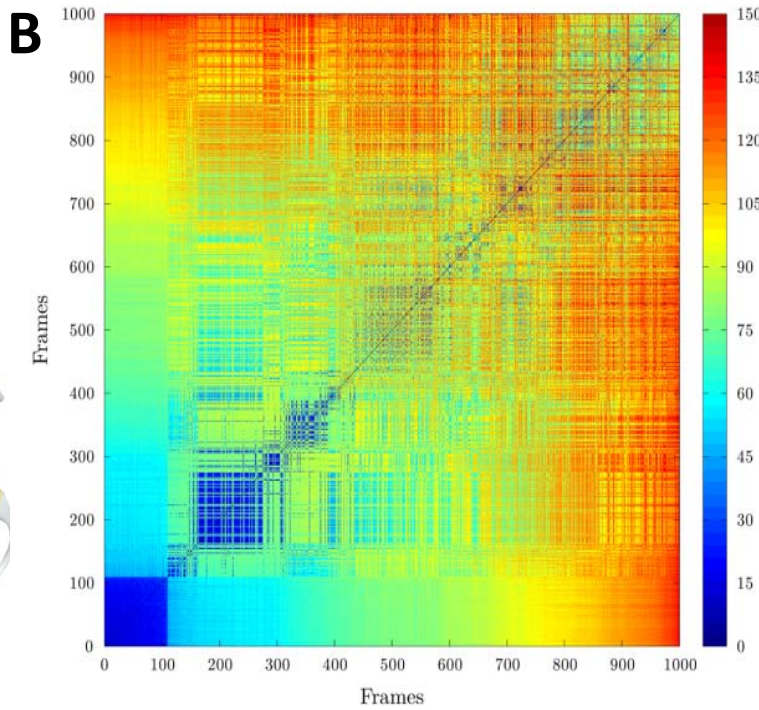

DRAMP00124

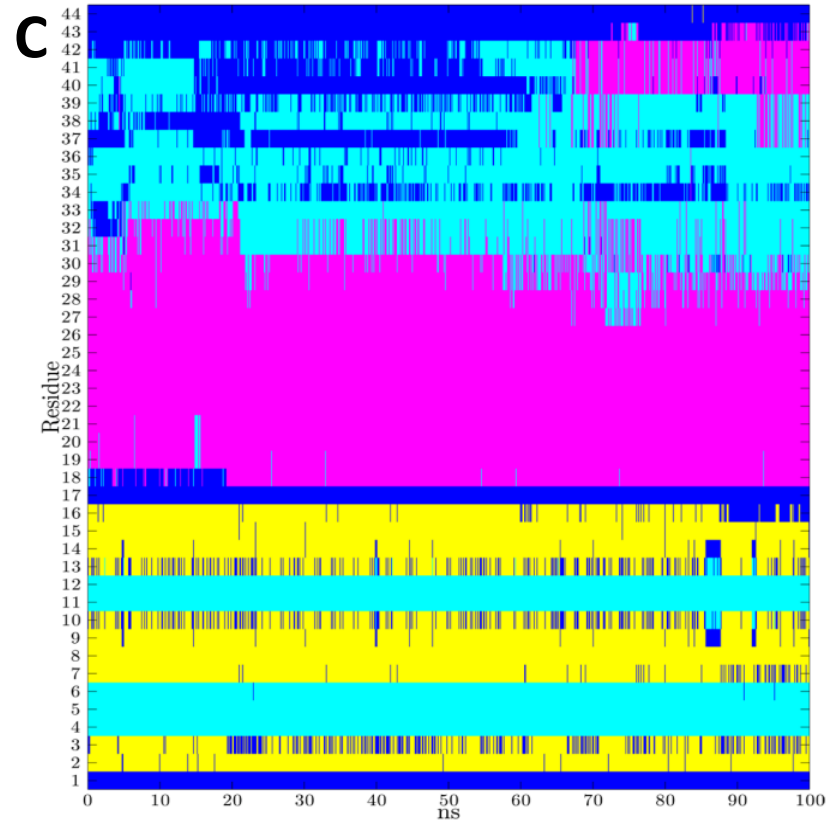

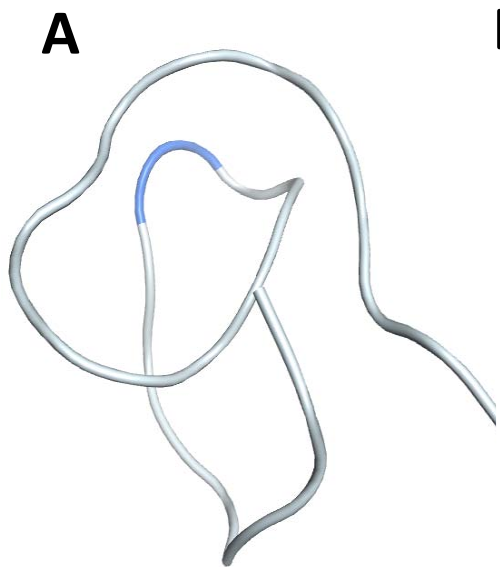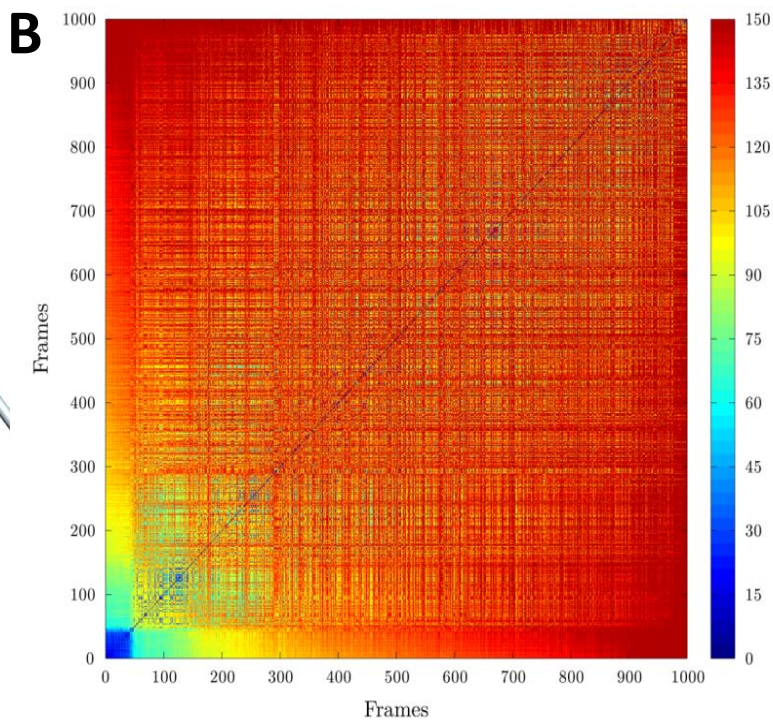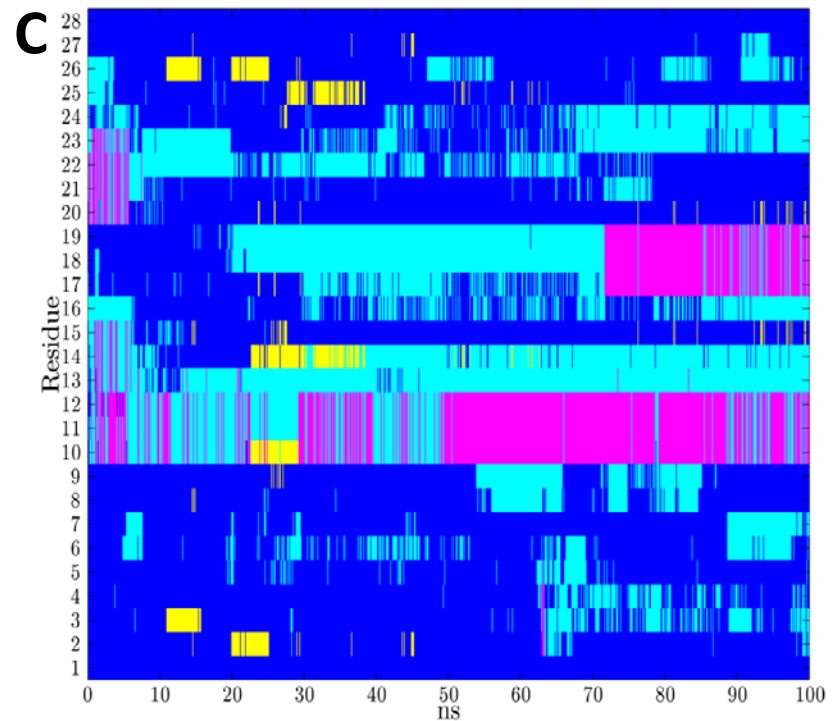



**A**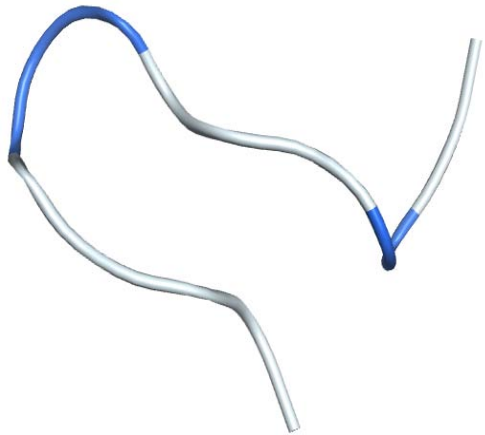**B**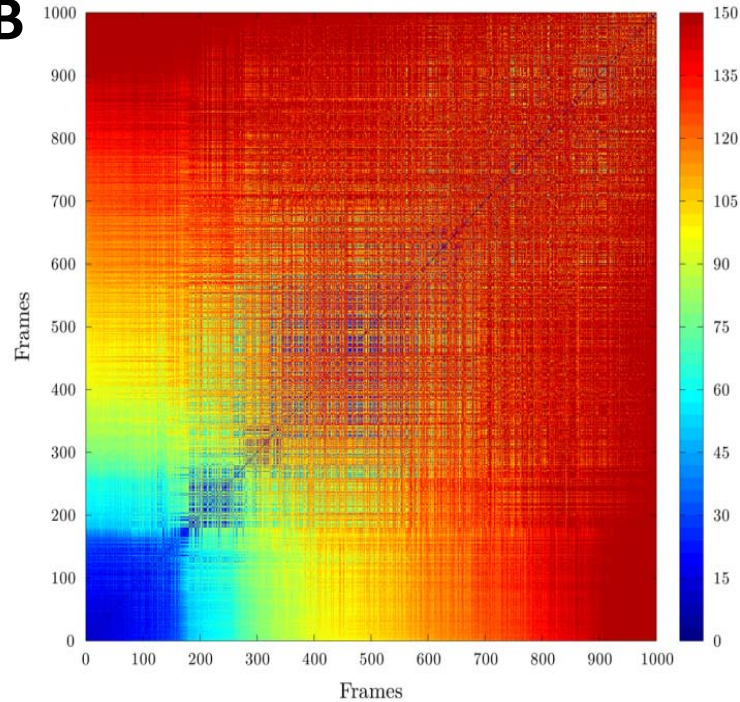

DRAMP18217

**C**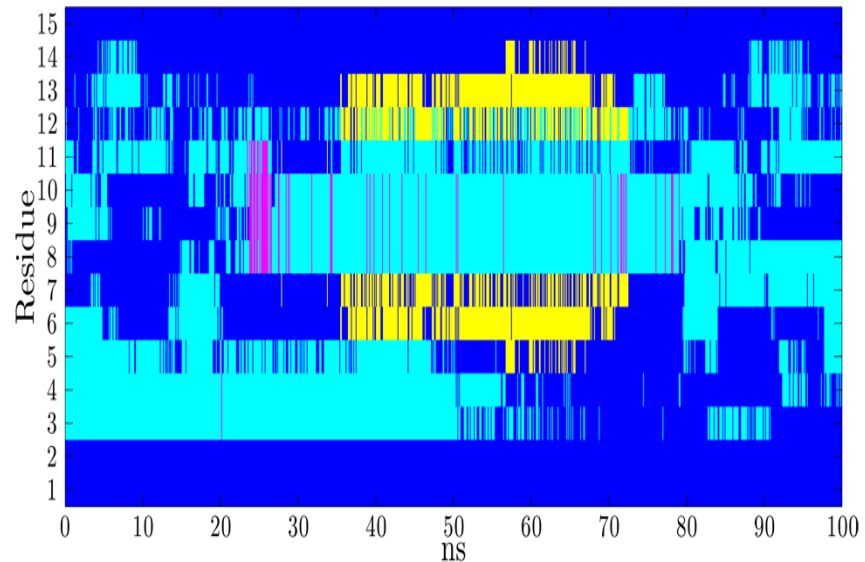

**A**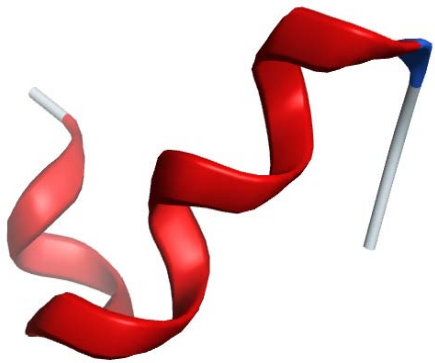**B**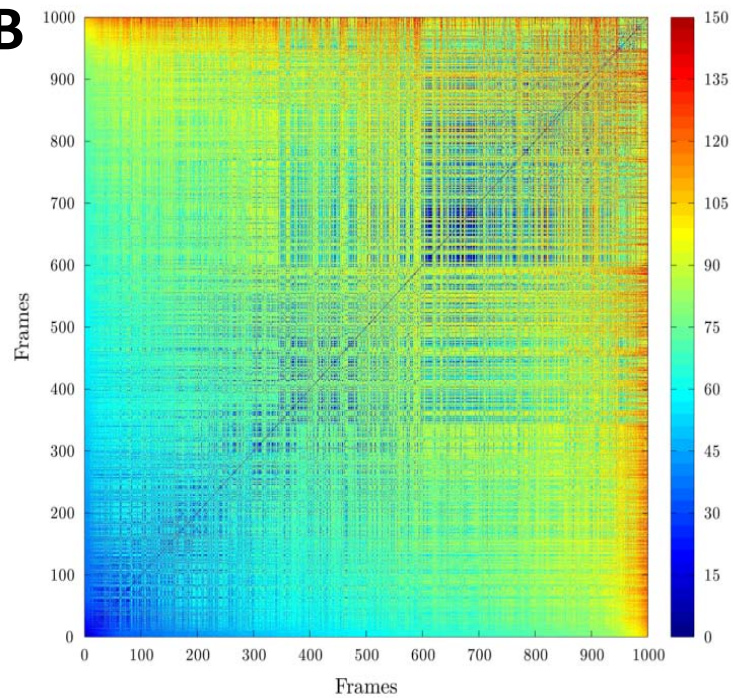**C**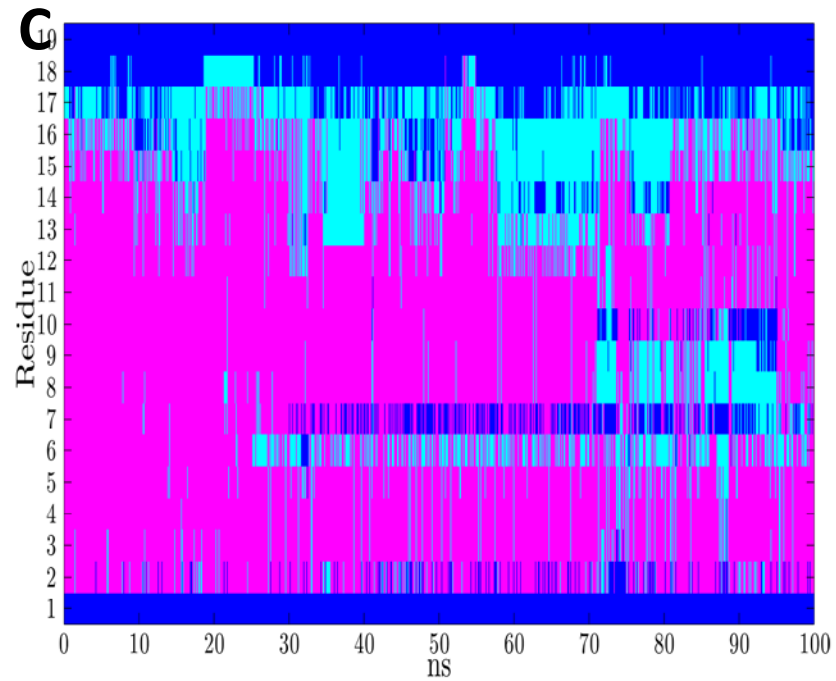

DRAMP18246

**A**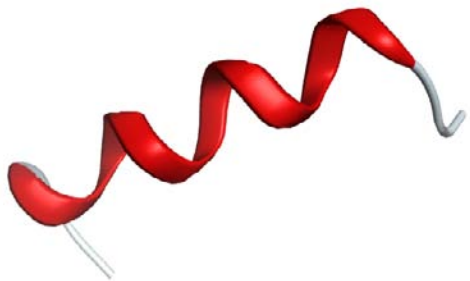**B**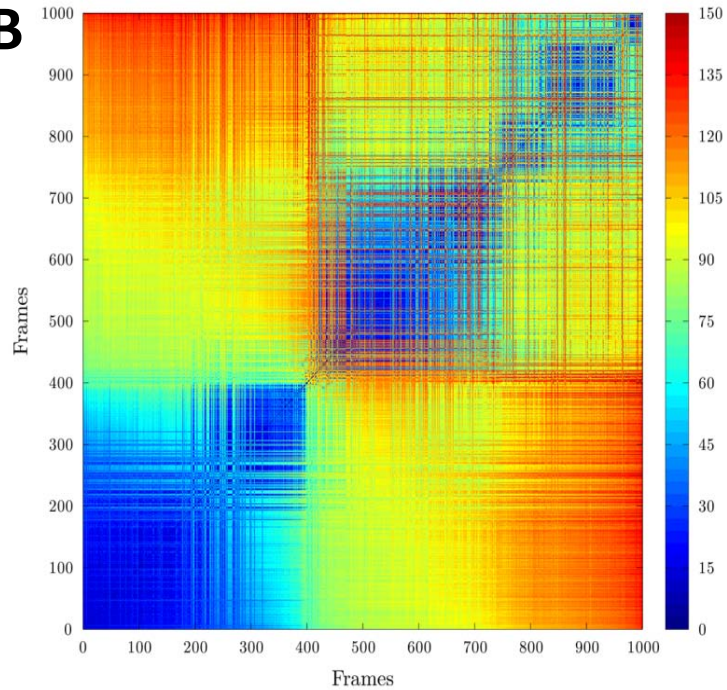**C**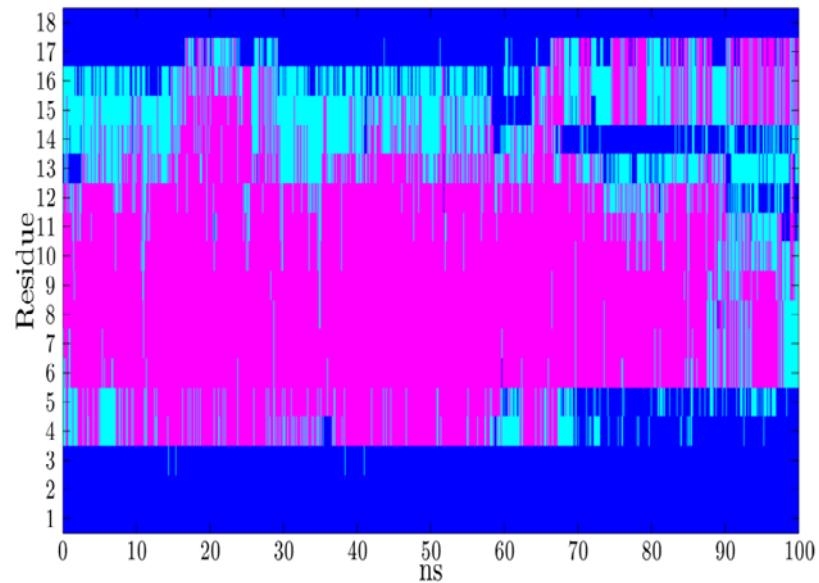

DRAMP00182

**A**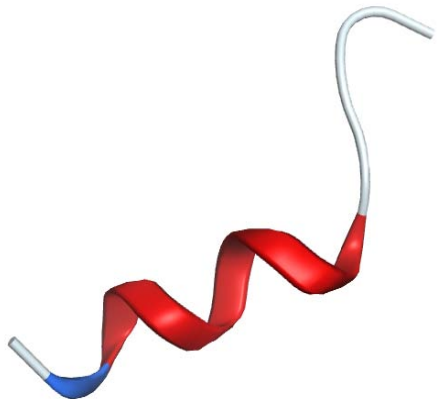**B**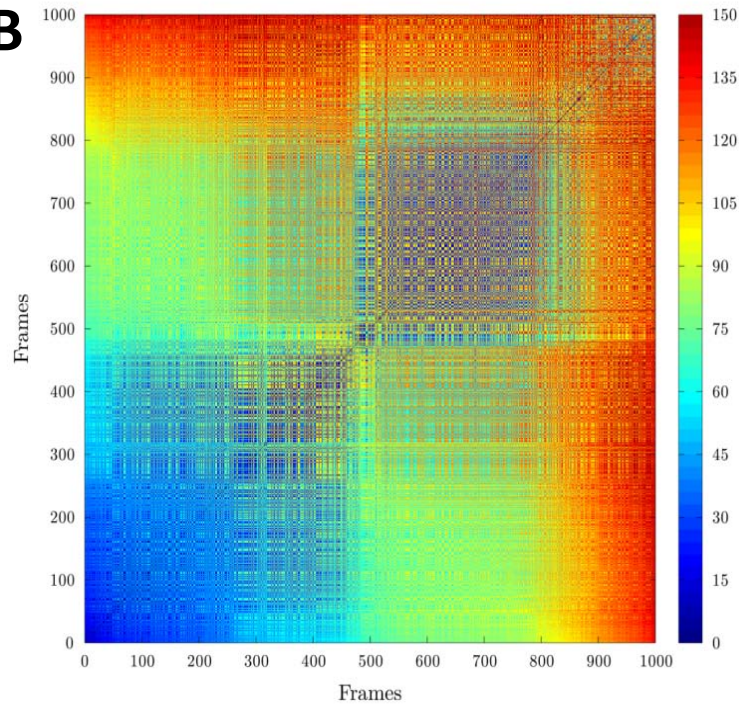**C**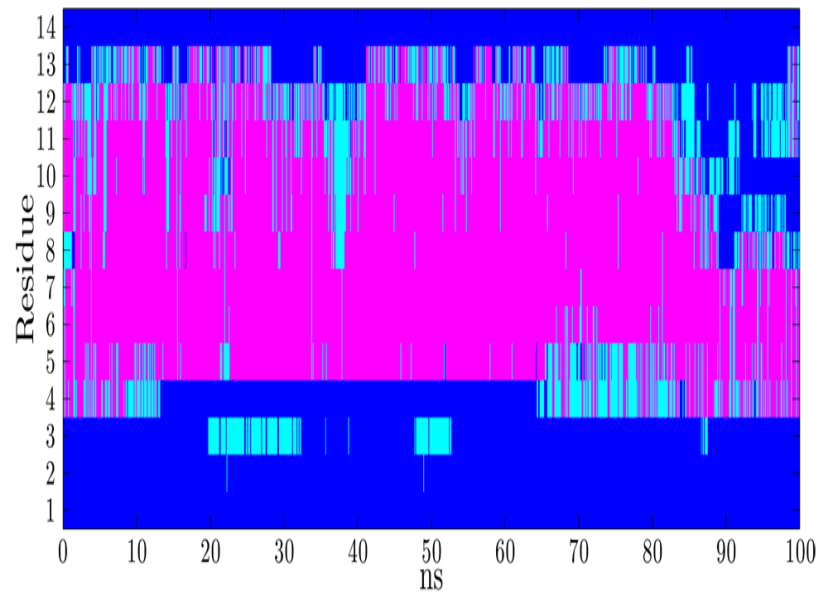

DRAMP00183



**A**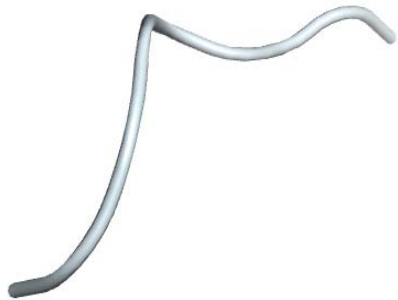**B**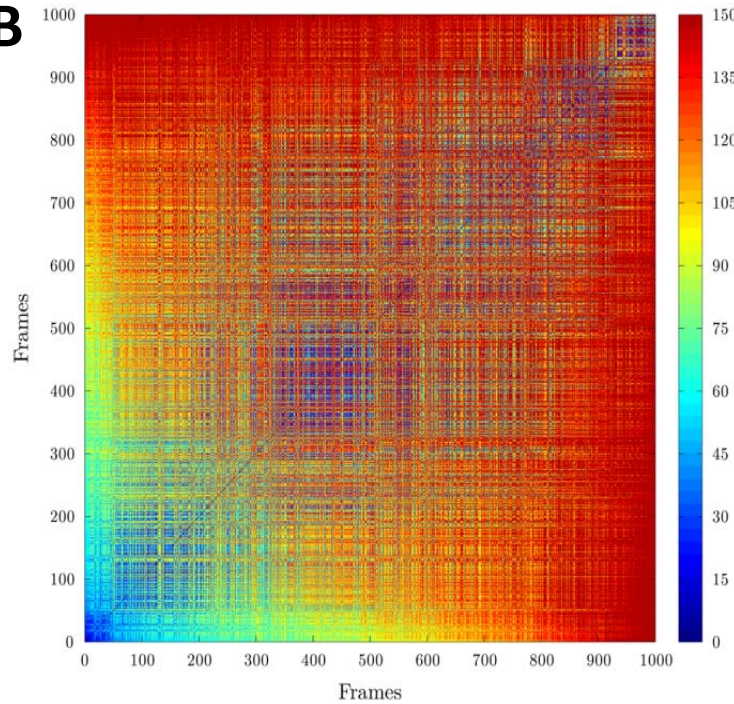**DRAMP18248****C**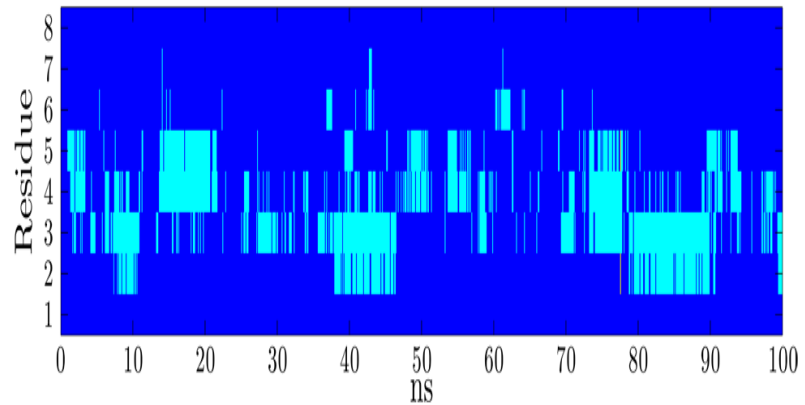



**A**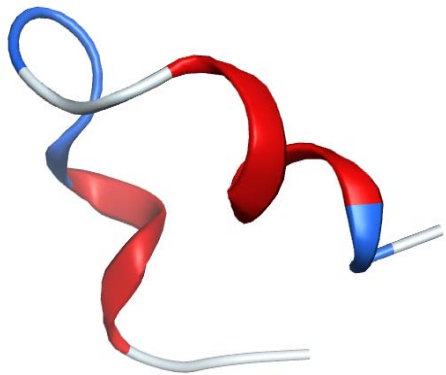**B**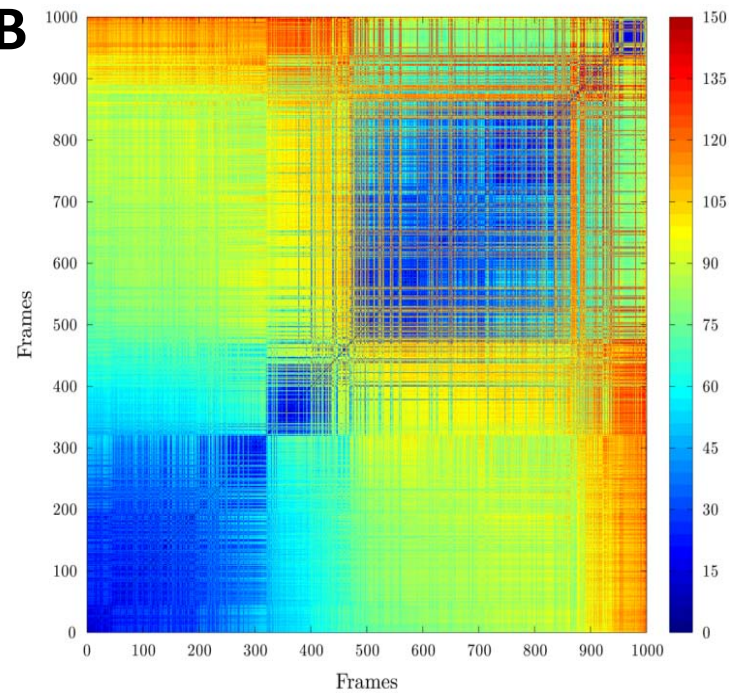**C**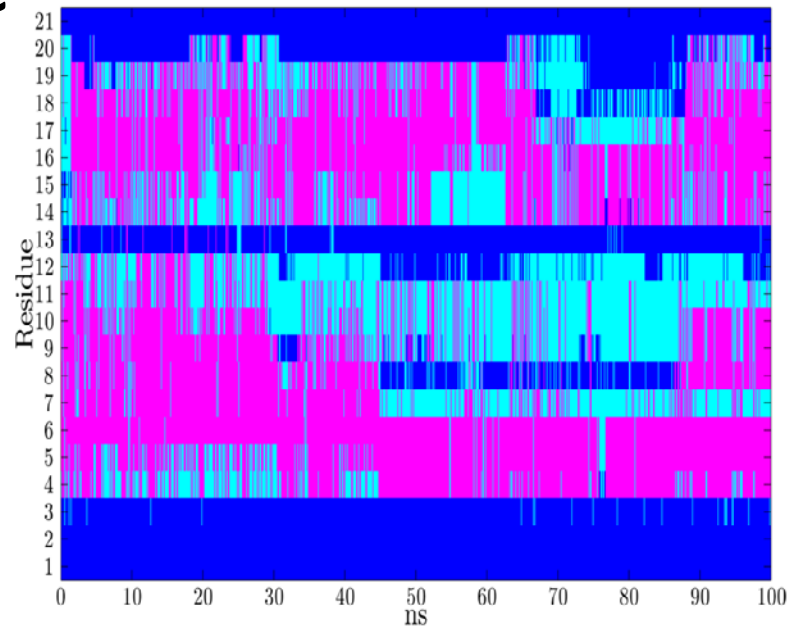

DRAMP18249

**A**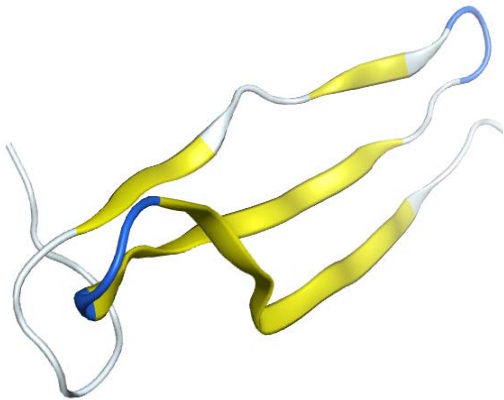**B**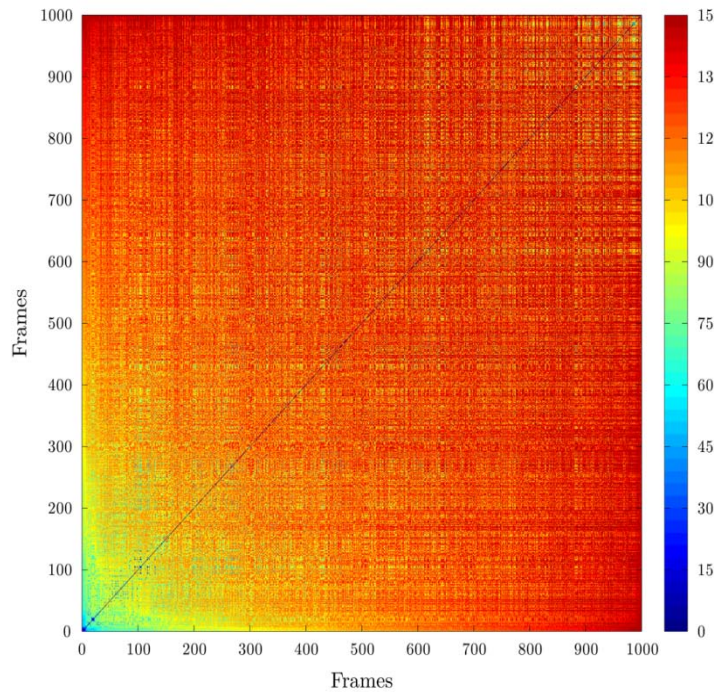

DRAMP18250

**C**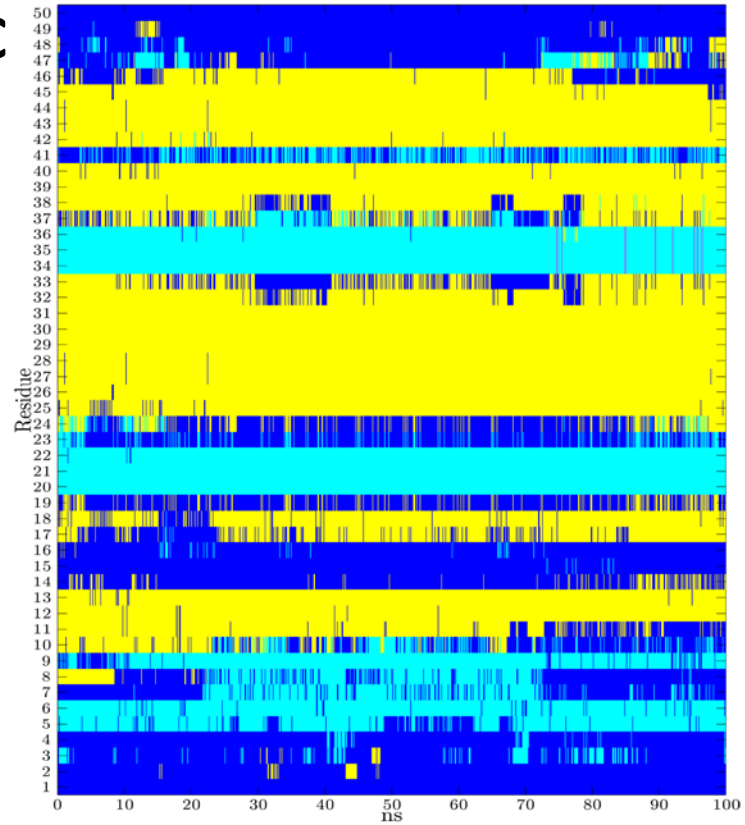

**A**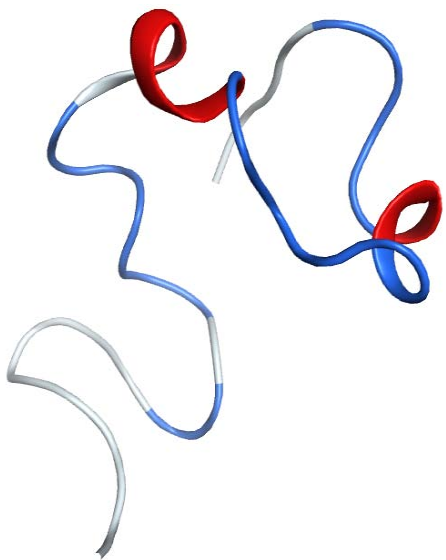**B**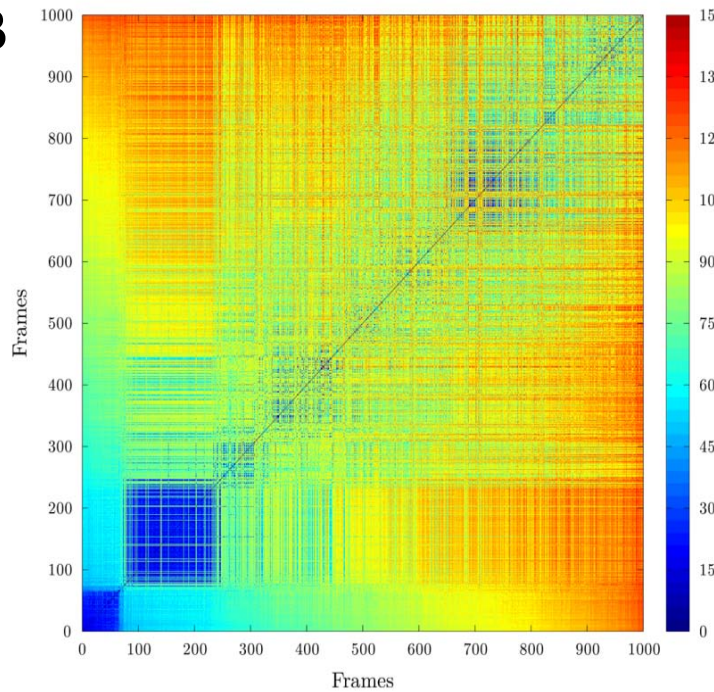

DRAMP00086

**C**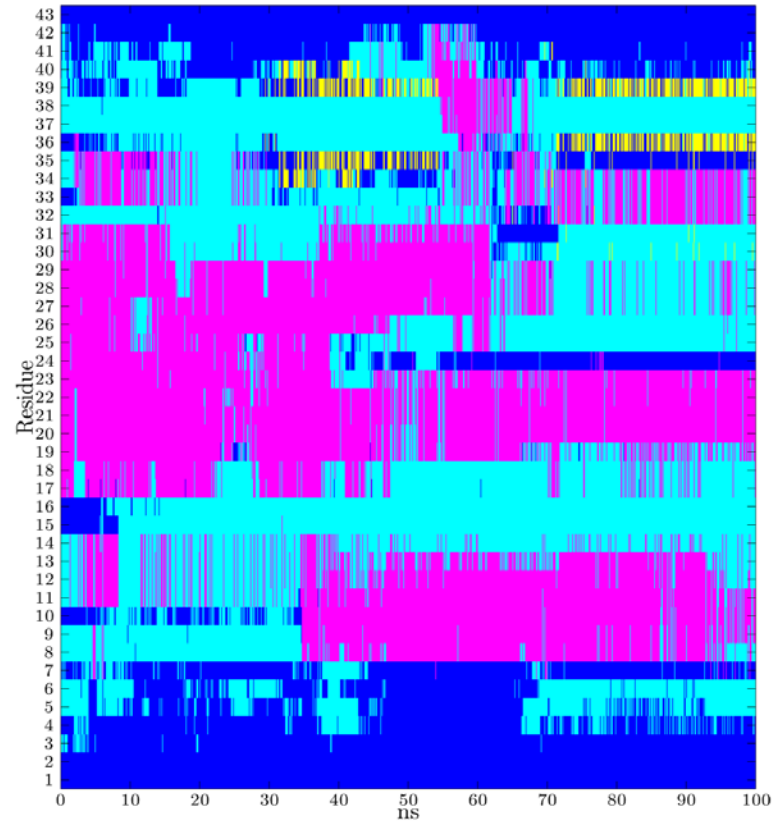

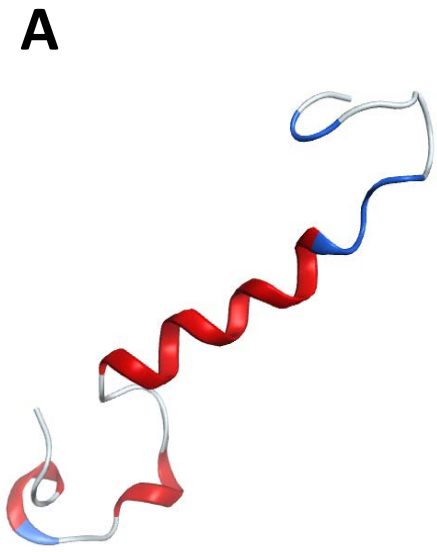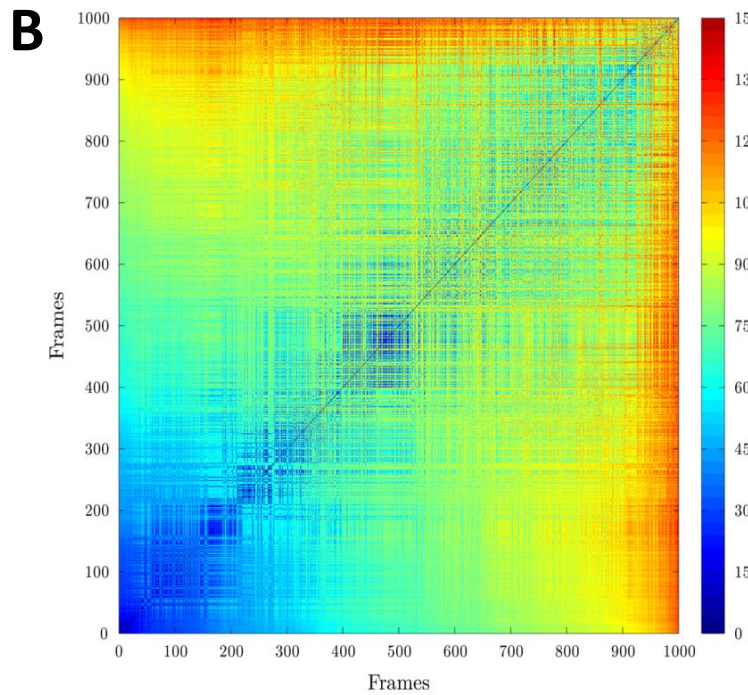

DRAMP00123

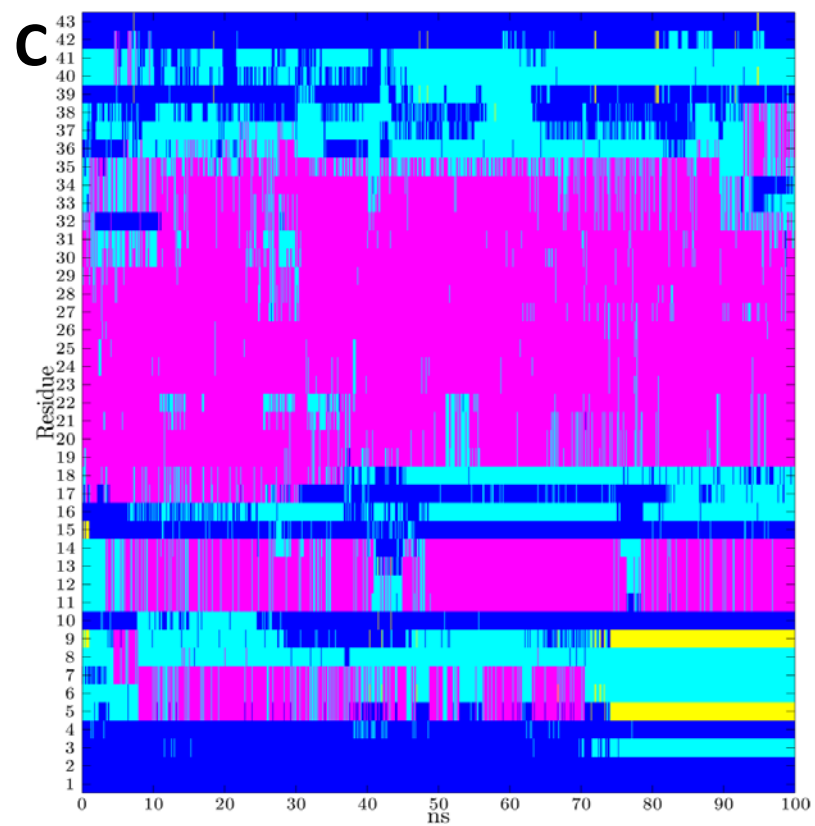



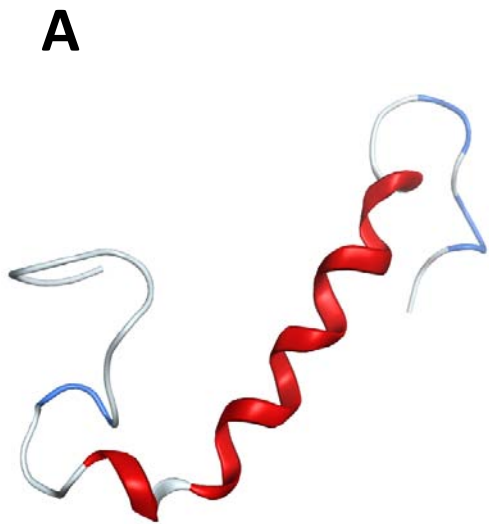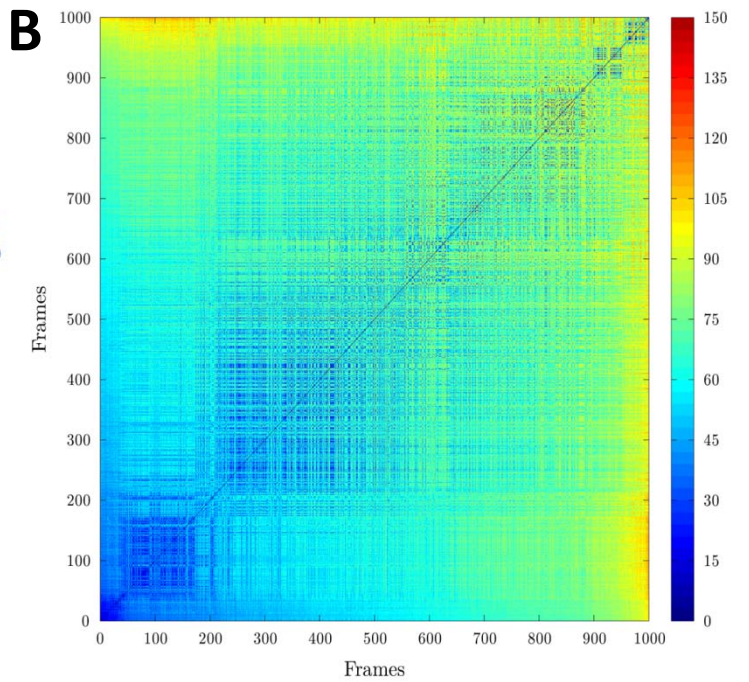

DRAMP00090

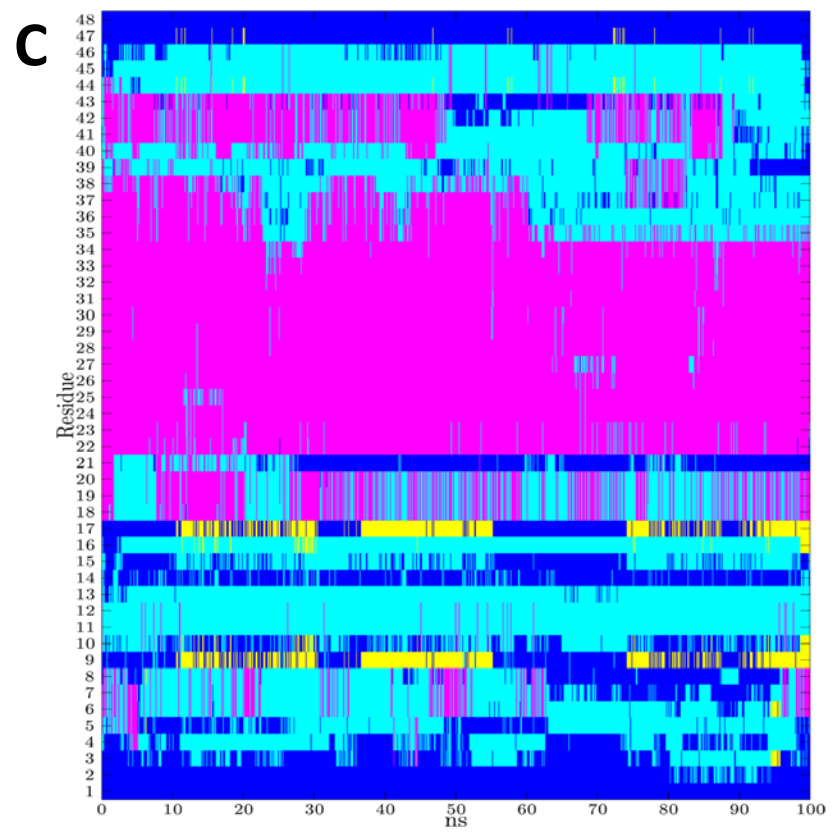



**A**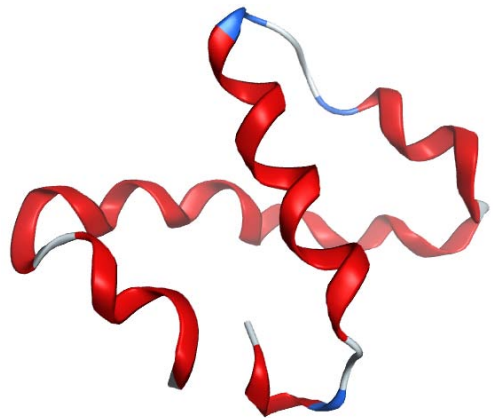**B**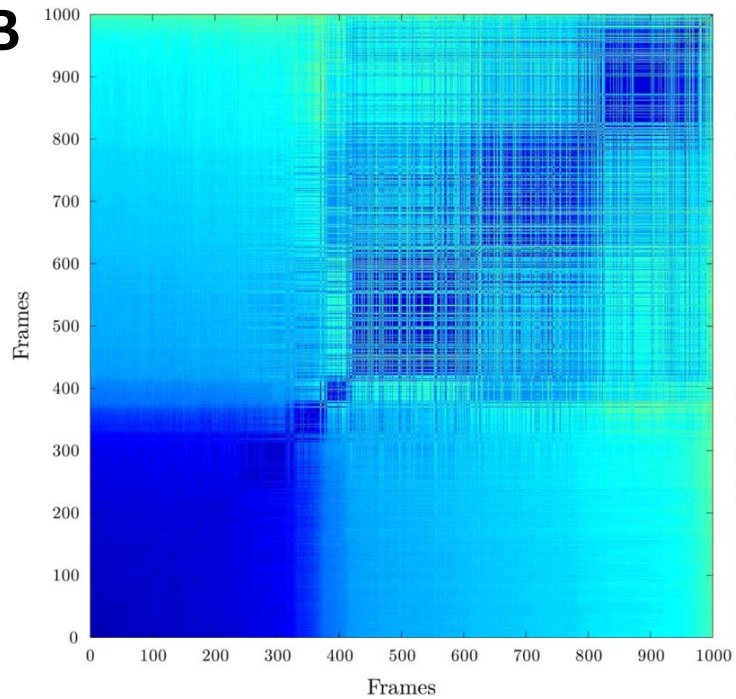

DRAMP00170

**C**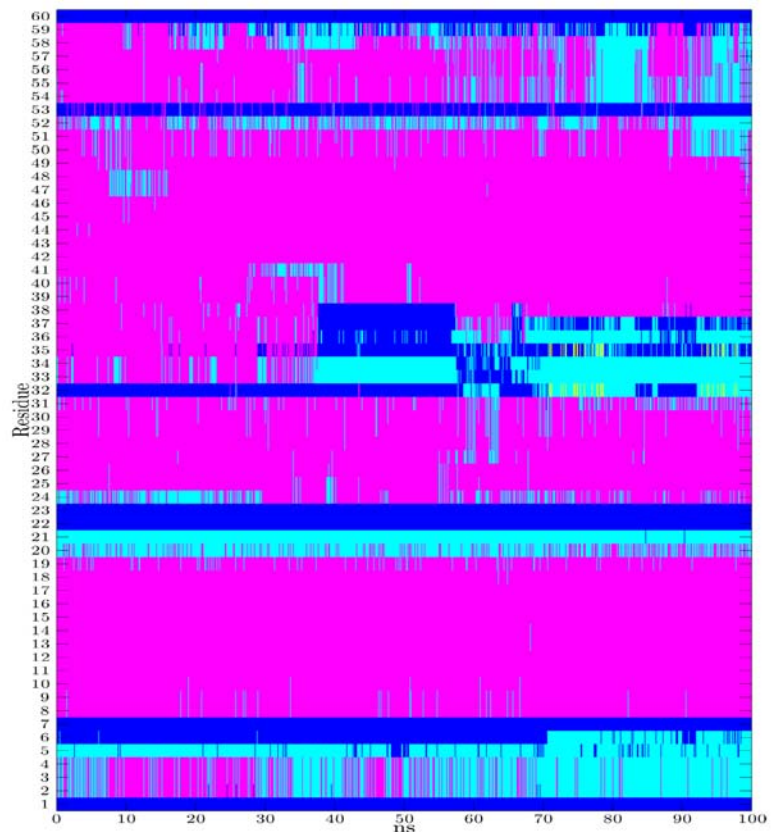

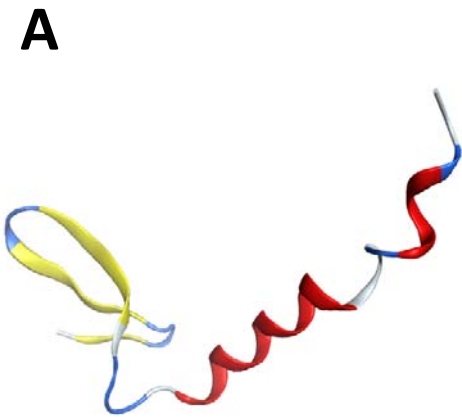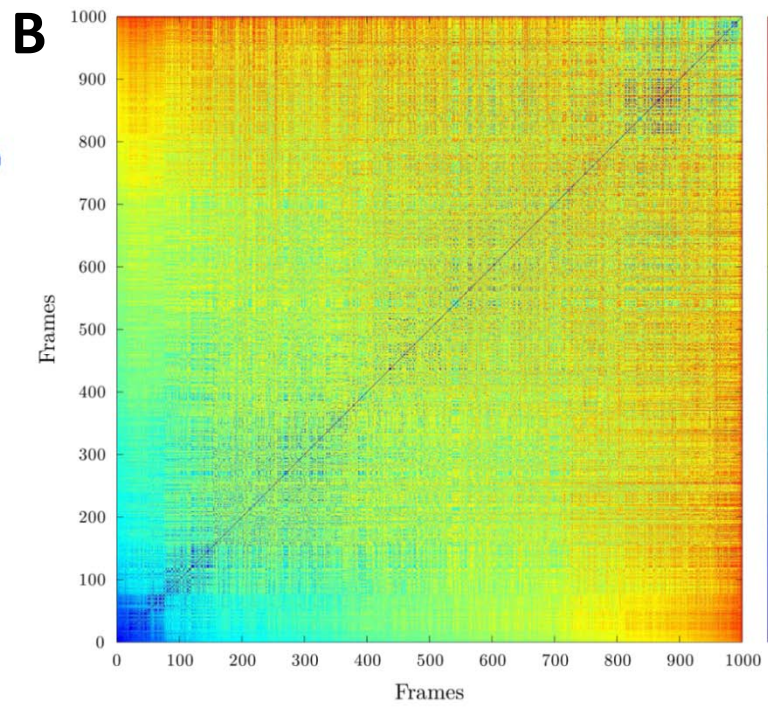

DRAMP00102

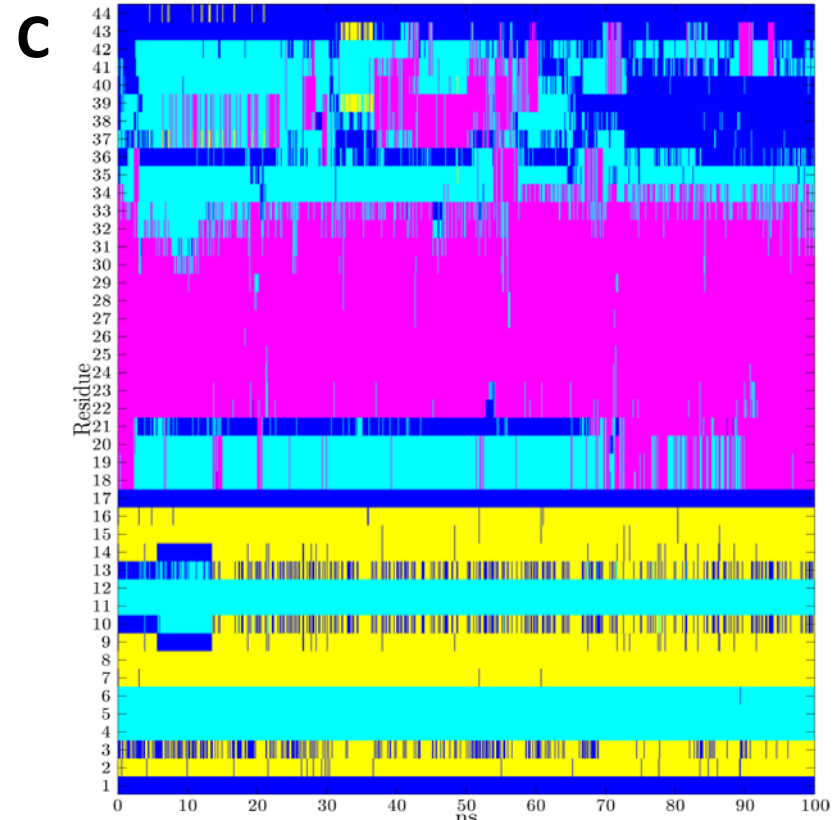

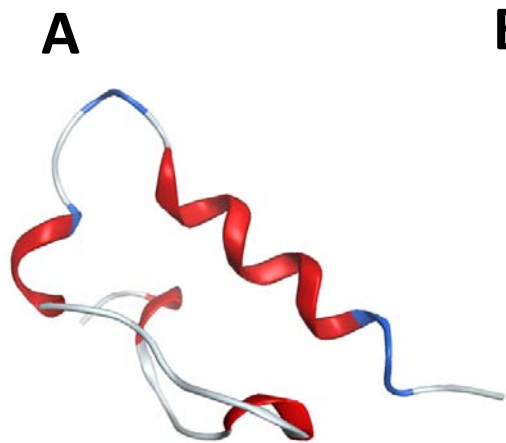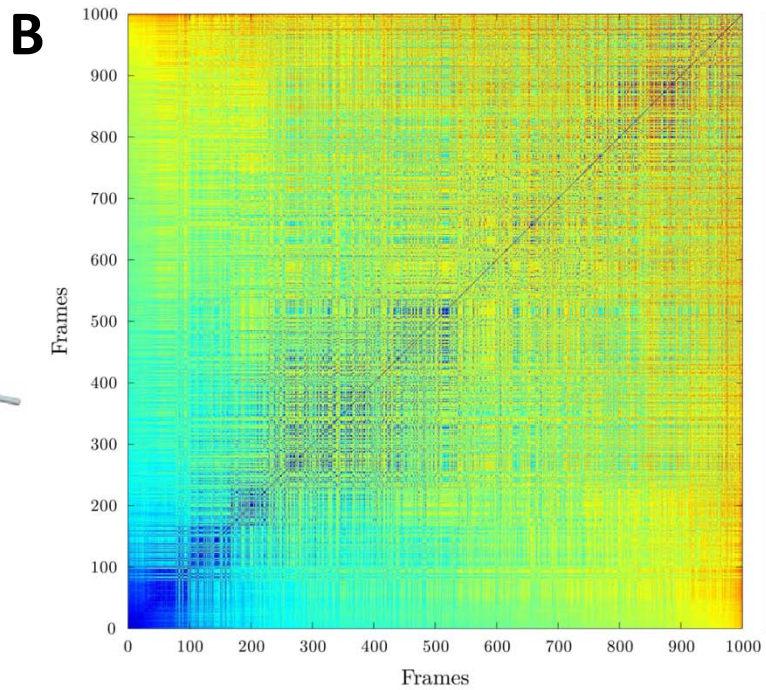

DRAMP00091

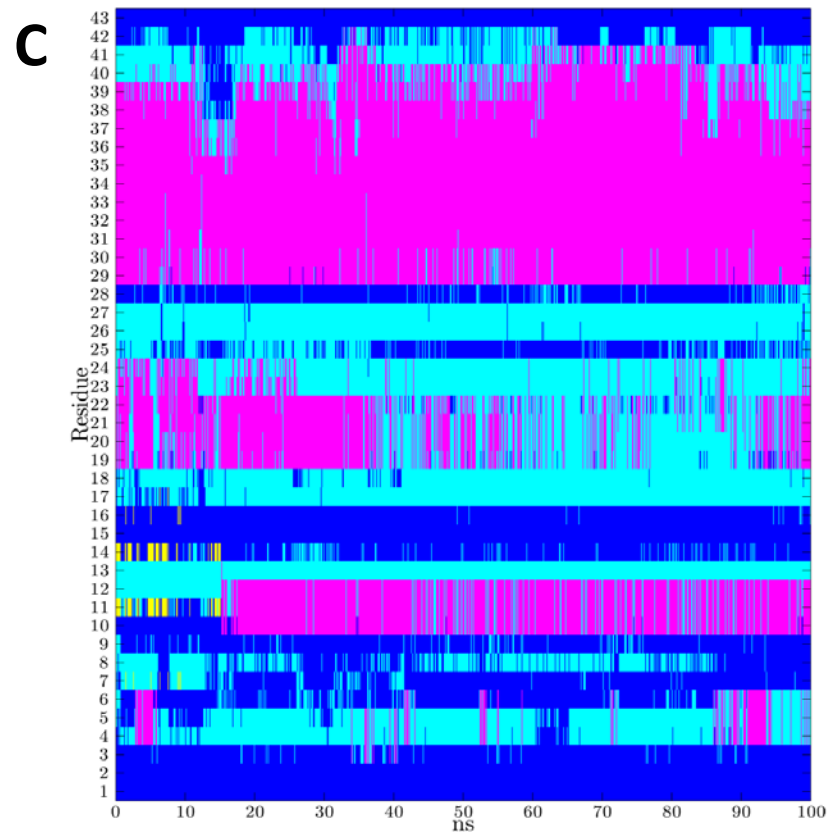



**A**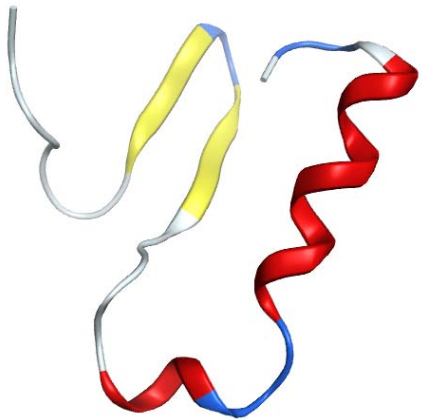**B**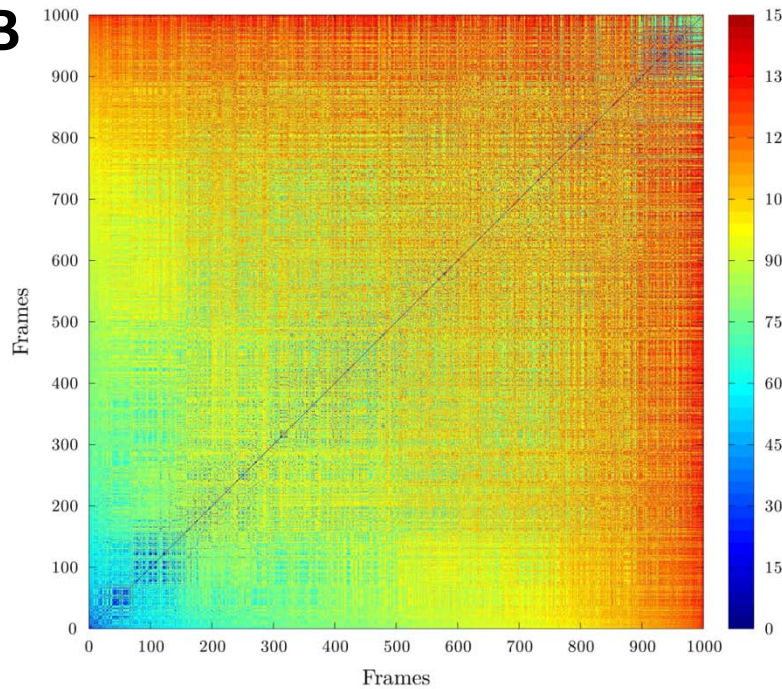

DRAMP00091

**C**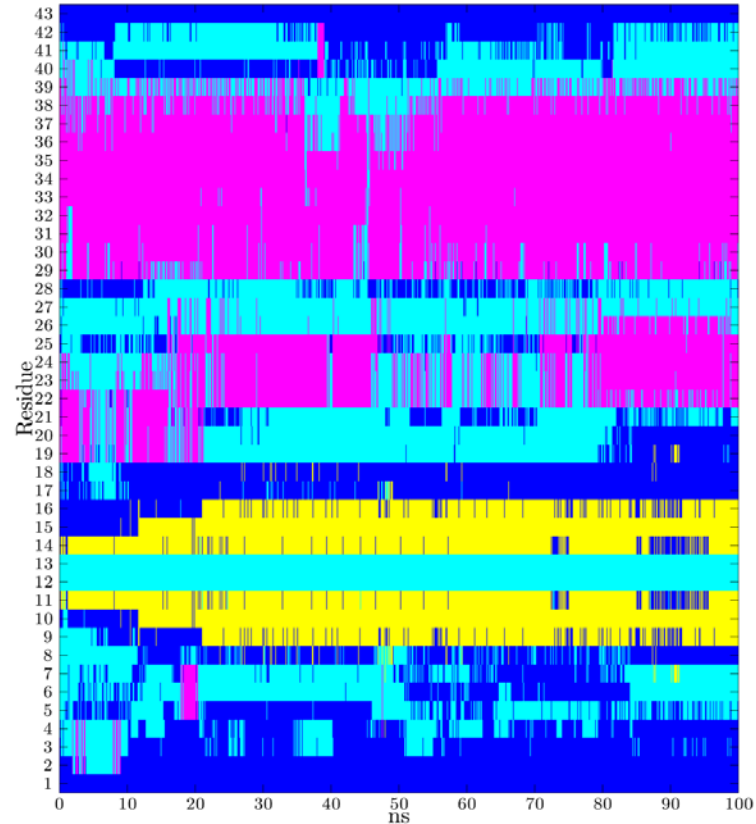

**A**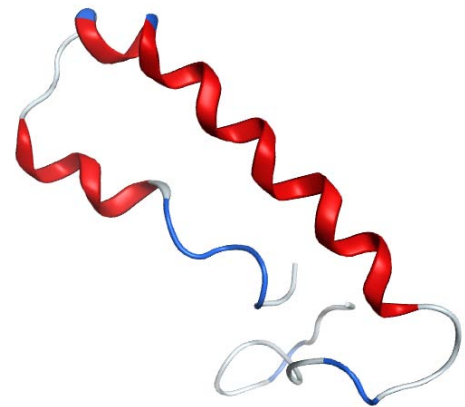**B**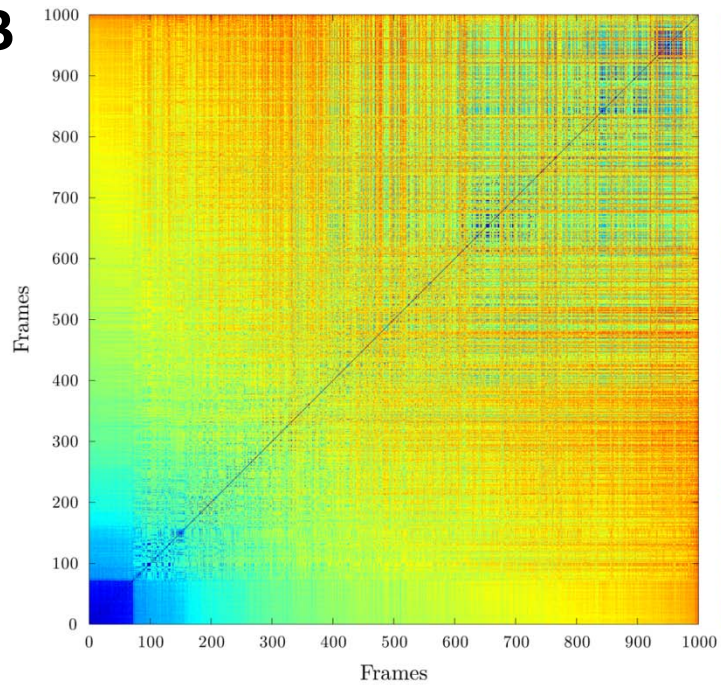

DRAMP00136

**C**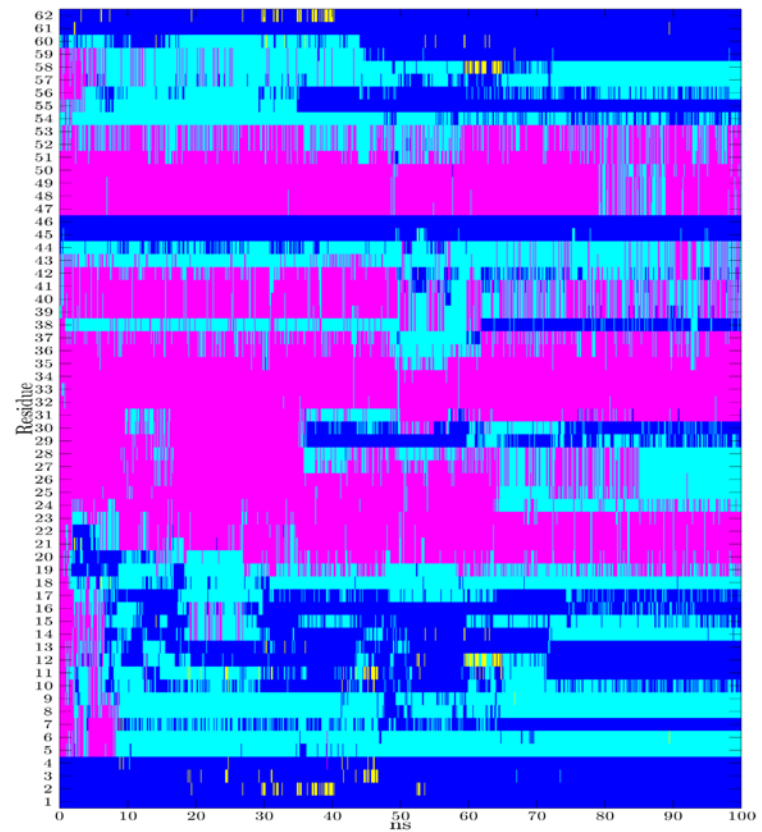



**A**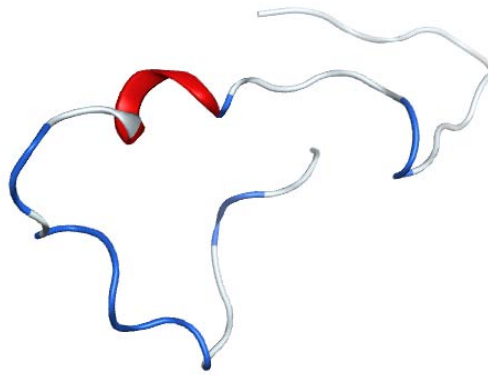**B**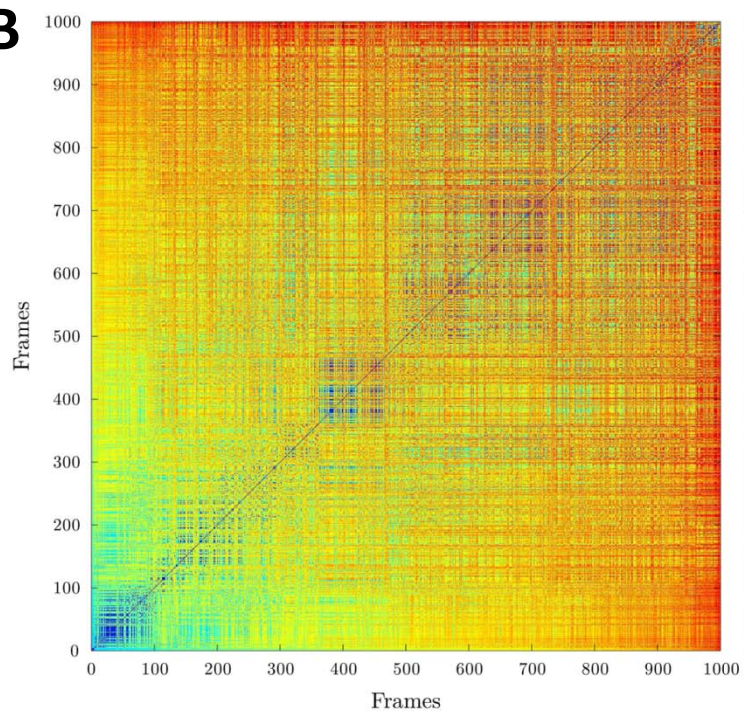

DRAMP18260

**C**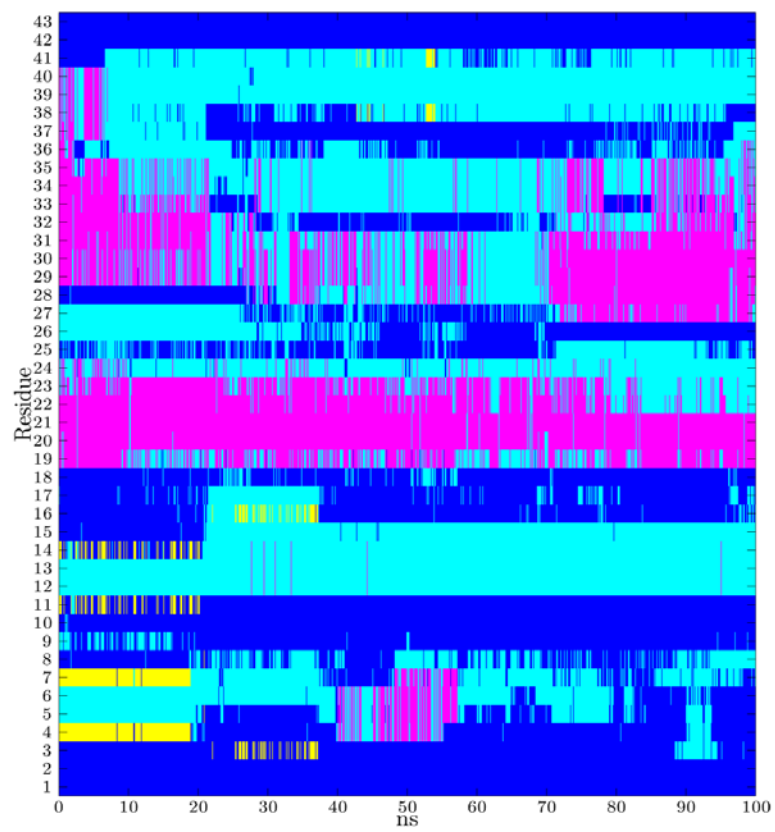

**A**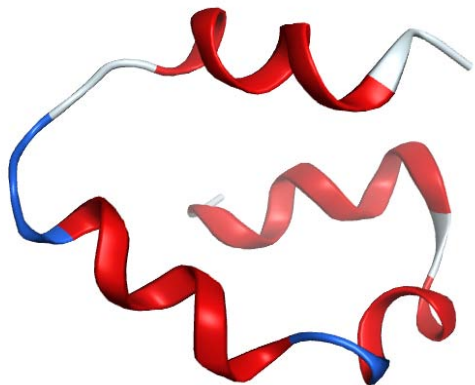**B**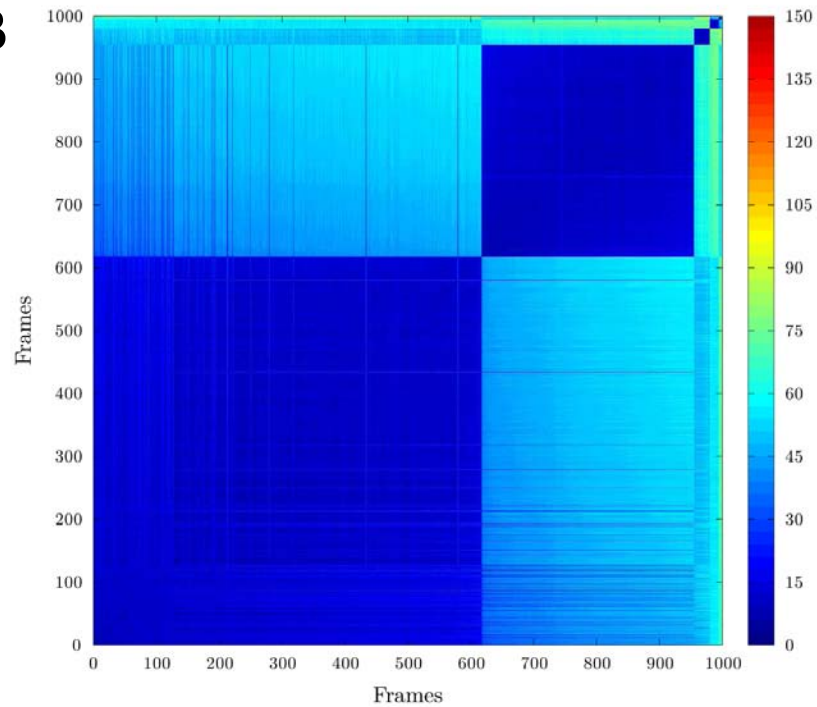

DRAMP18261

**C**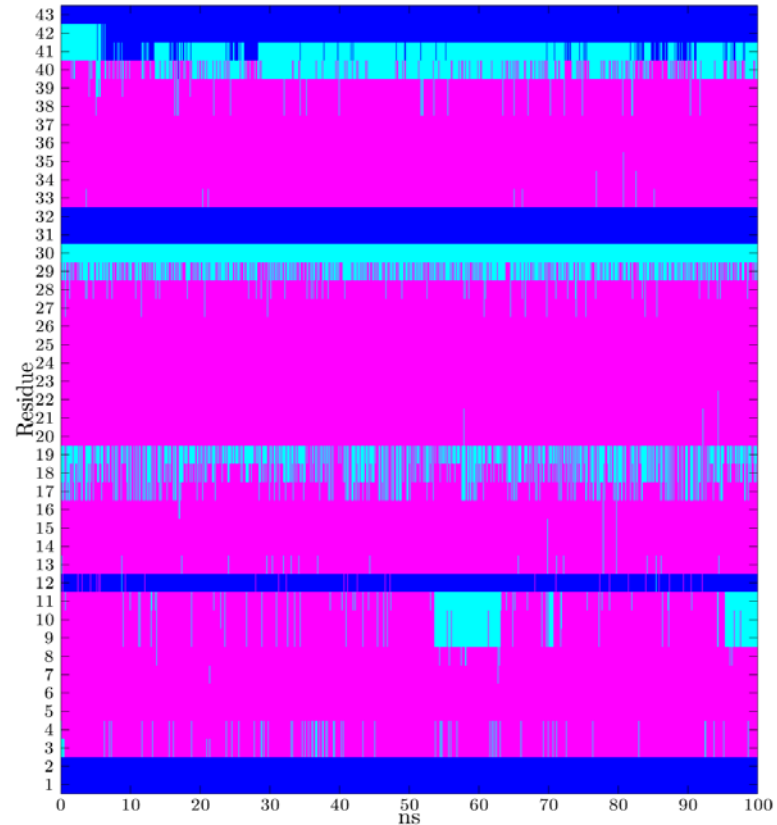

**A**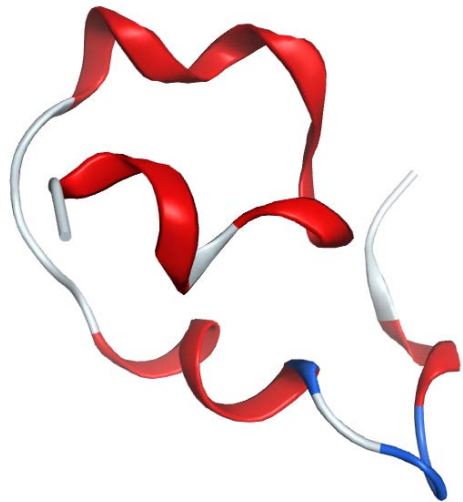**B**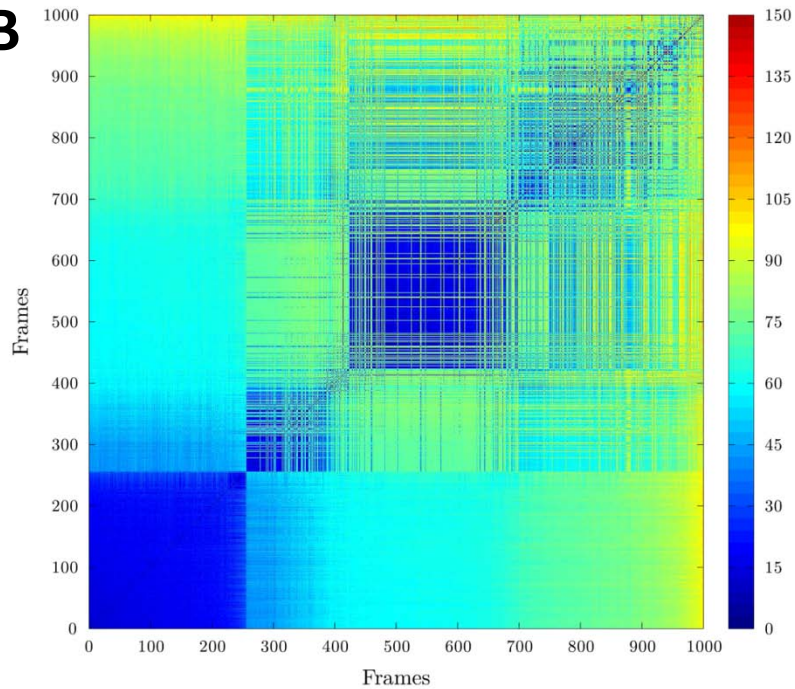

DRAMP00151

**C**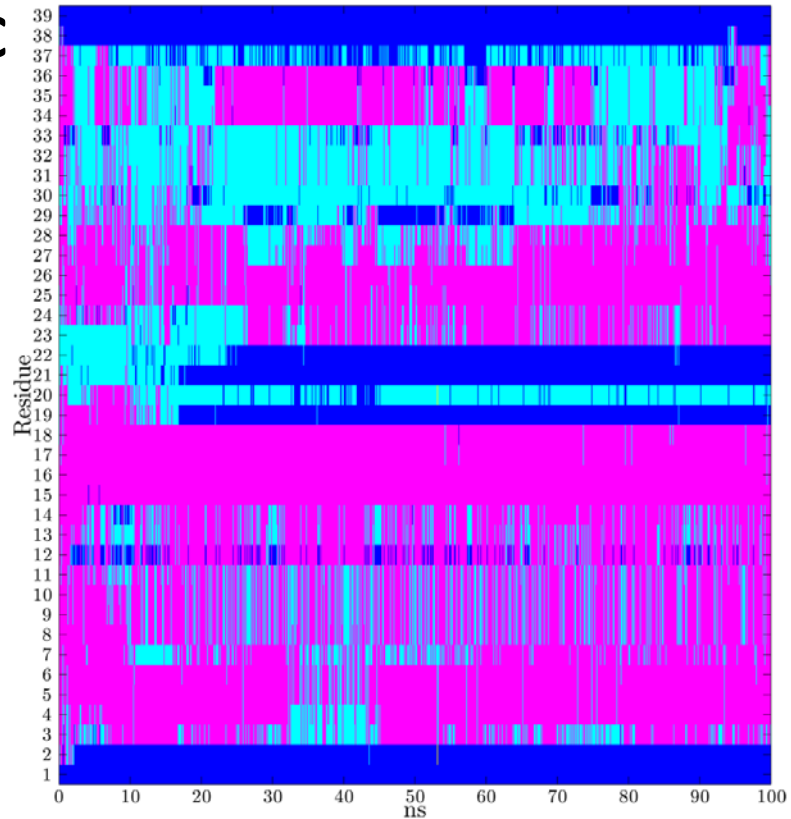

**A**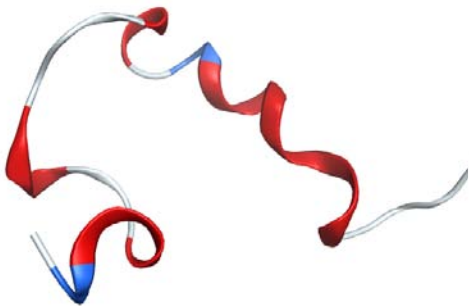**B**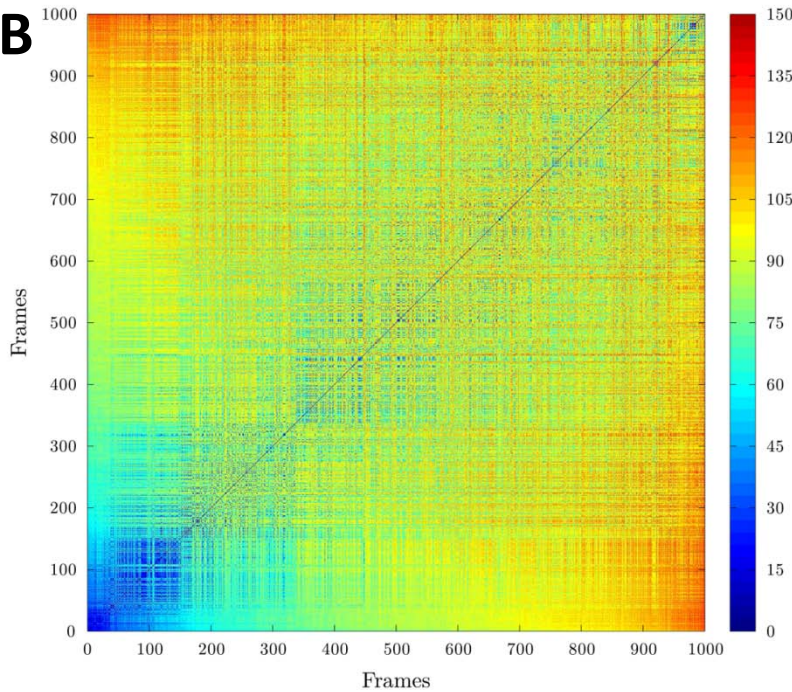

DRAMP00152

**C**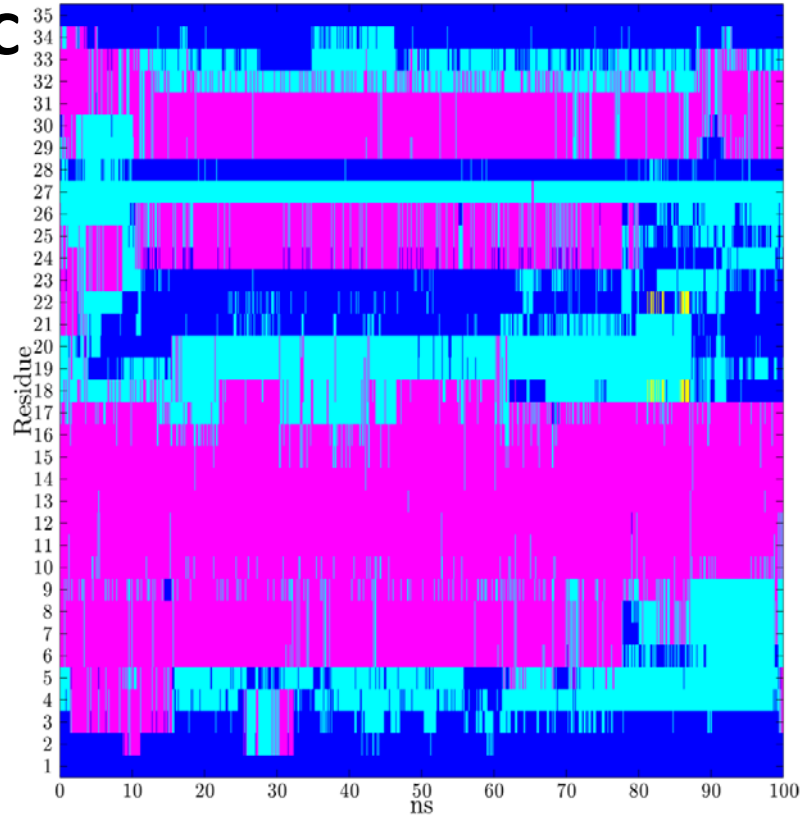



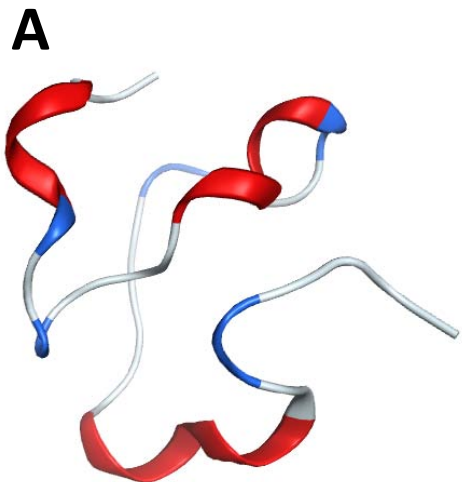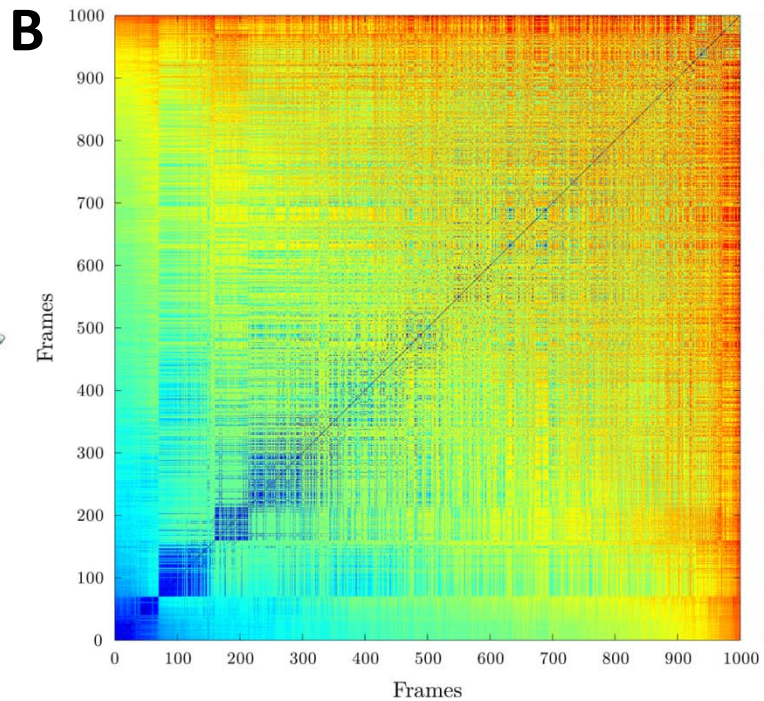

DRAMP00178

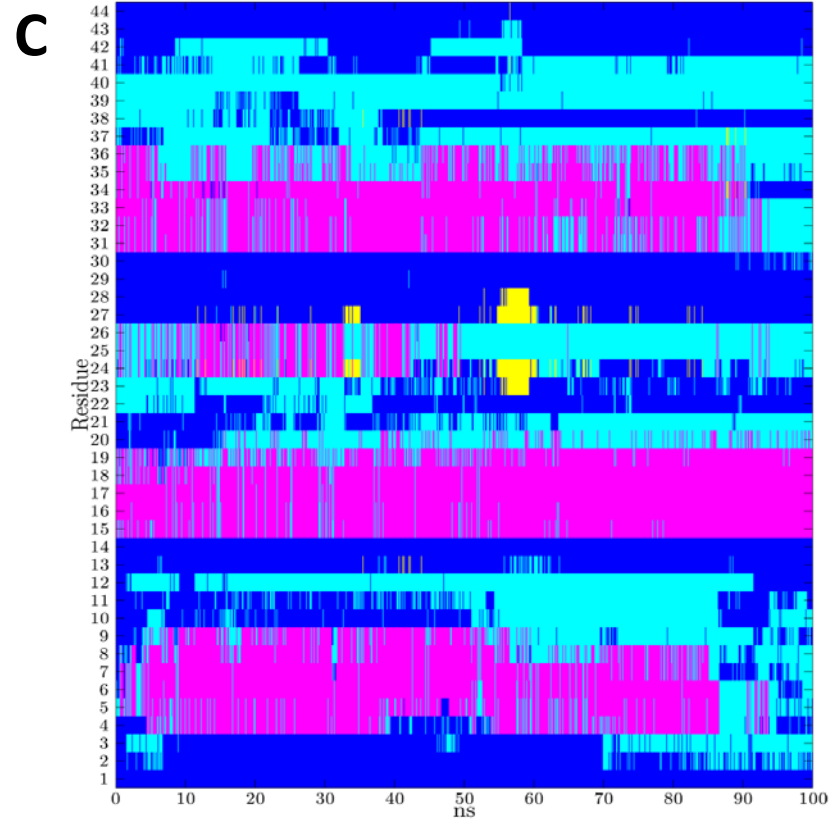



**A**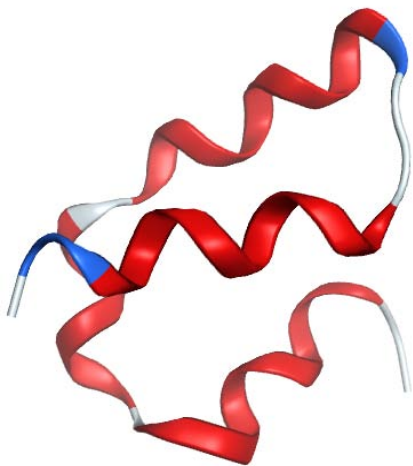**B**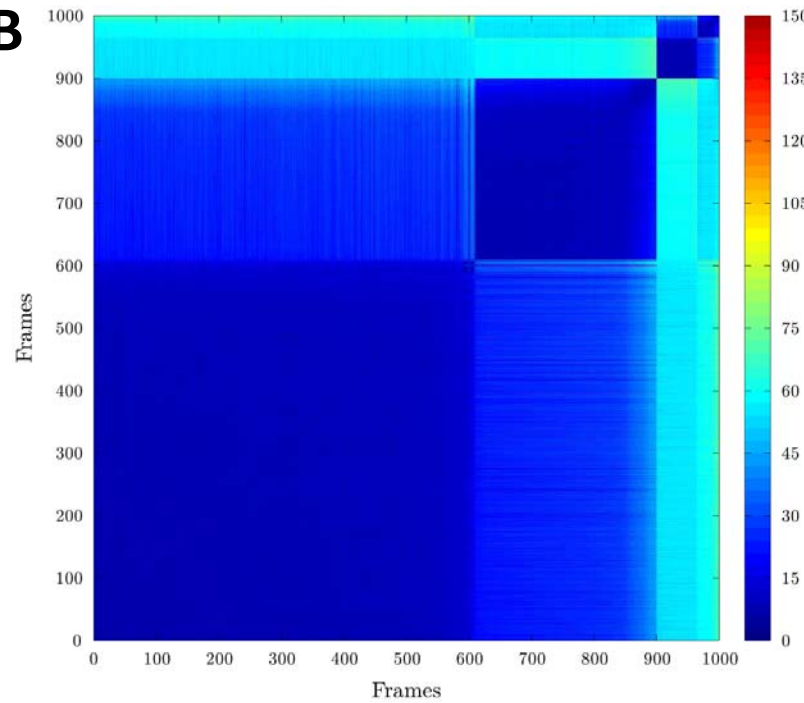

DRAMP18262

**C**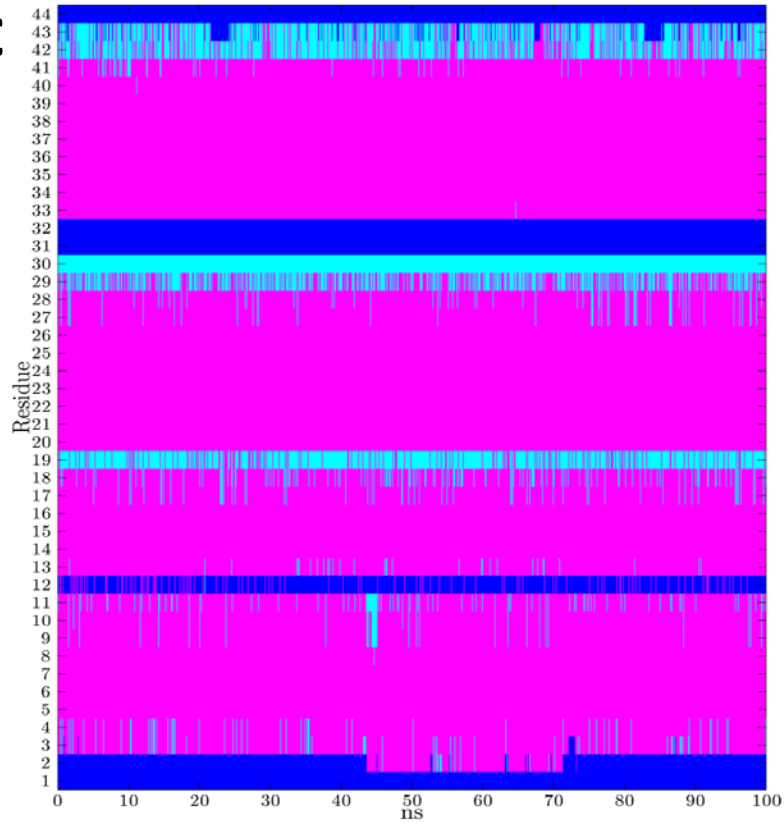

**A**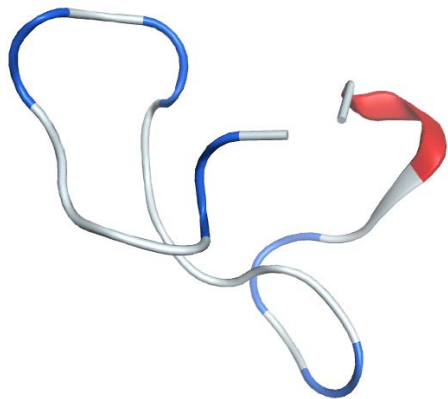**B**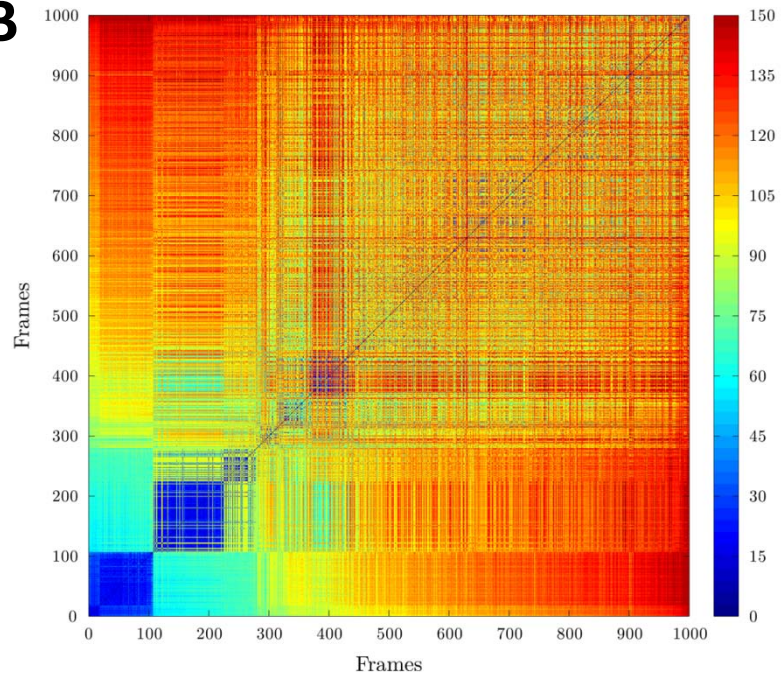**C**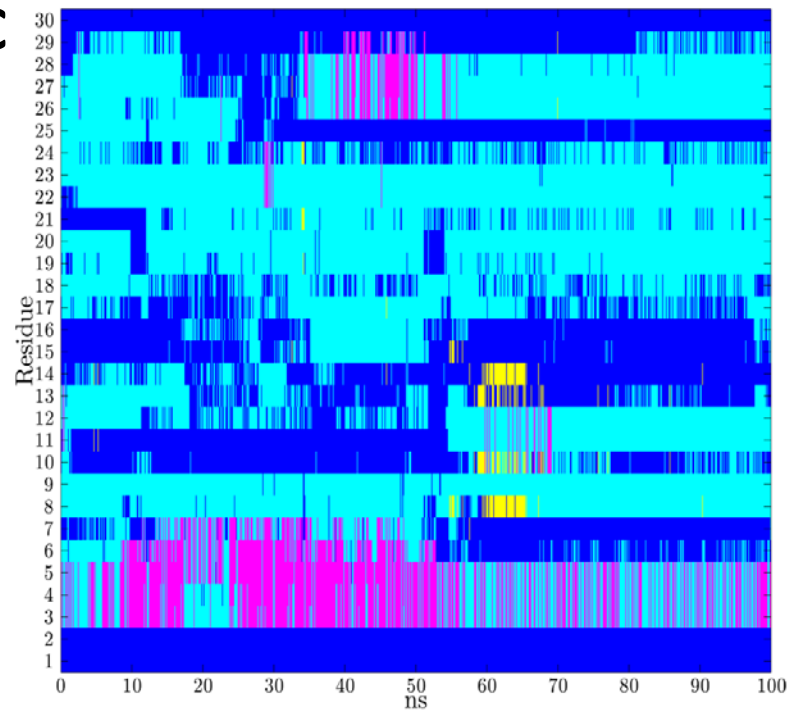

DRAMP18263

**A**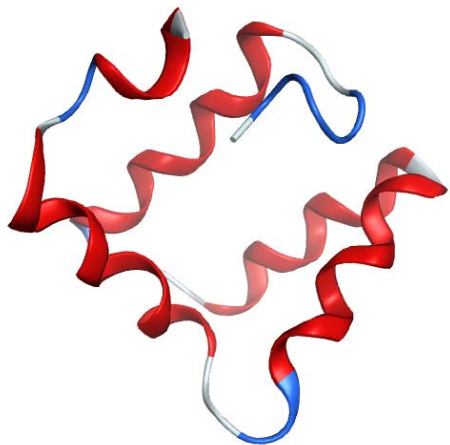**B**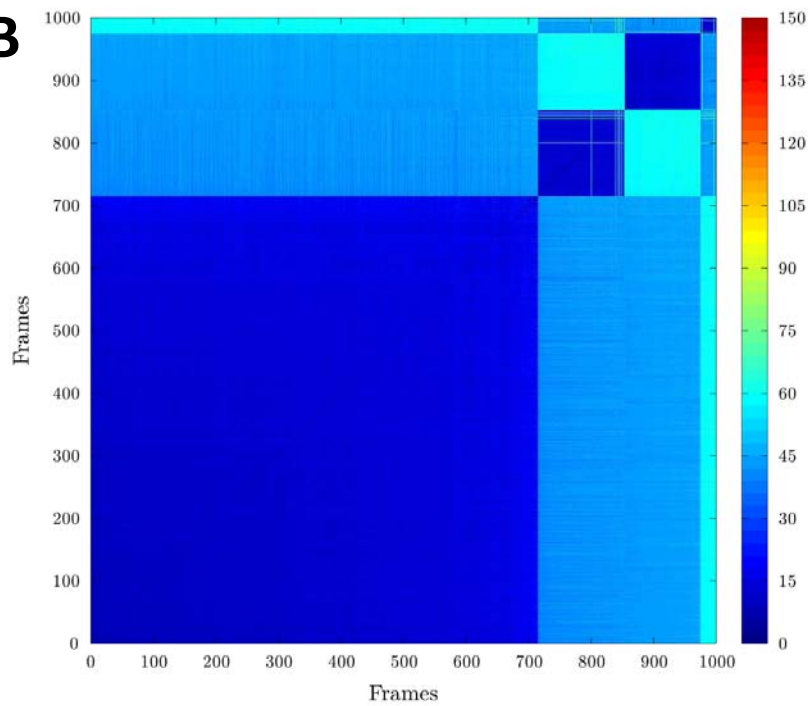

DRAMP18265

**C**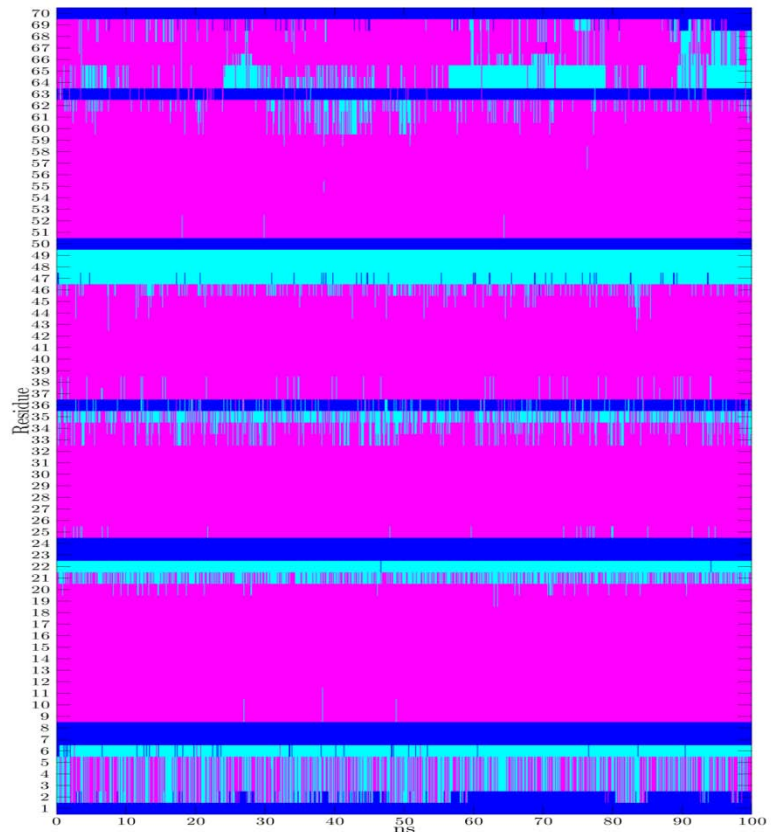

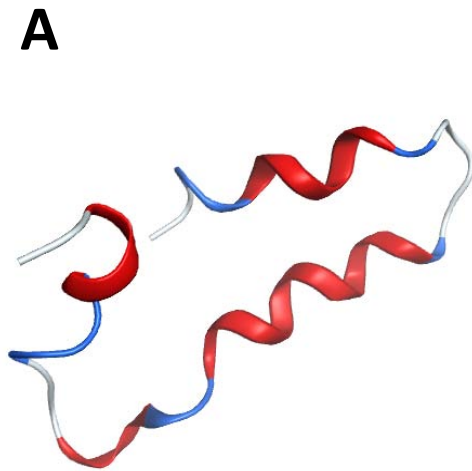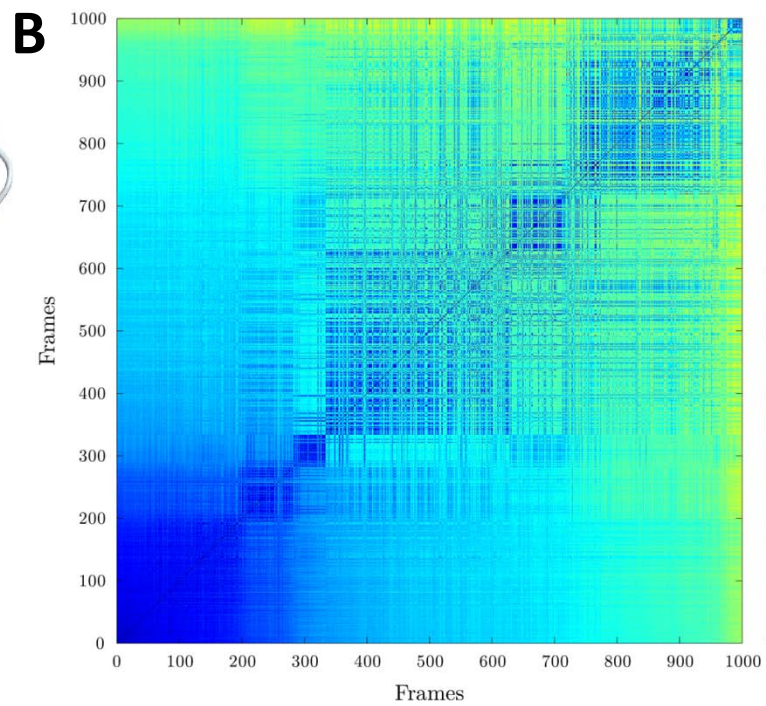

DRAMP00188

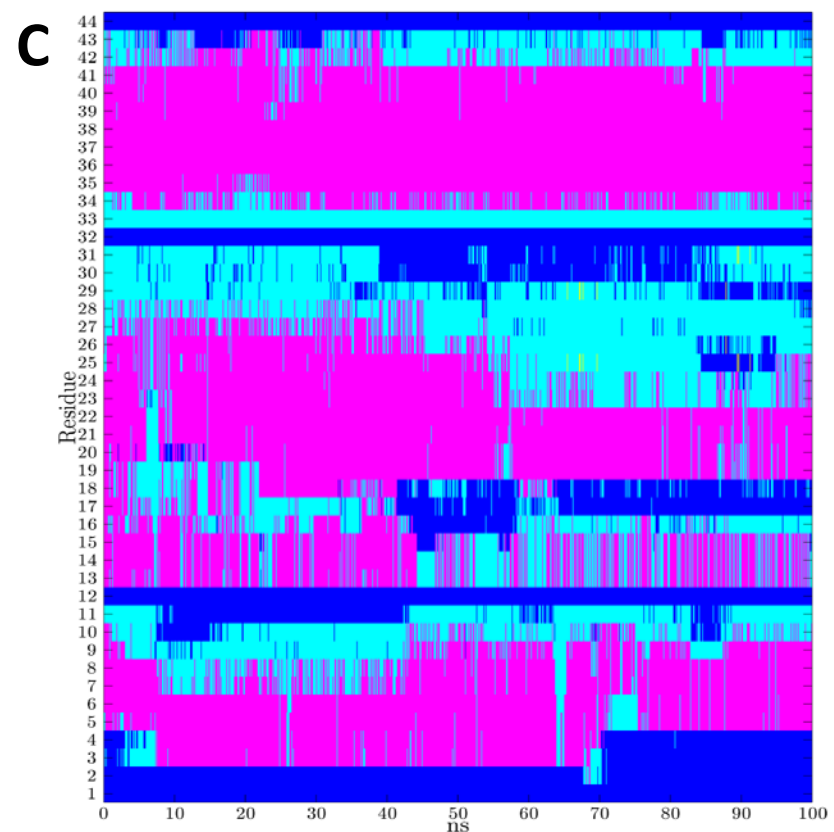



**A**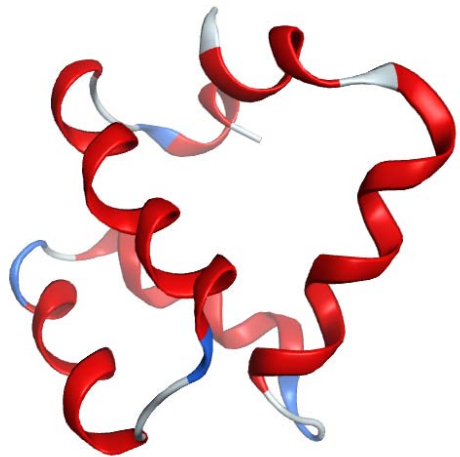**B**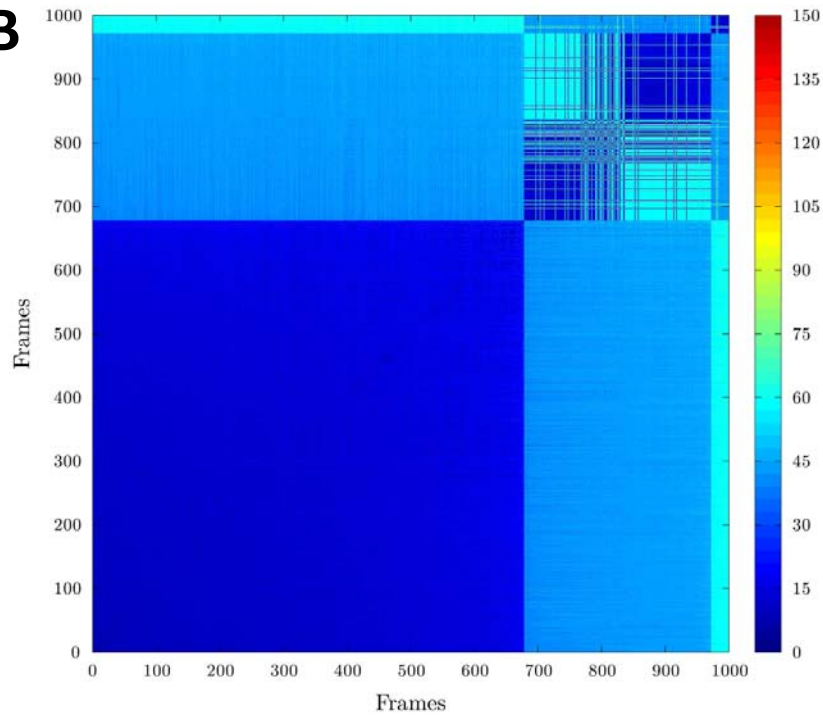

DRAMP00169

**C**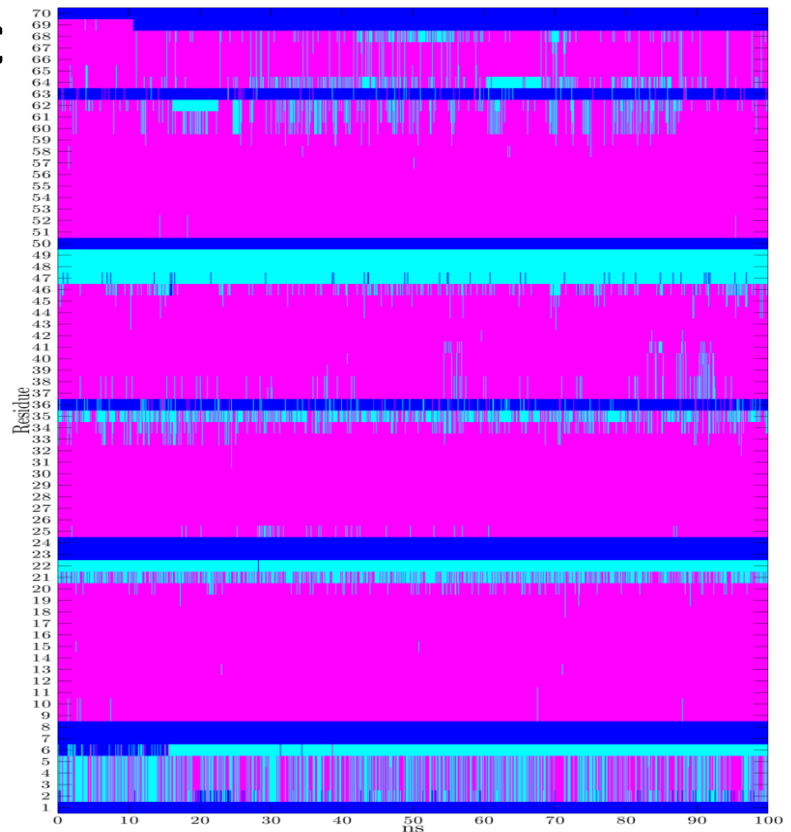

**A**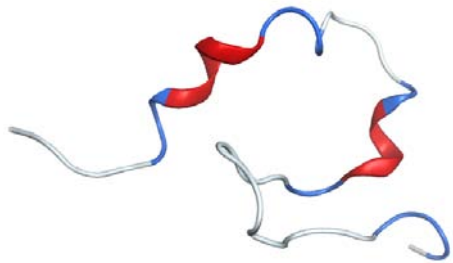**B**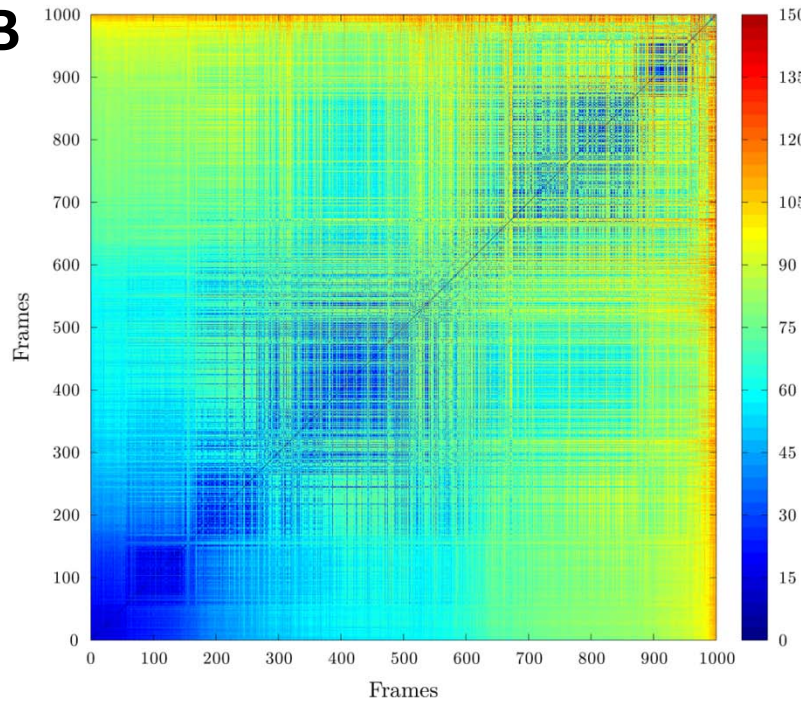

DRAMP00079

**C**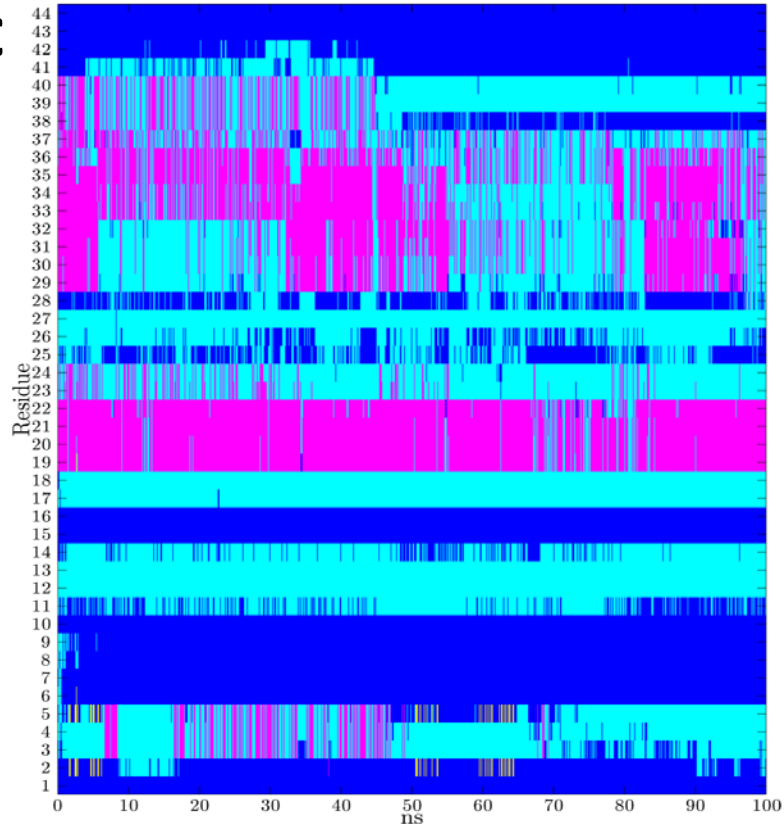

**A**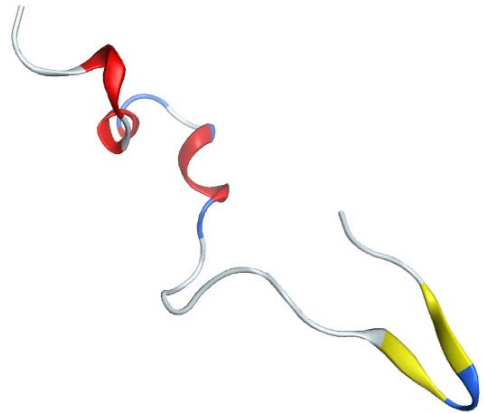**B**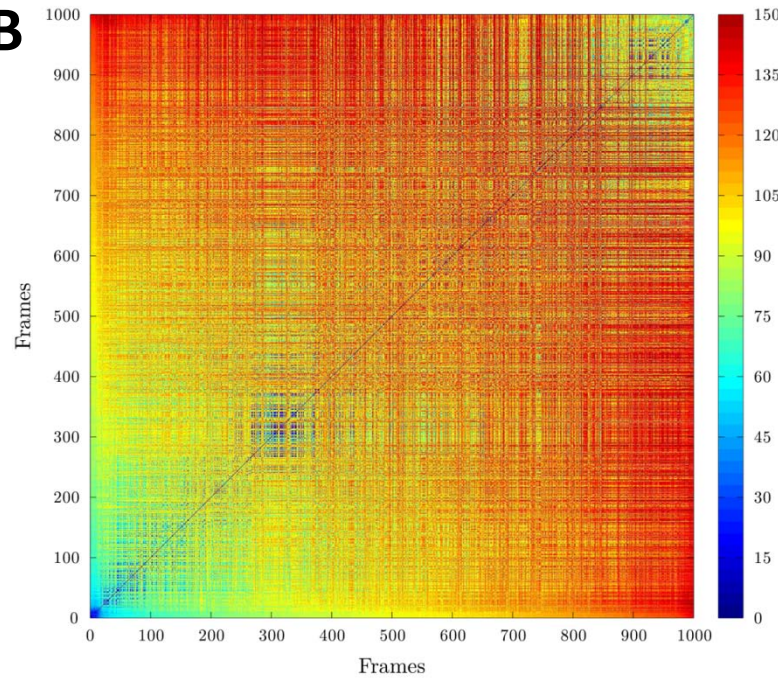

DRAMP00075

**C**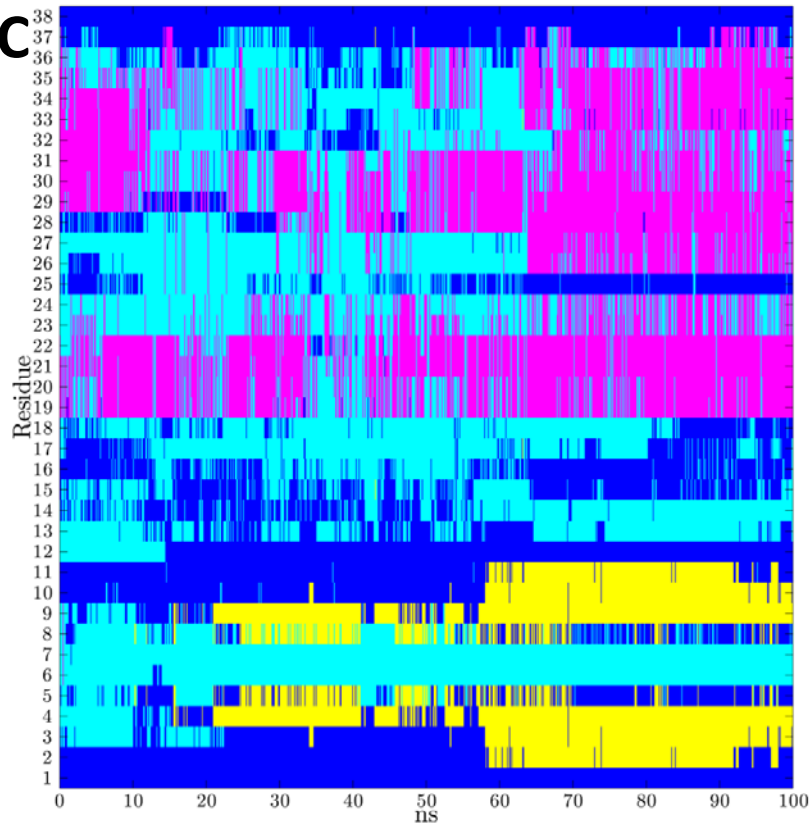

**A**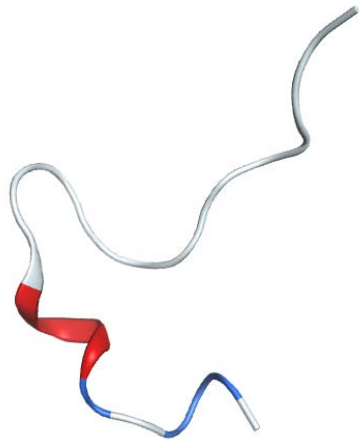**B**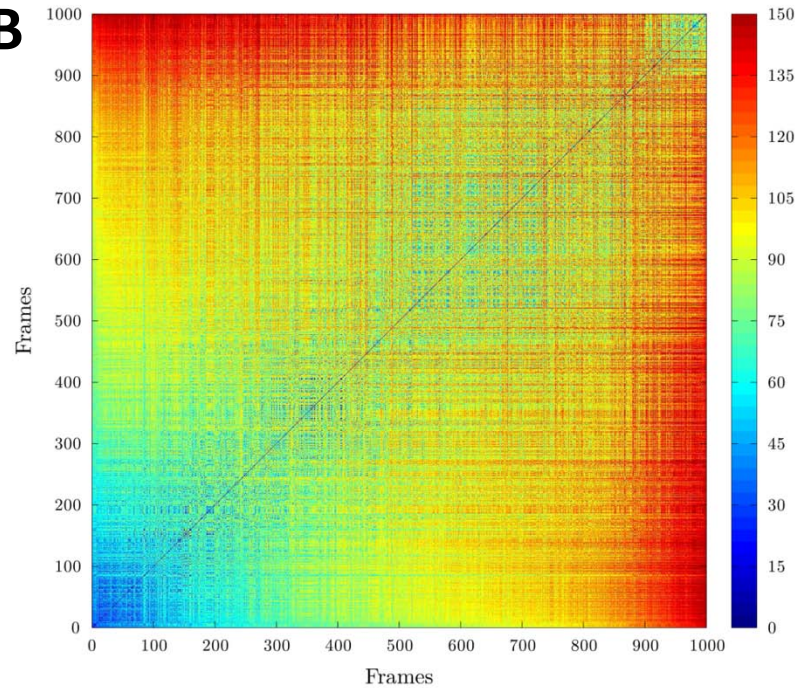

DRAMP18267

**C**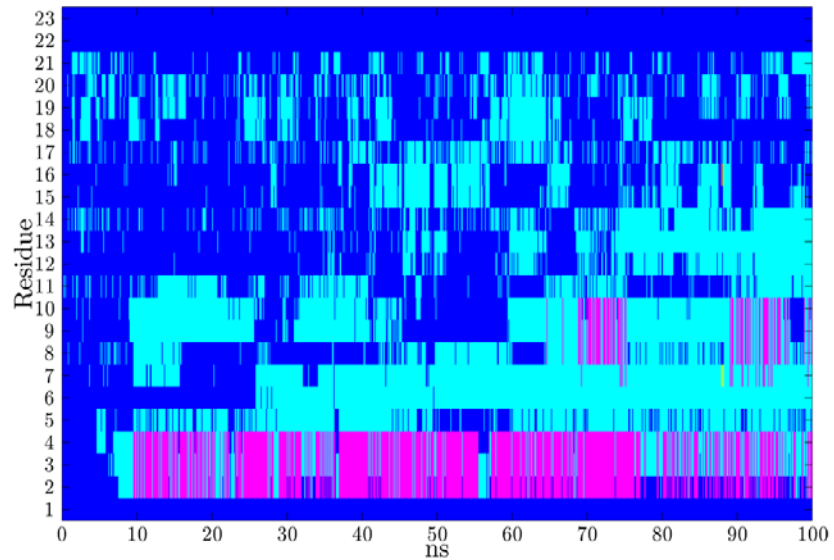



**A**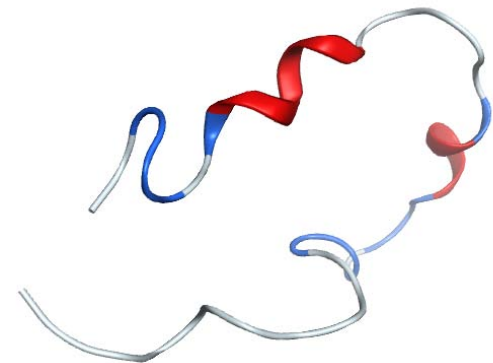**B**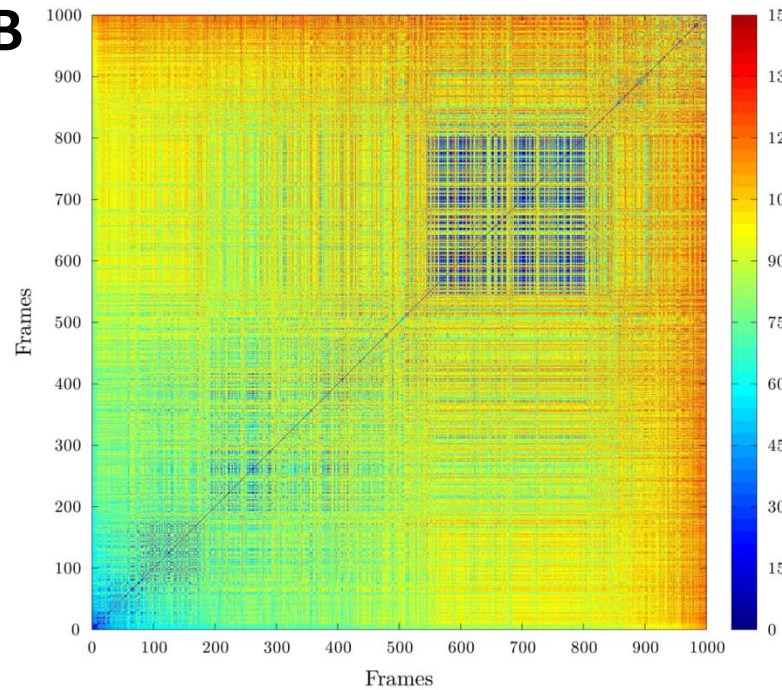**DRAMP00121****C**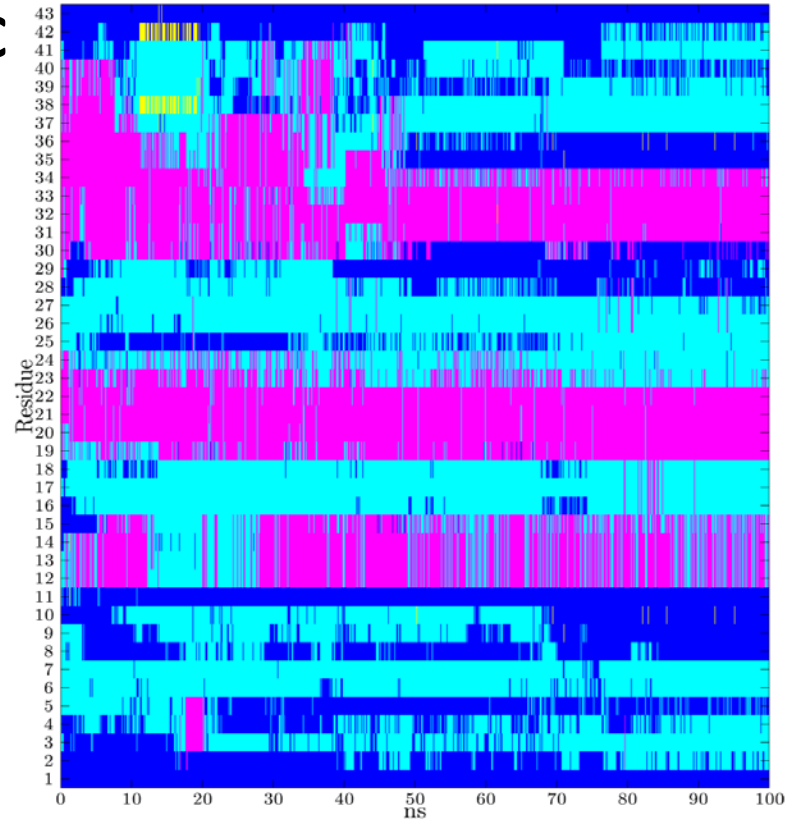

**A**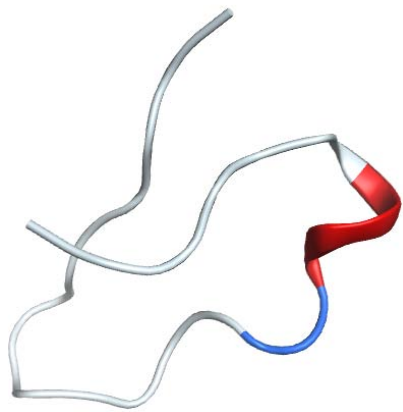**B**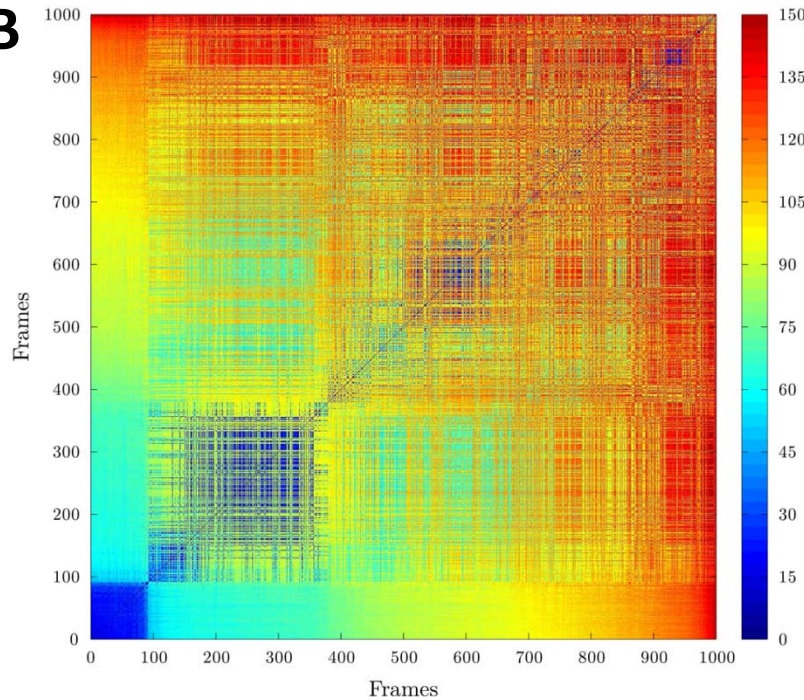**C**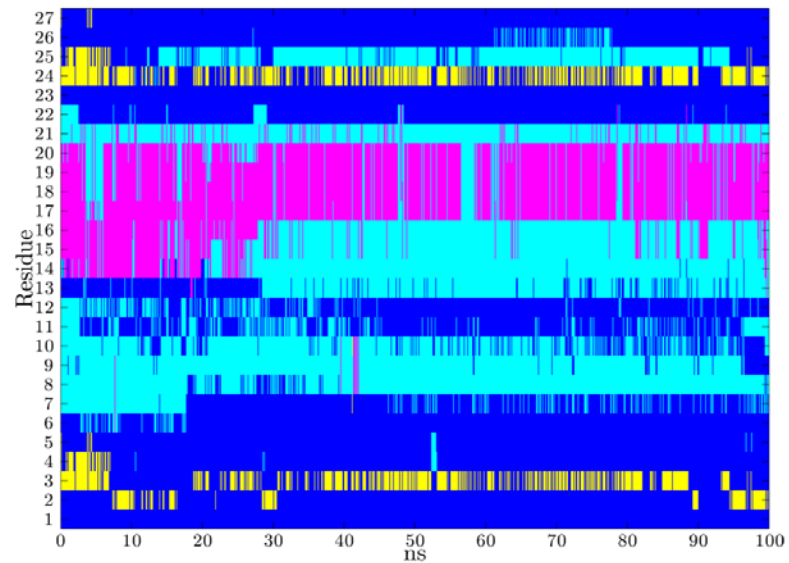

DRAMP00239

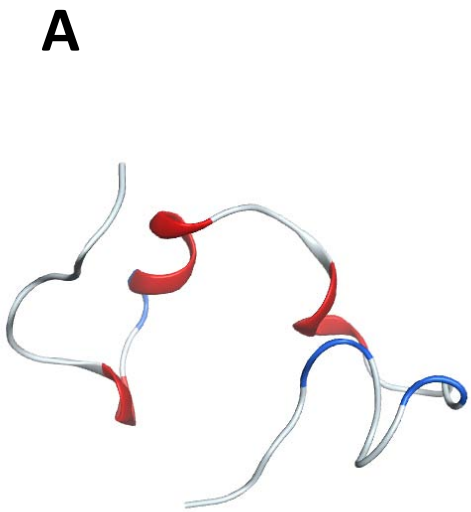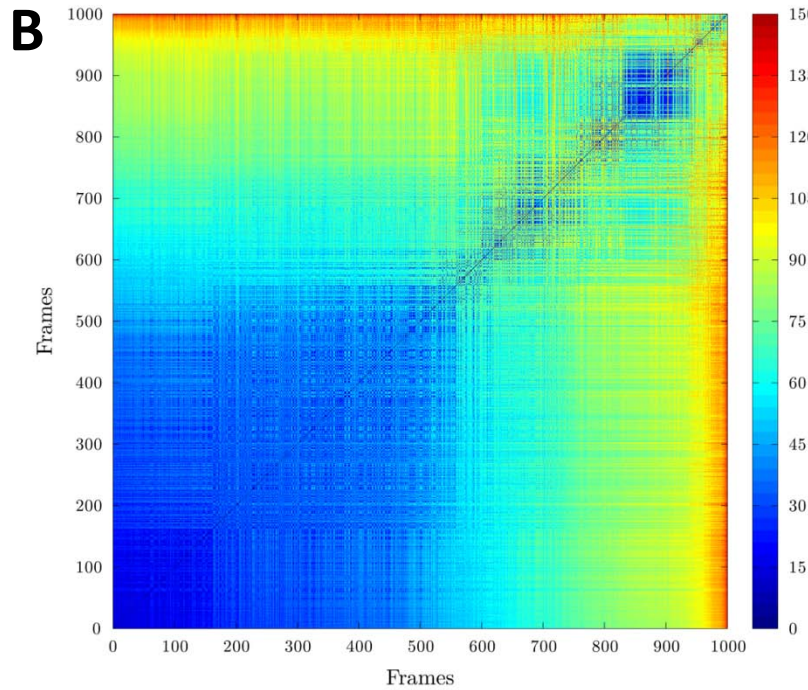

DRAMP18268

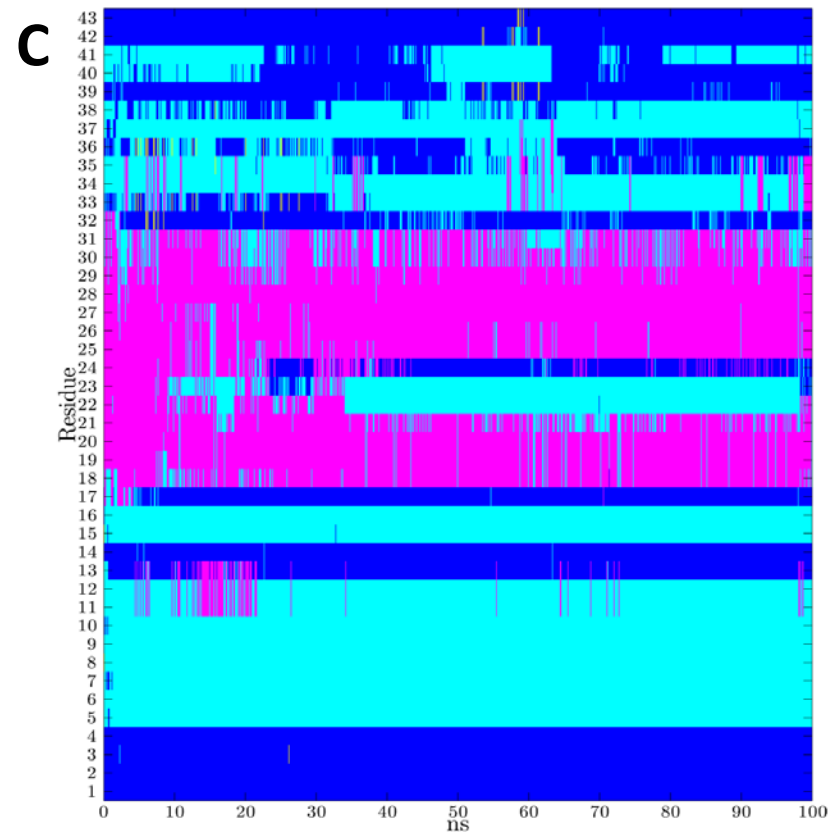

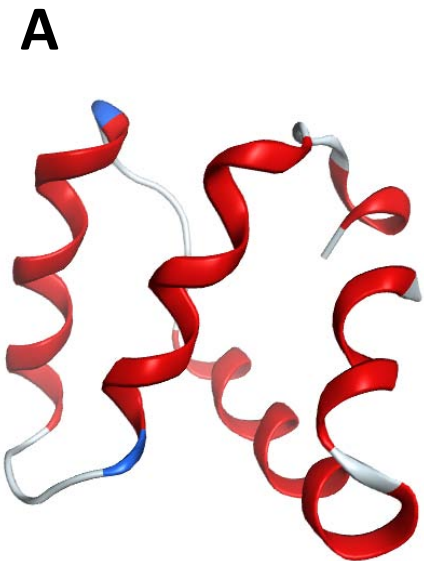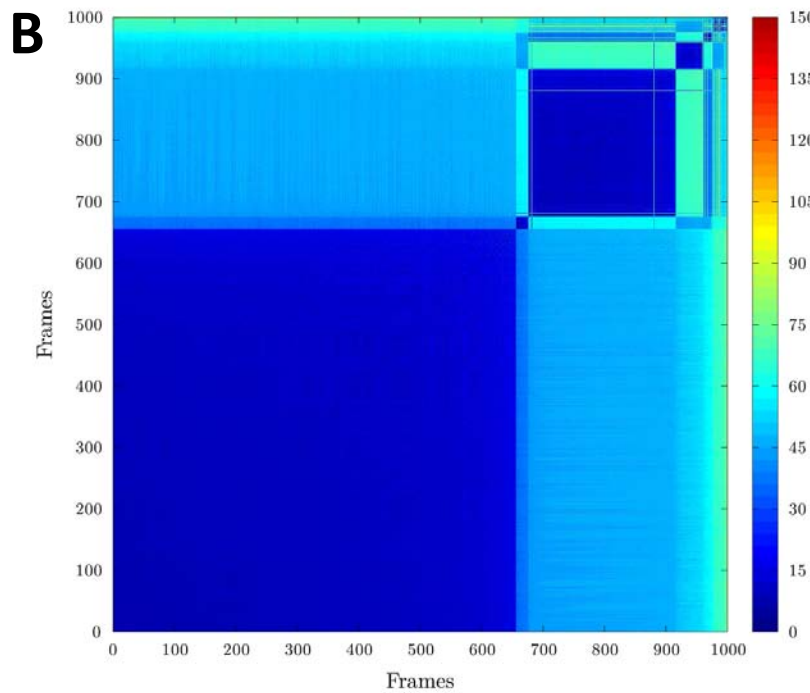

DRAMP18271

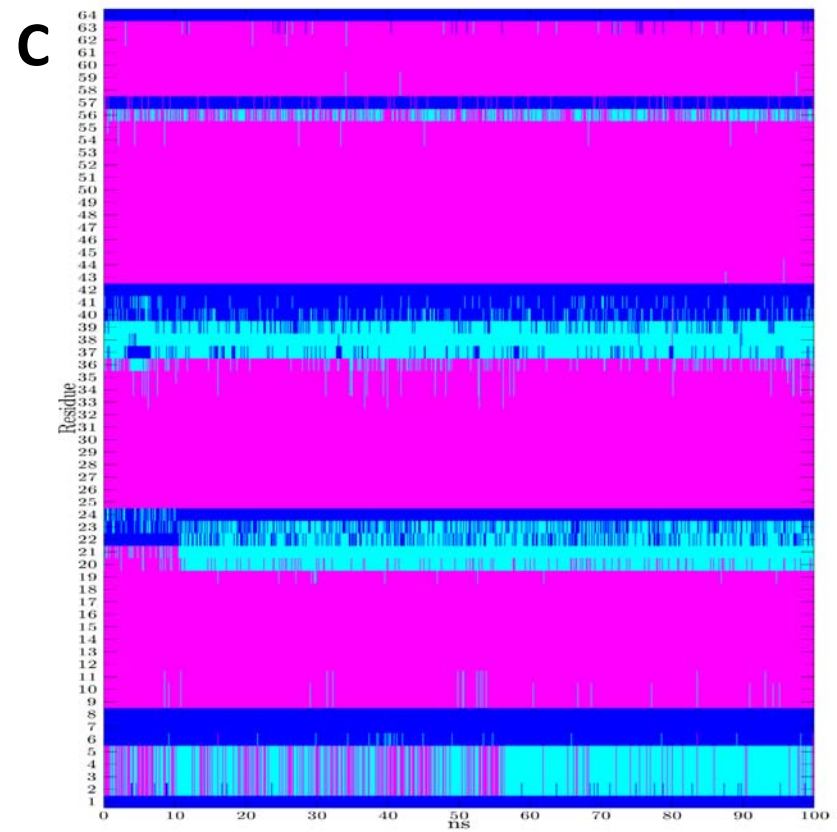



**A**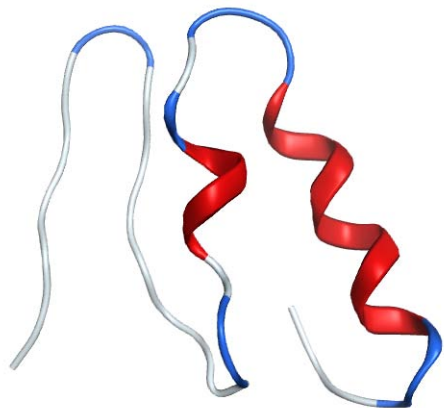**B**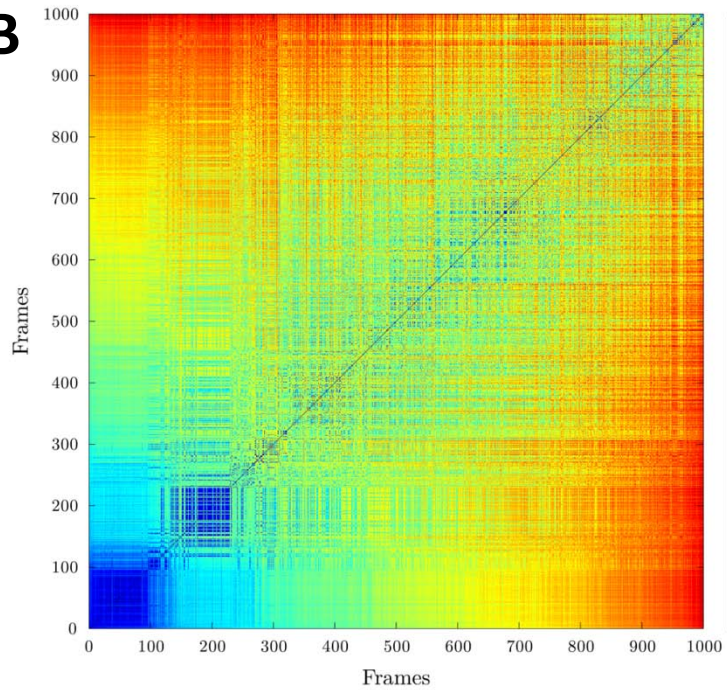

DRAMP00074

**C**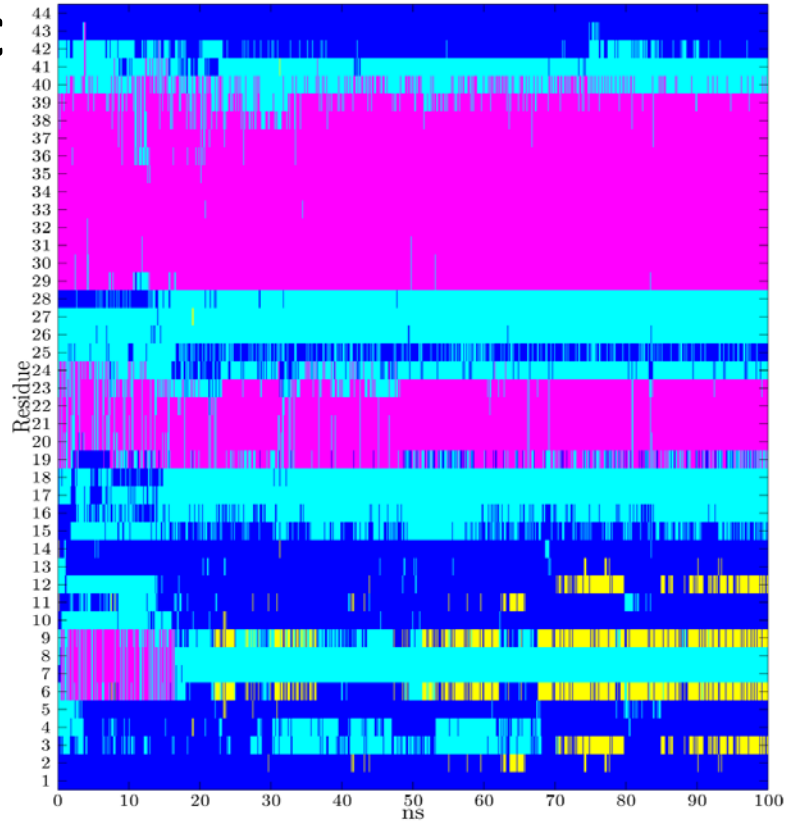

**A**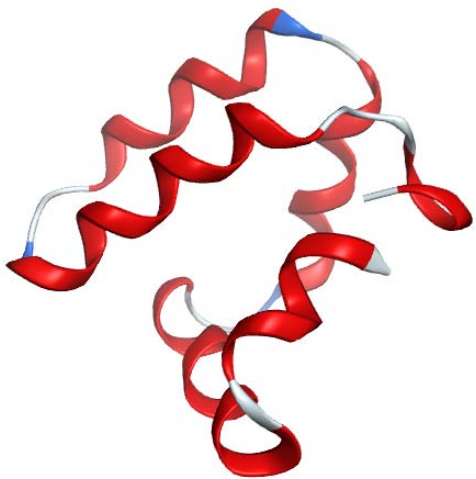**B**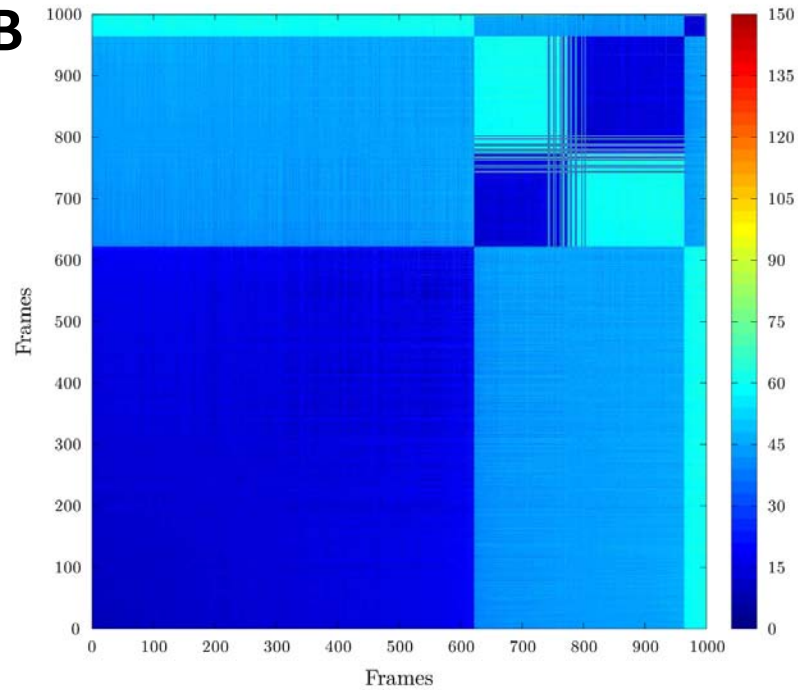

DRAMP18272

**C**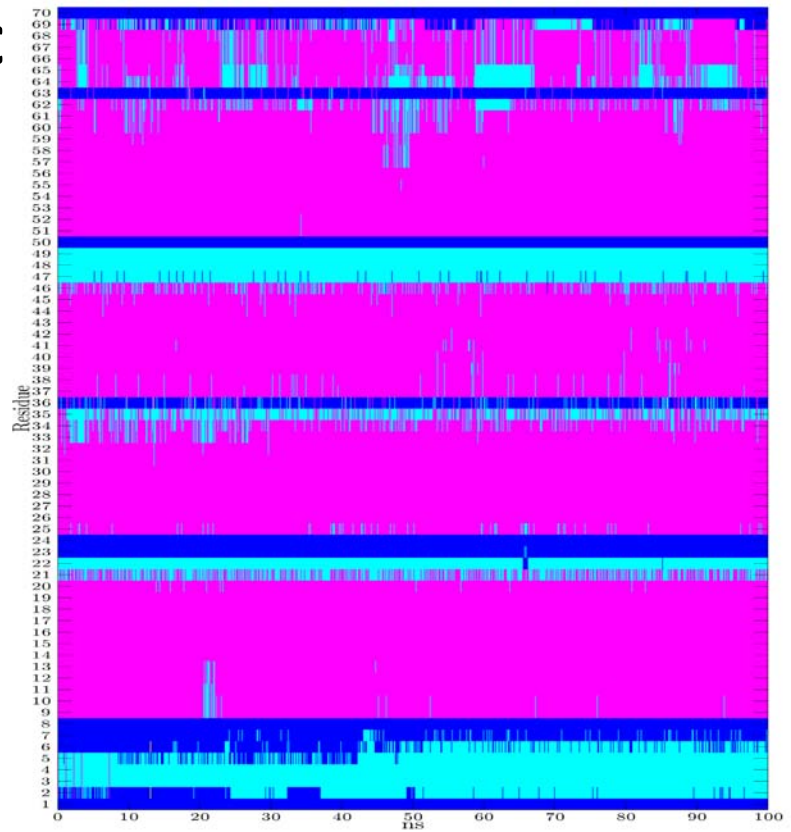

**A**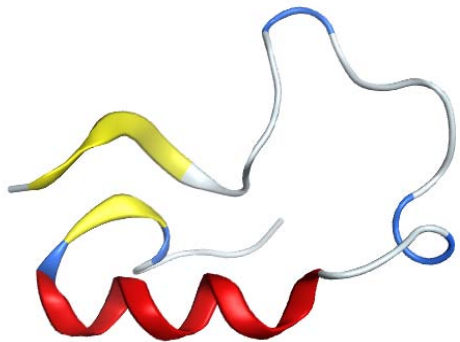**B**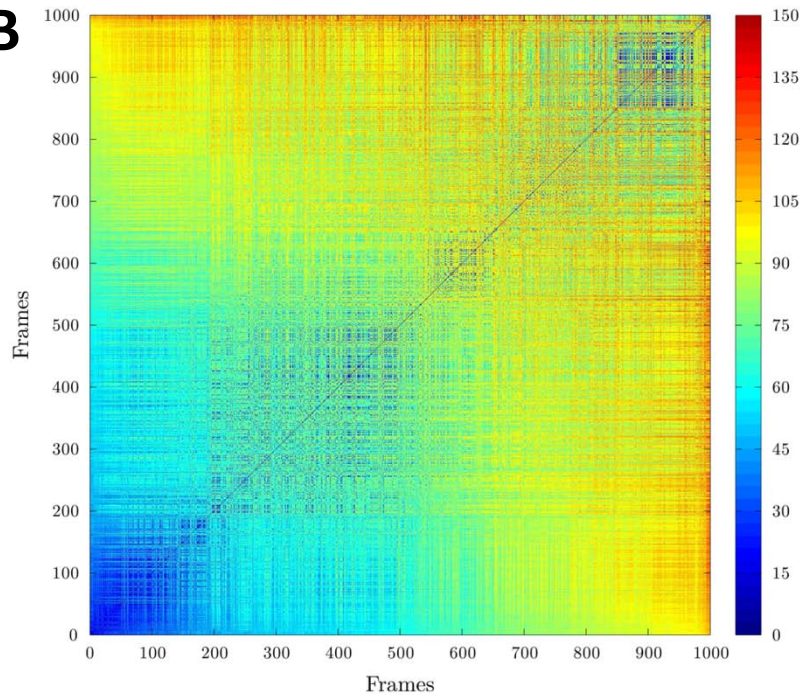

DRAMP00077

**C**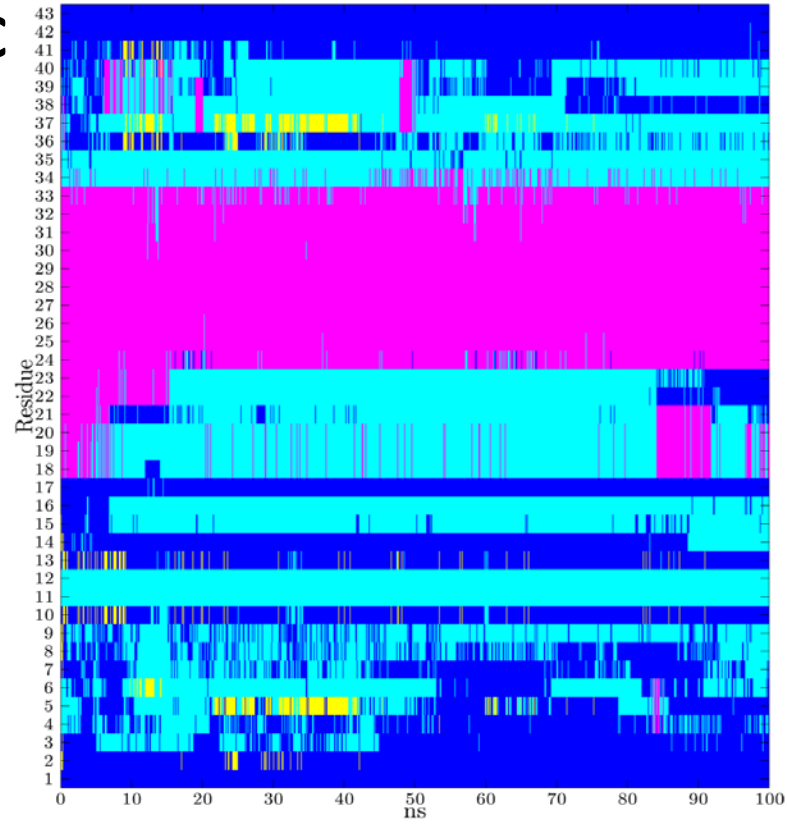

**A**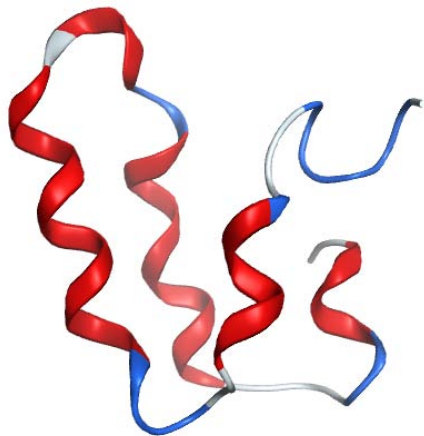**B**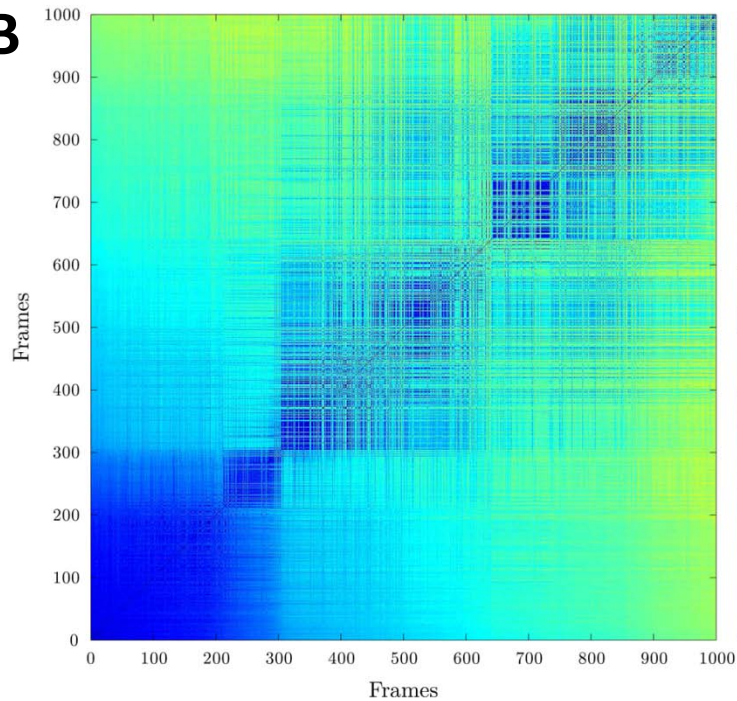

DRAMP00207

**C**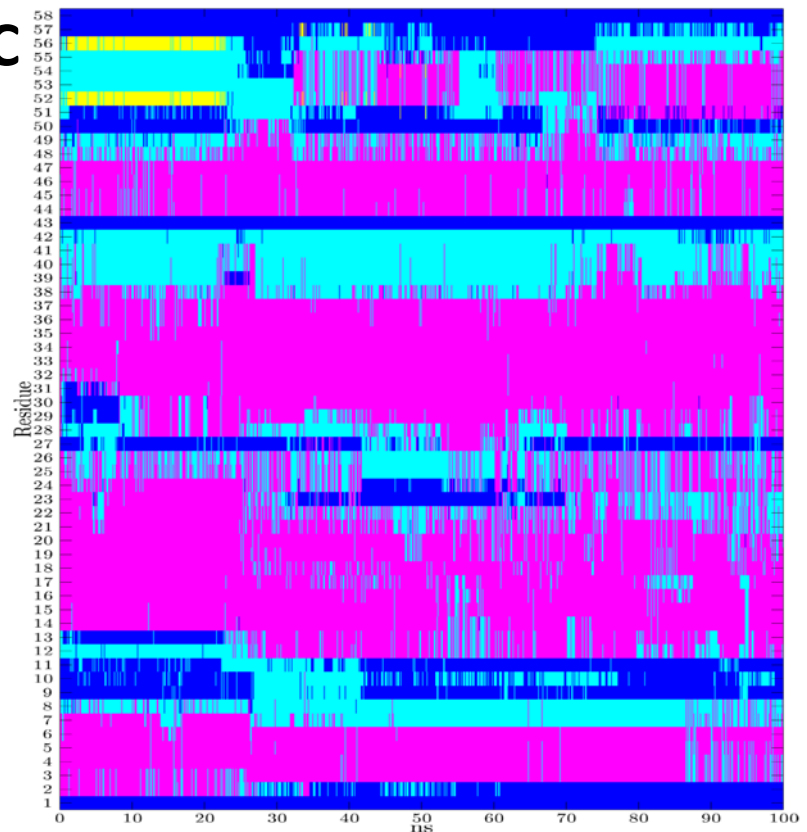



**A**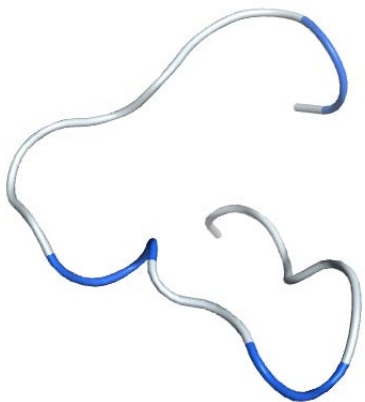**B**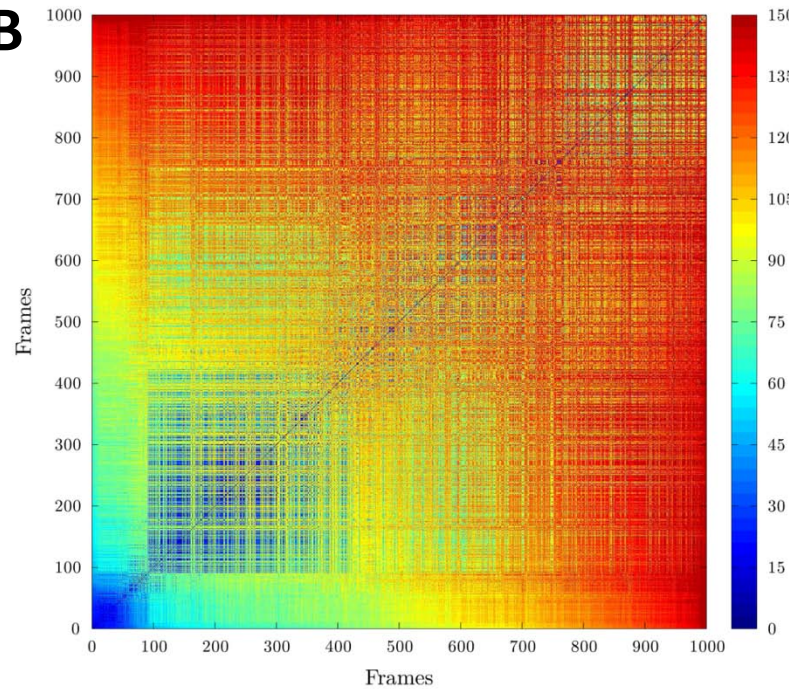**C**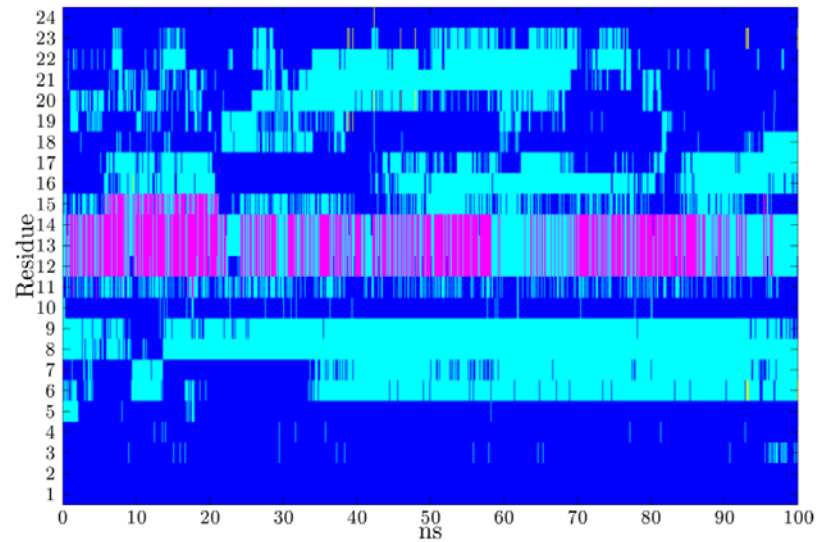

DRAMP00186

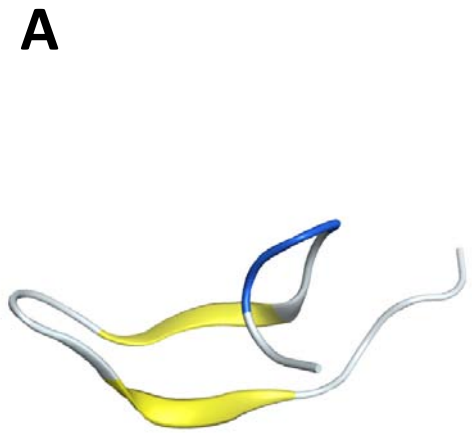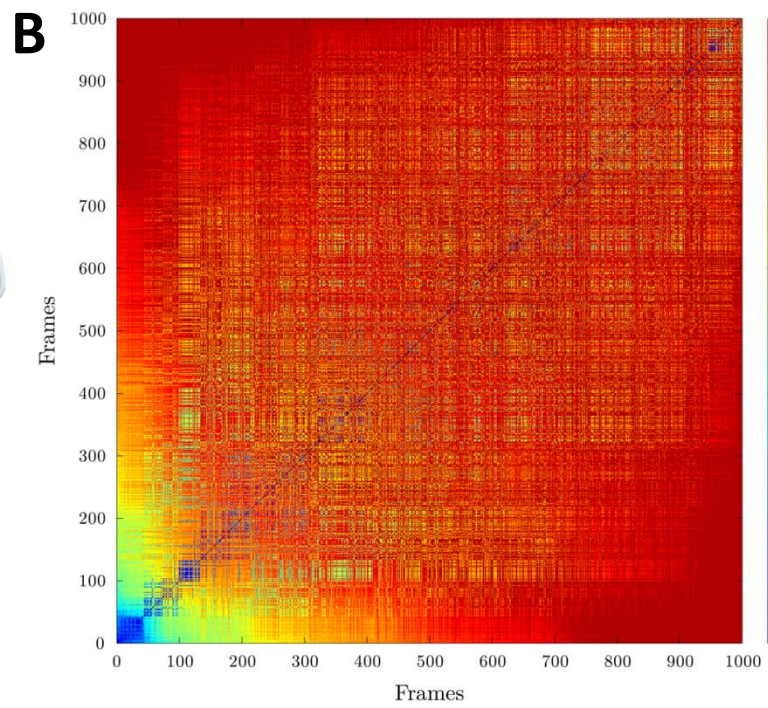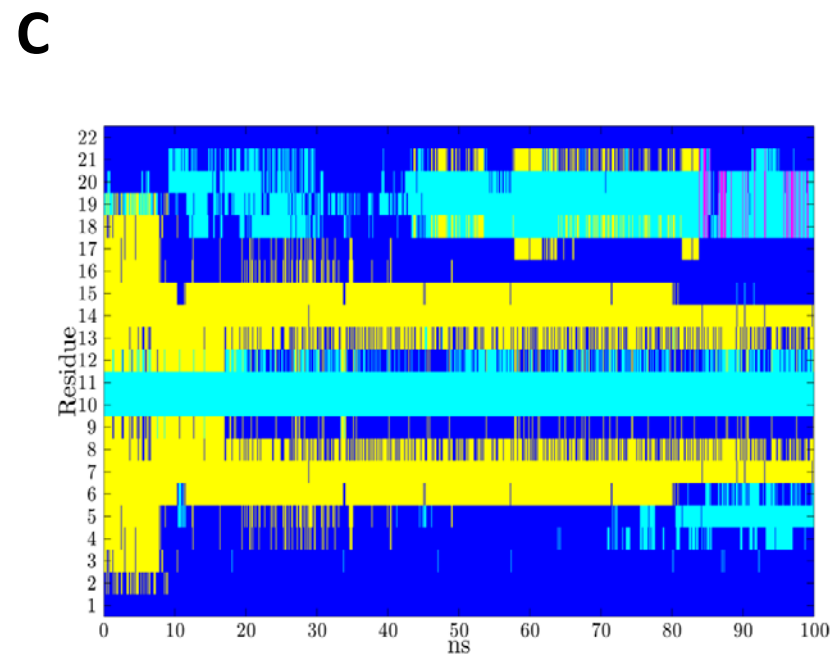

DRAMP00187

**A**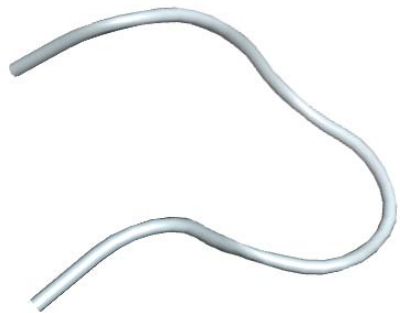**B**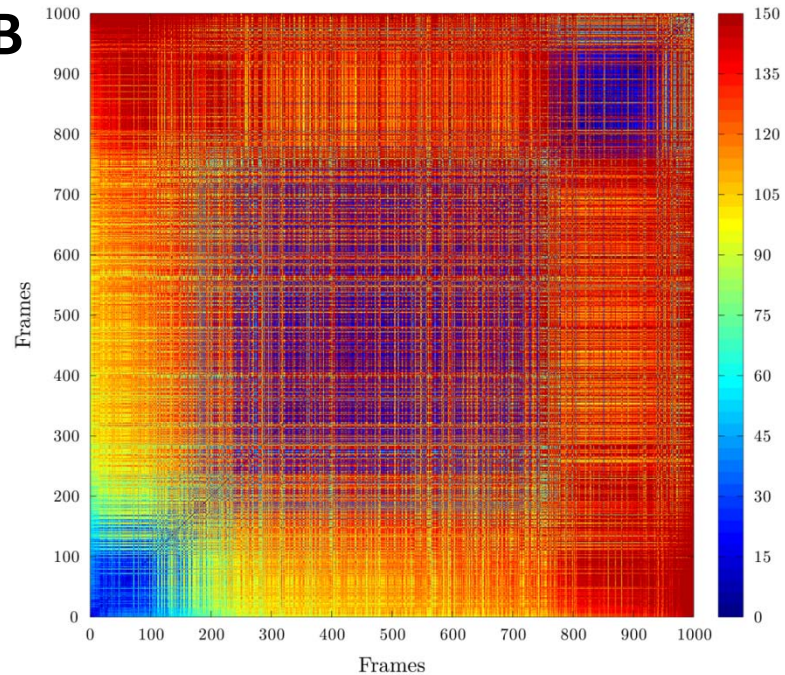**C**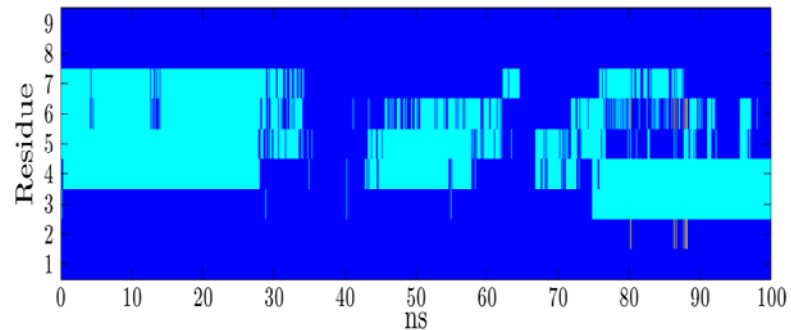

DRAMP00226

**A**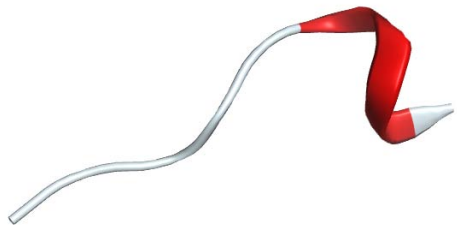**B**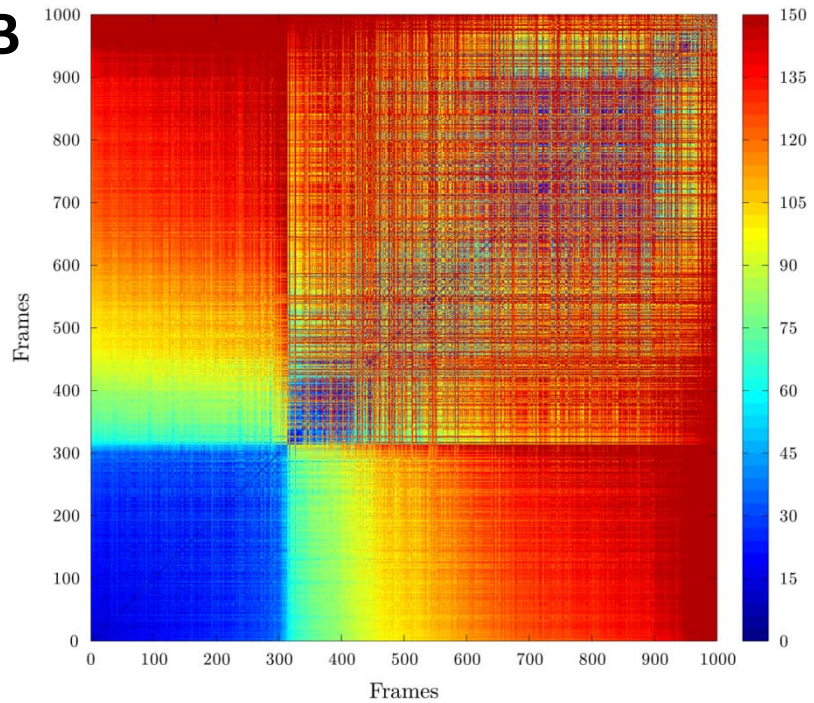**DRAMP00227****C**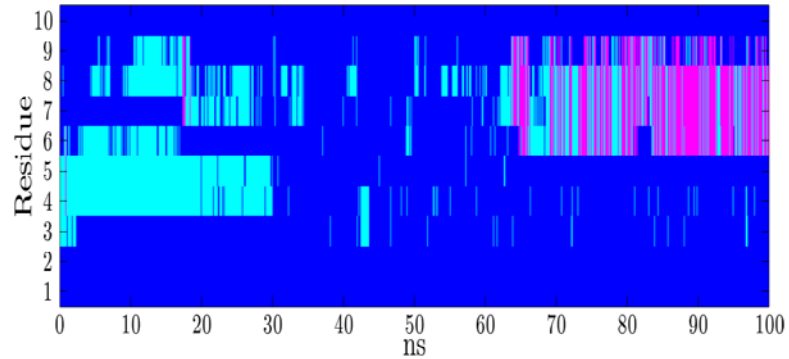



**A**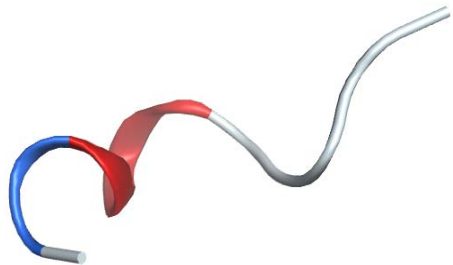**B**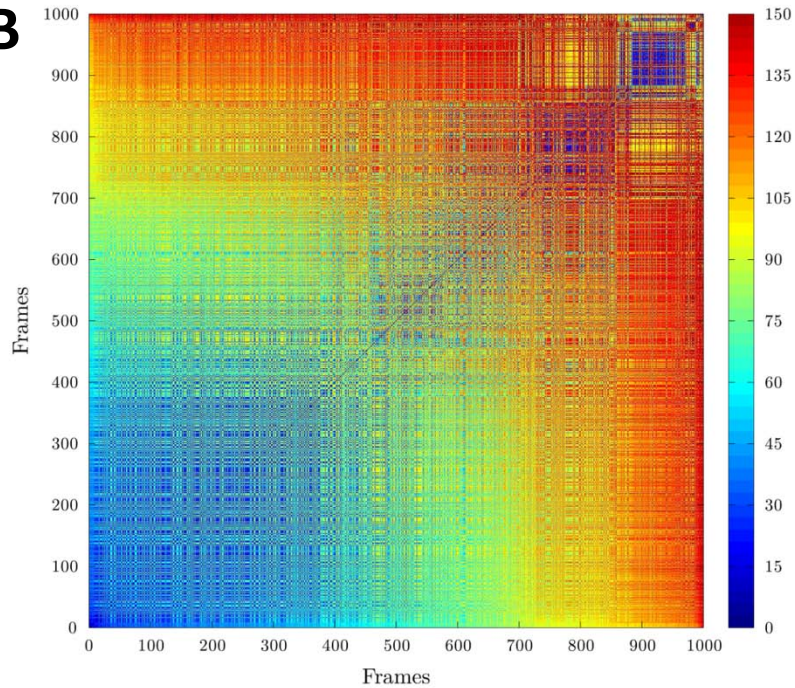**C**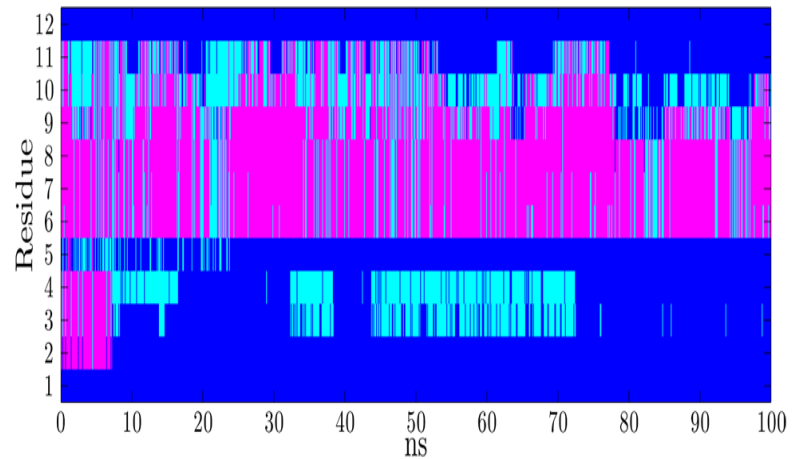

DRAMP00228

**A**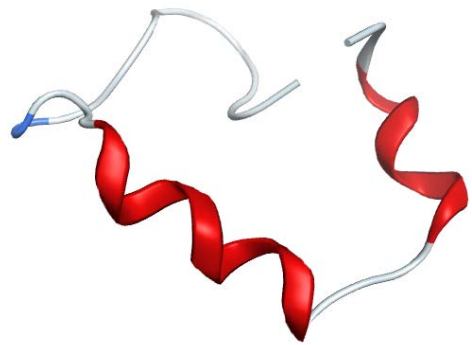**B**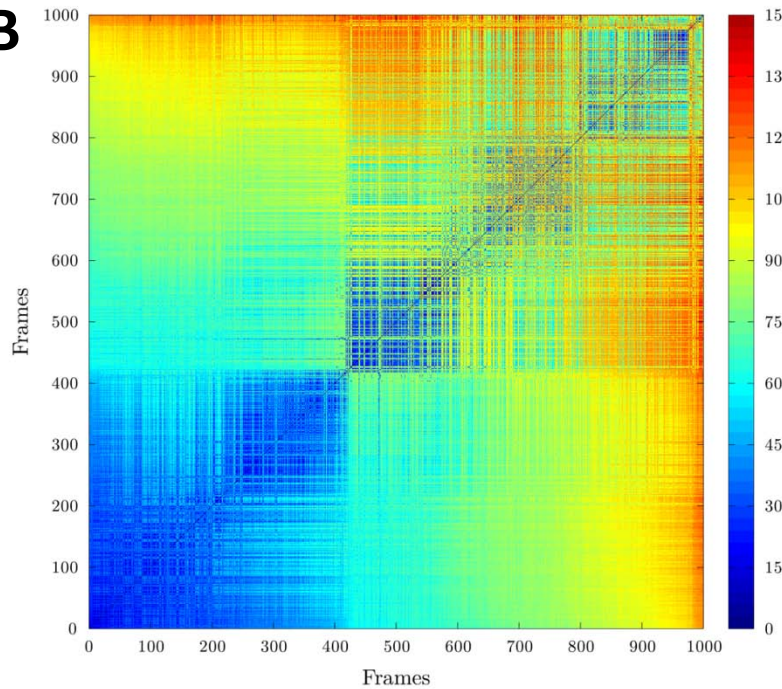

DRAMP00110

**C**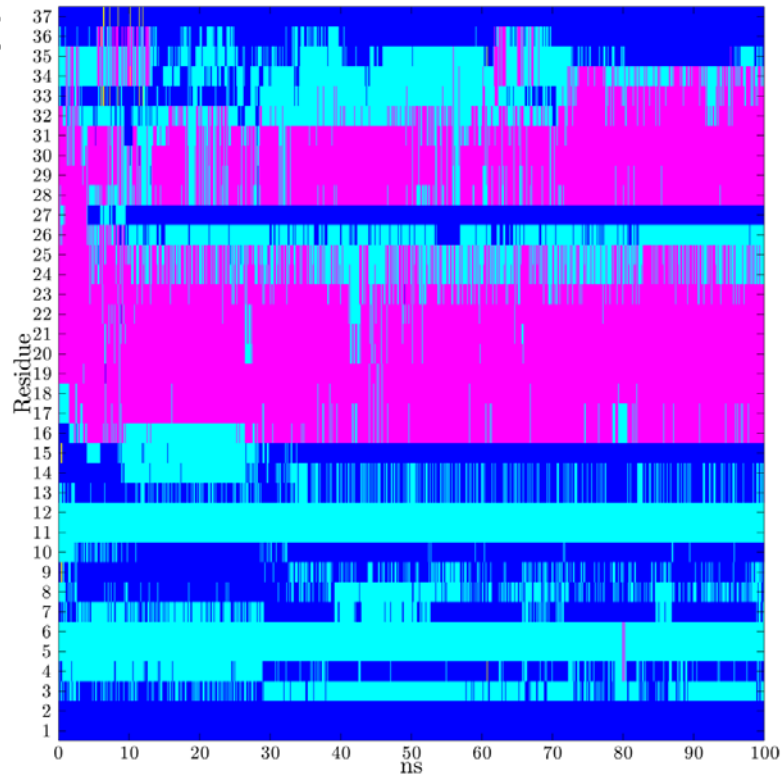

**A**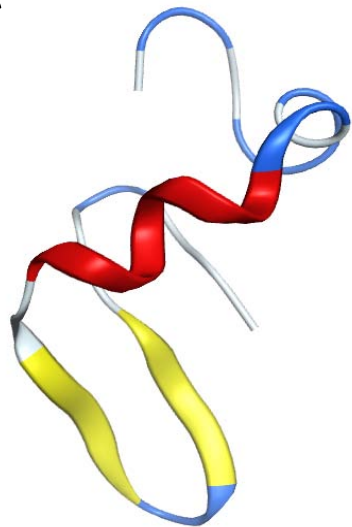**B**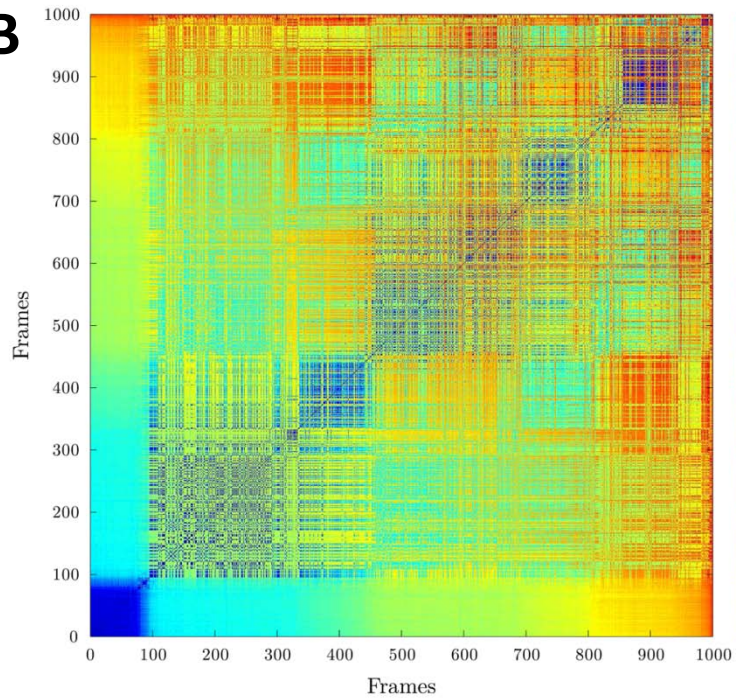

DRAMP00109

**C**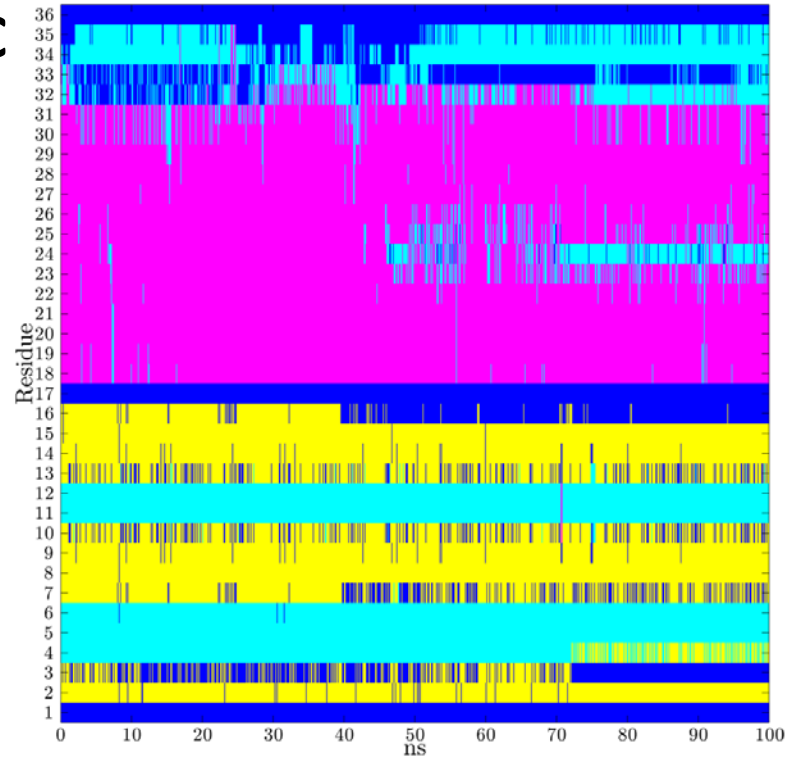

**A**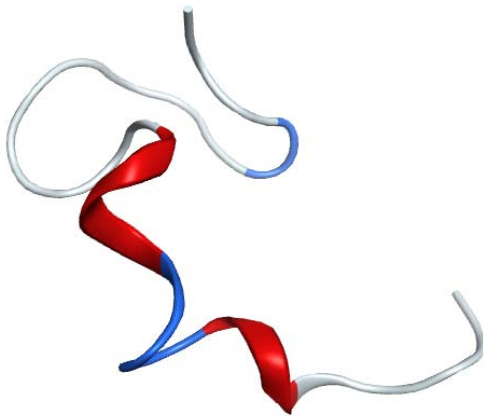**B**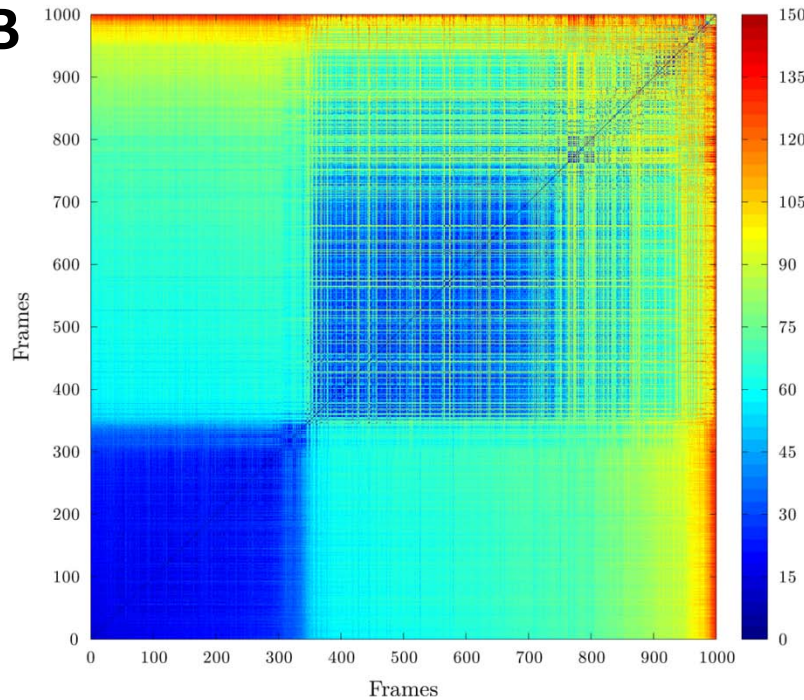**C**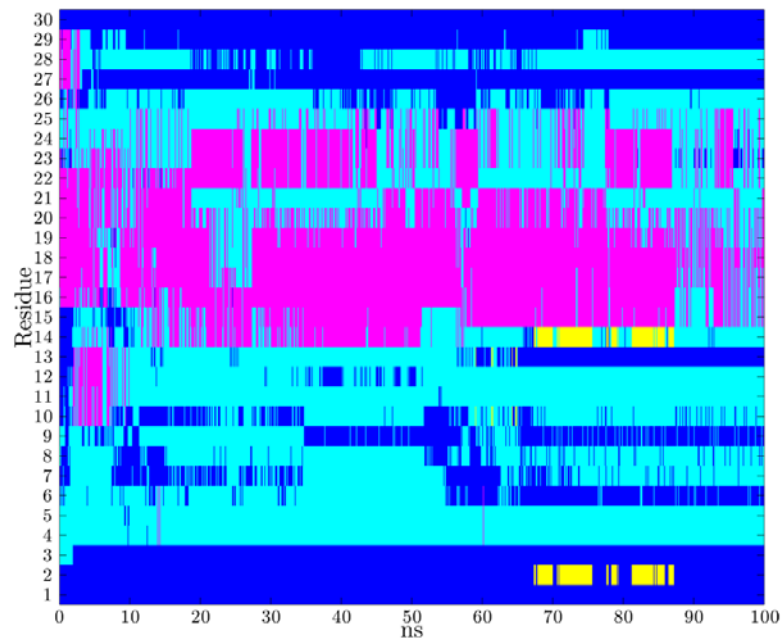

DRAMP18281



**A**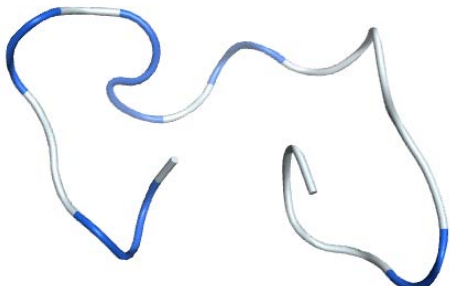**B**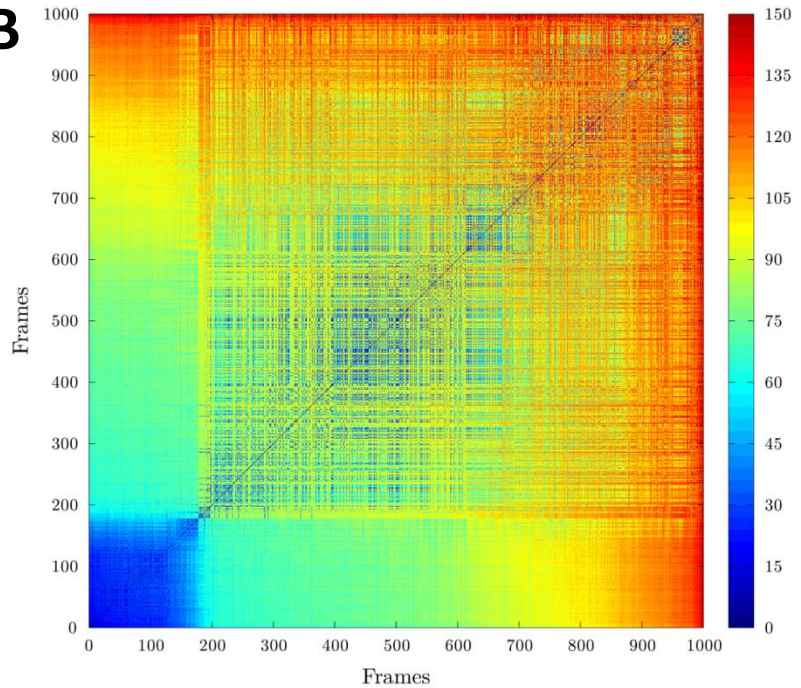

DRAMP00010

**C**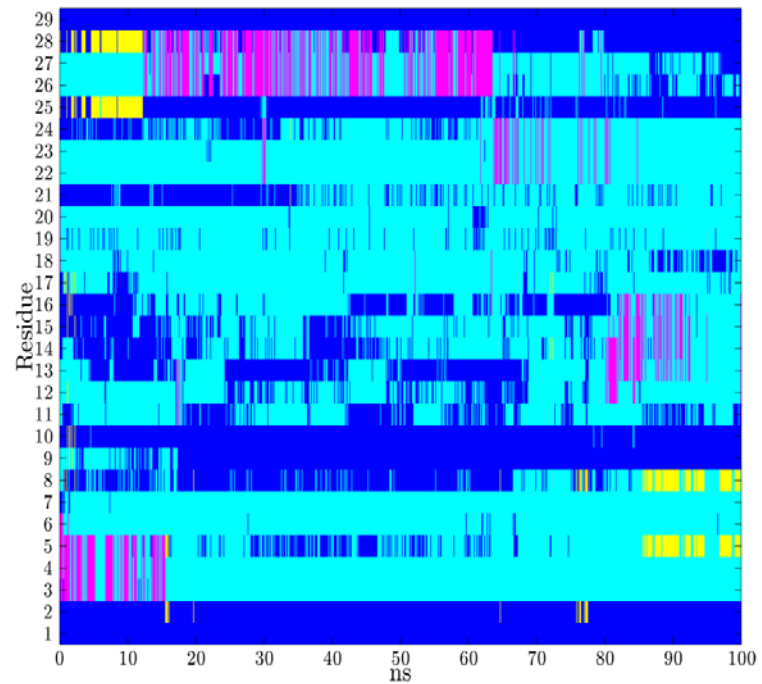

**A**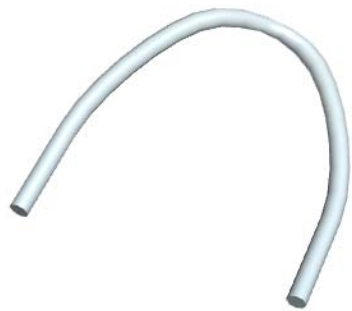**B**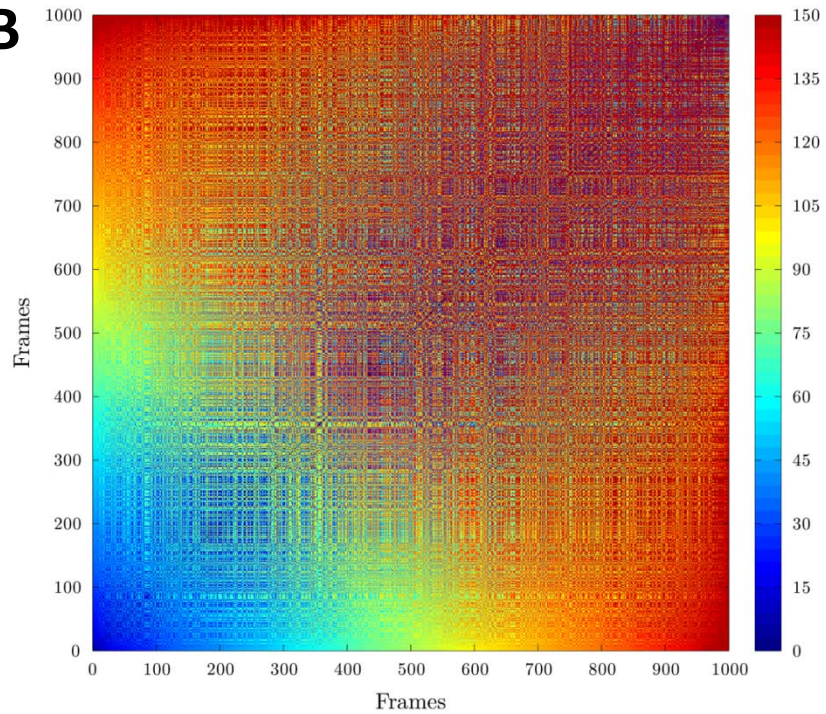**DRAMP1828****C**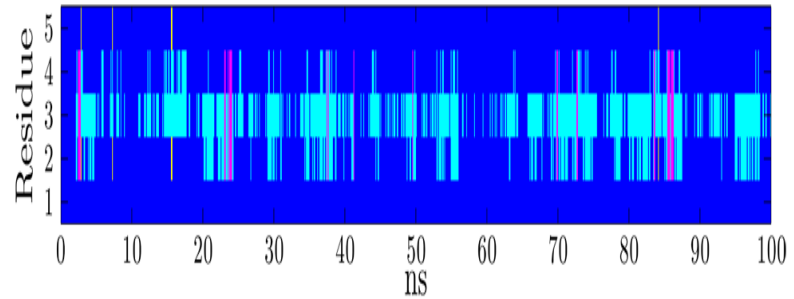

**A**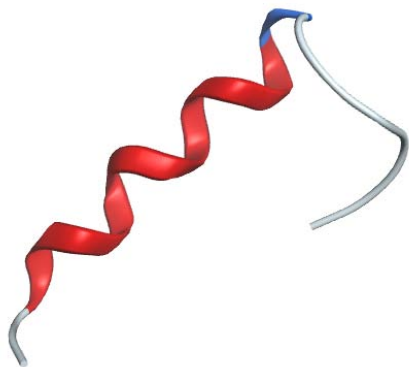**B**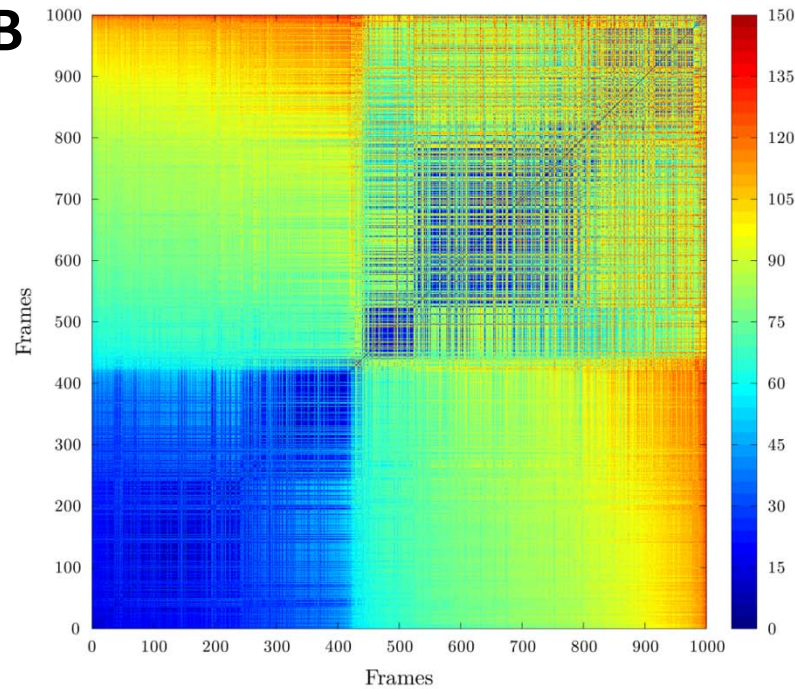**C**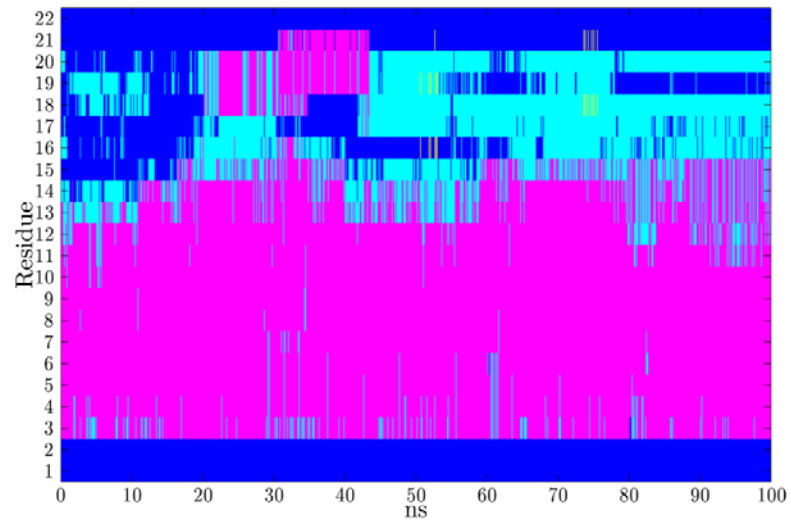

DRAMP18283



**A**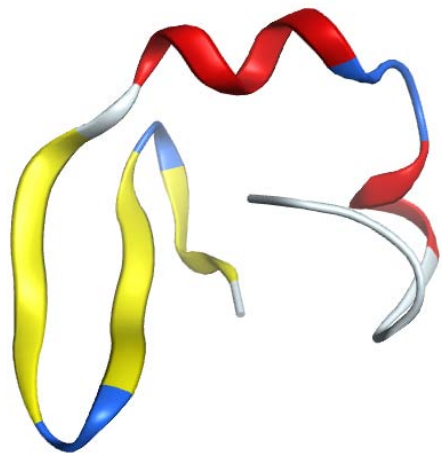**B**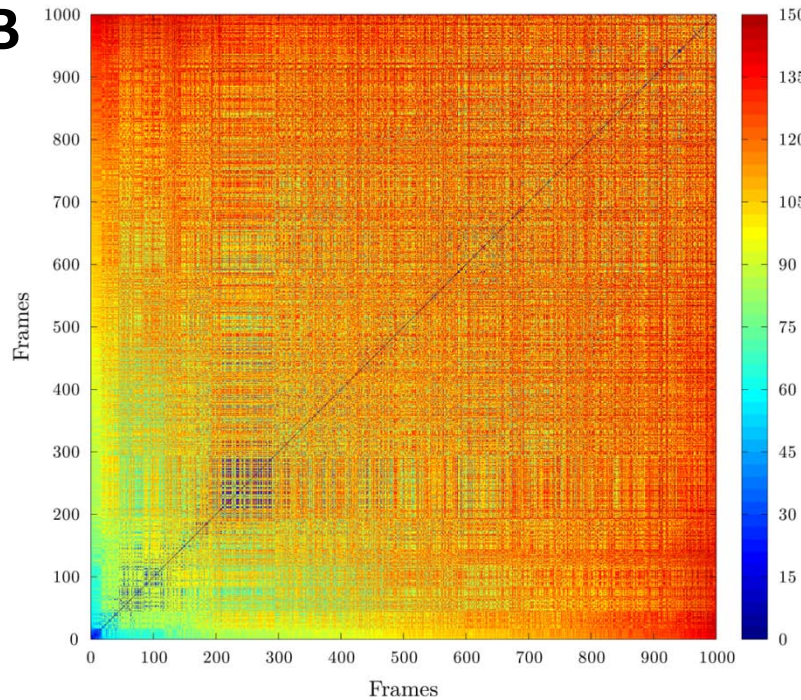

DRAMP00100

**C**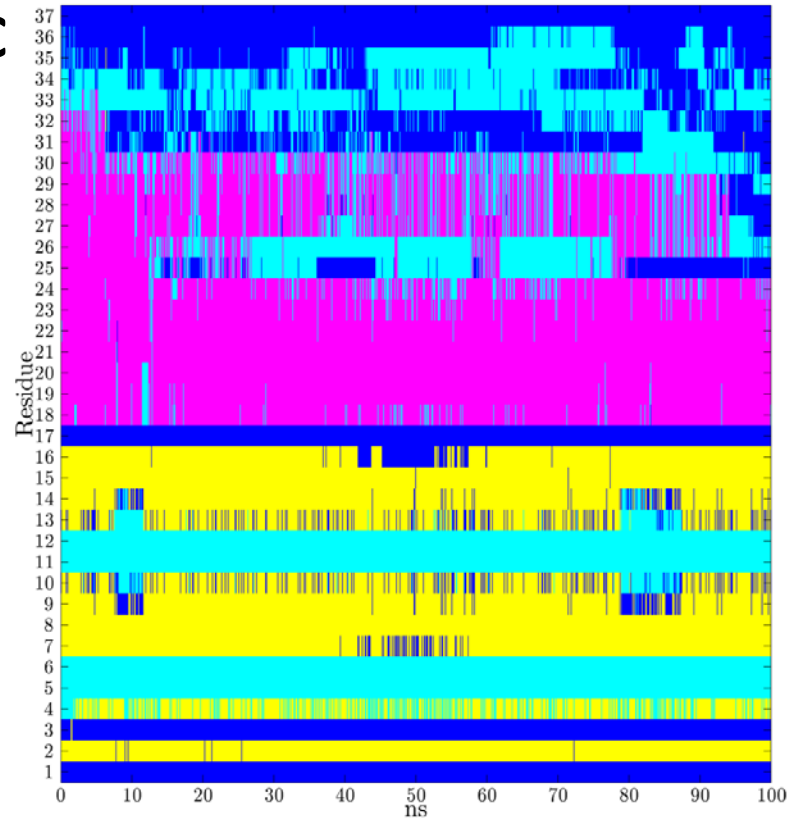



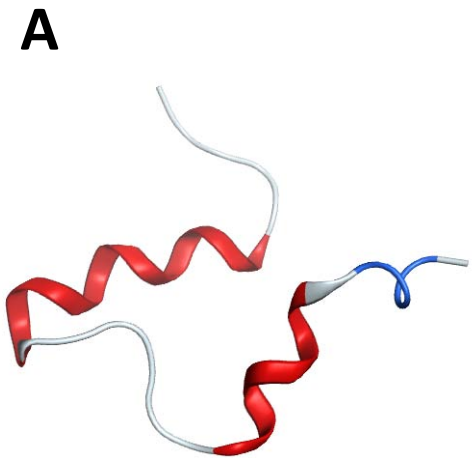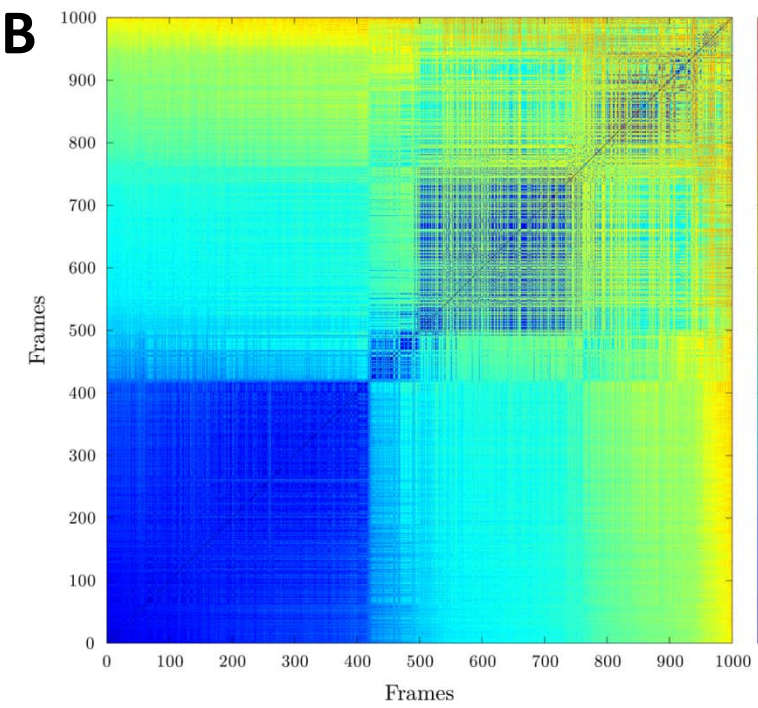

DRAMP00213

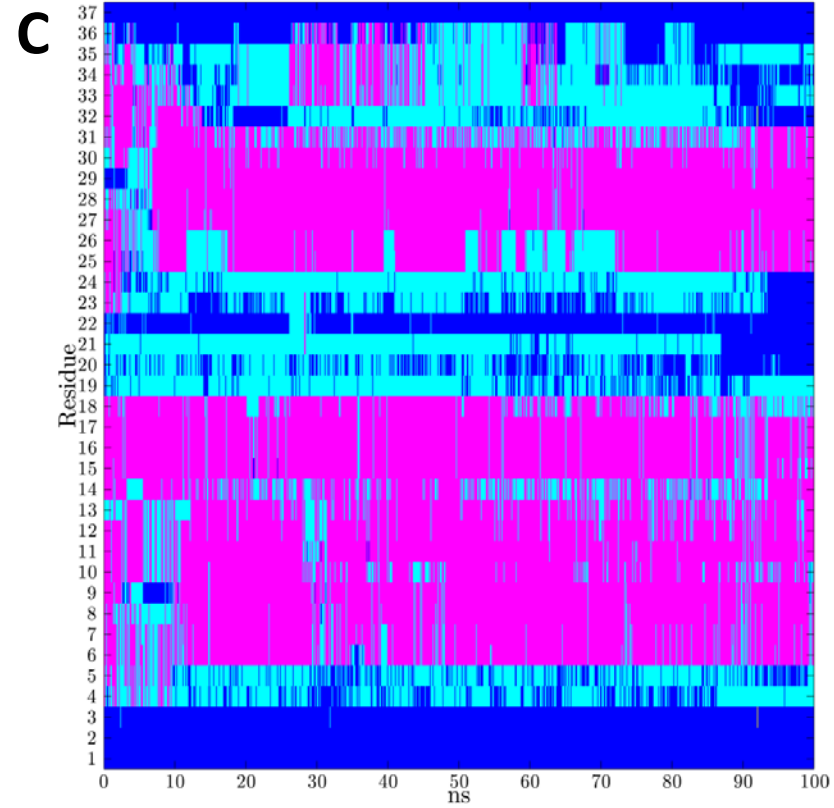

**A**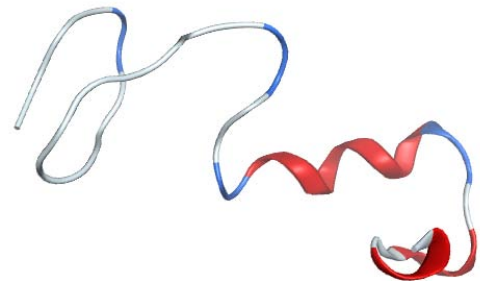**B**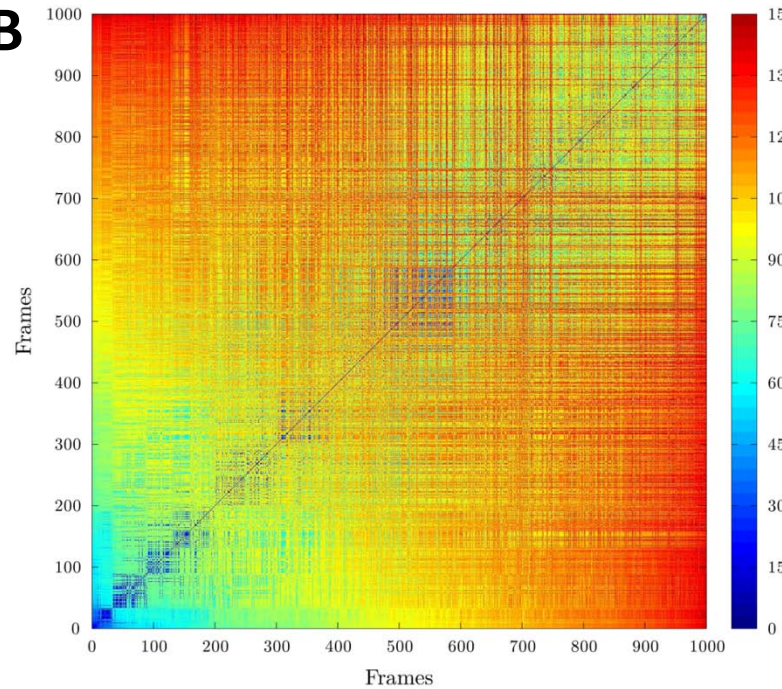

DRAMP00101

**C**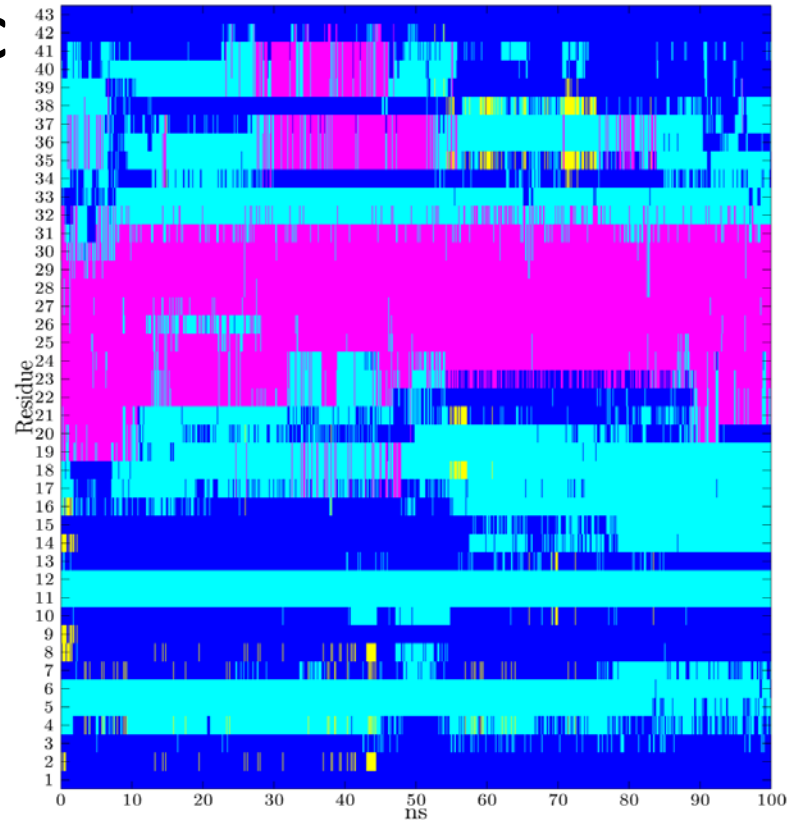

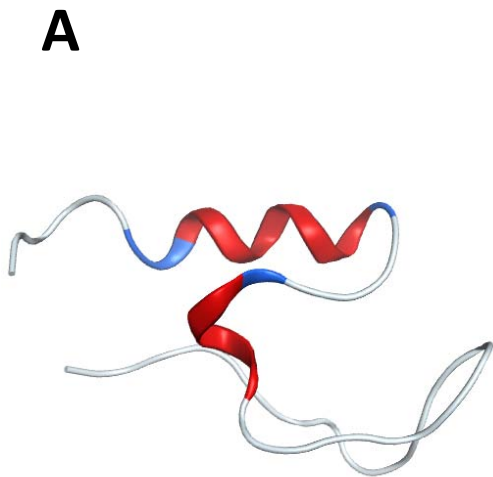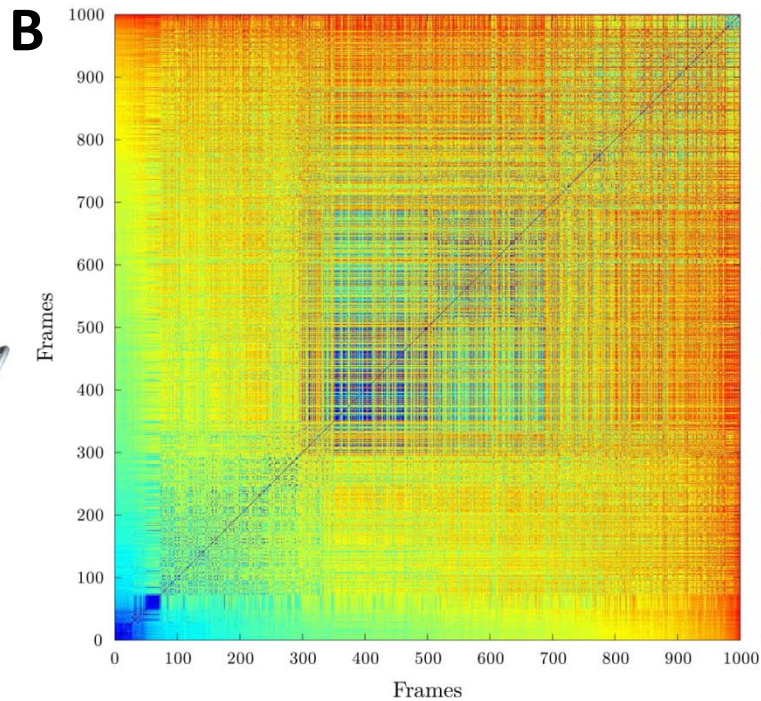

DRAMP00082

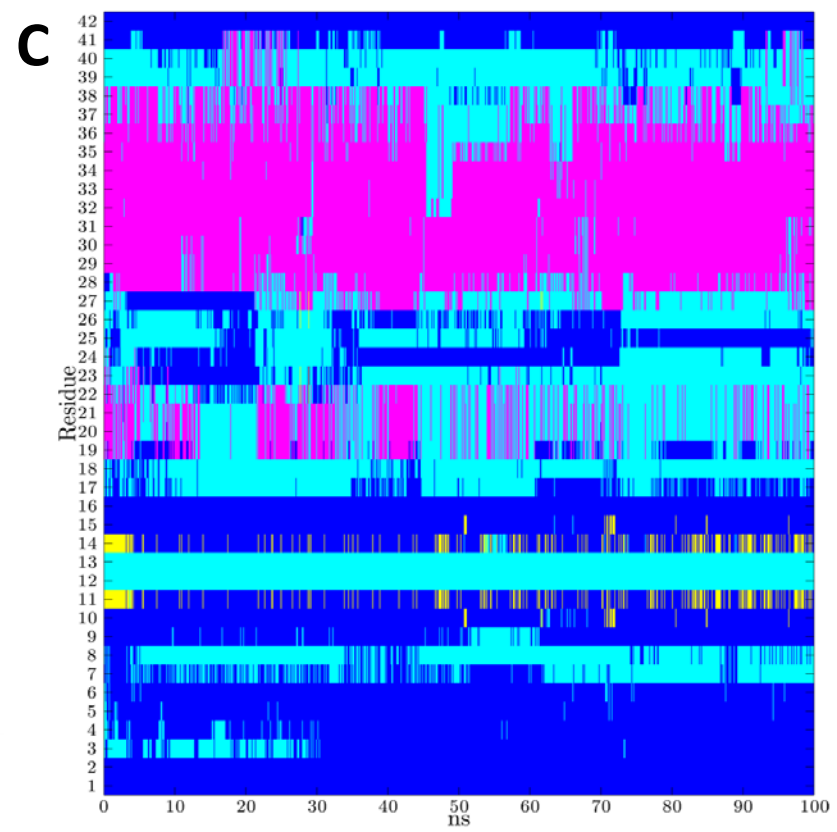

**A**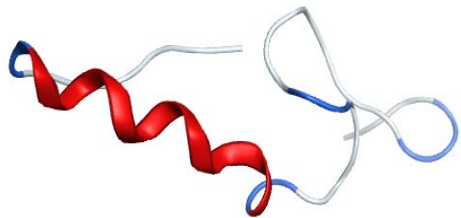**B**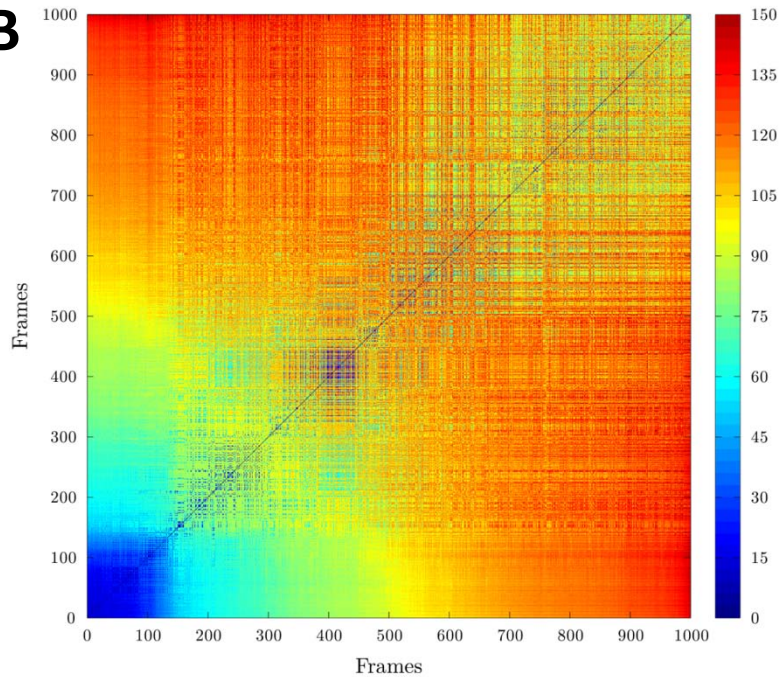

DRAMP00083

**C**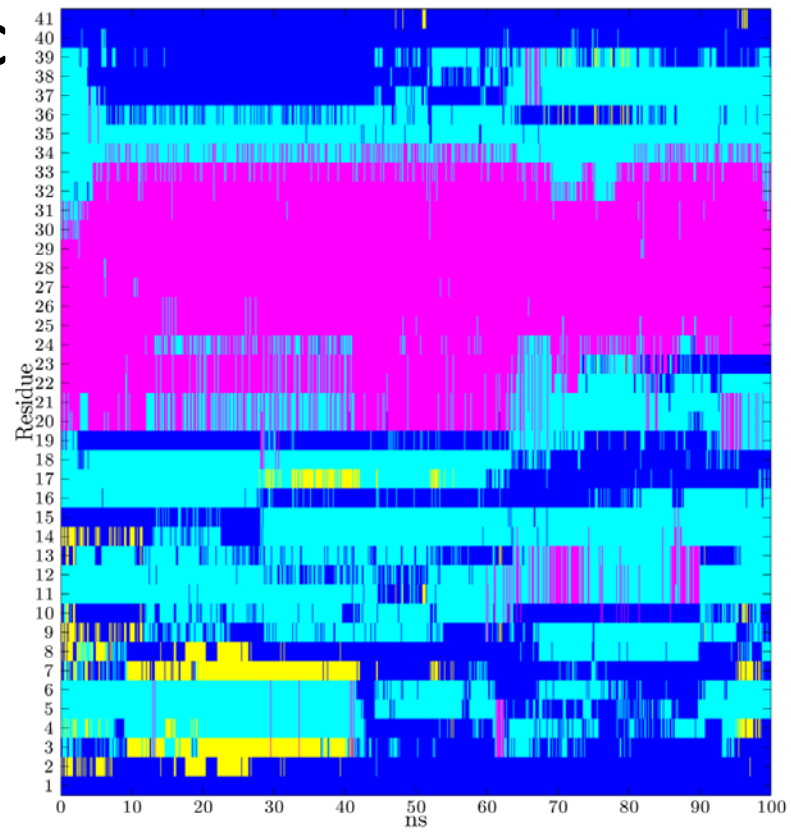



**A**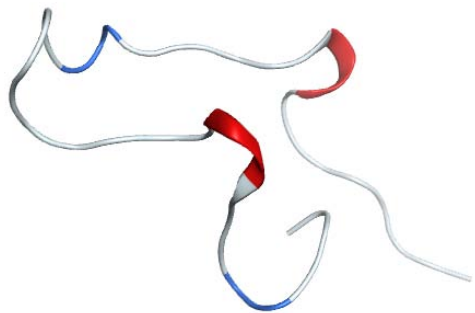**B**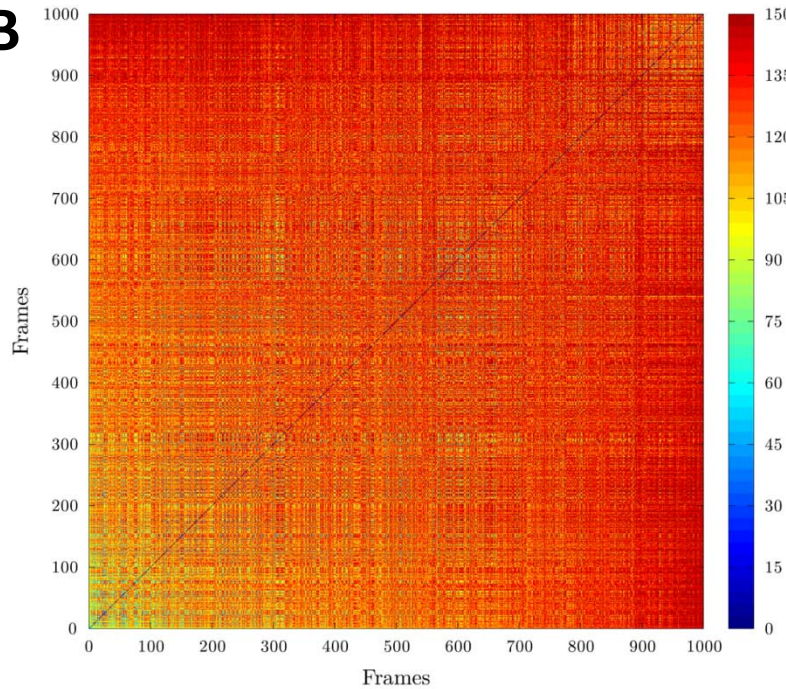

DRAMP18285

**C**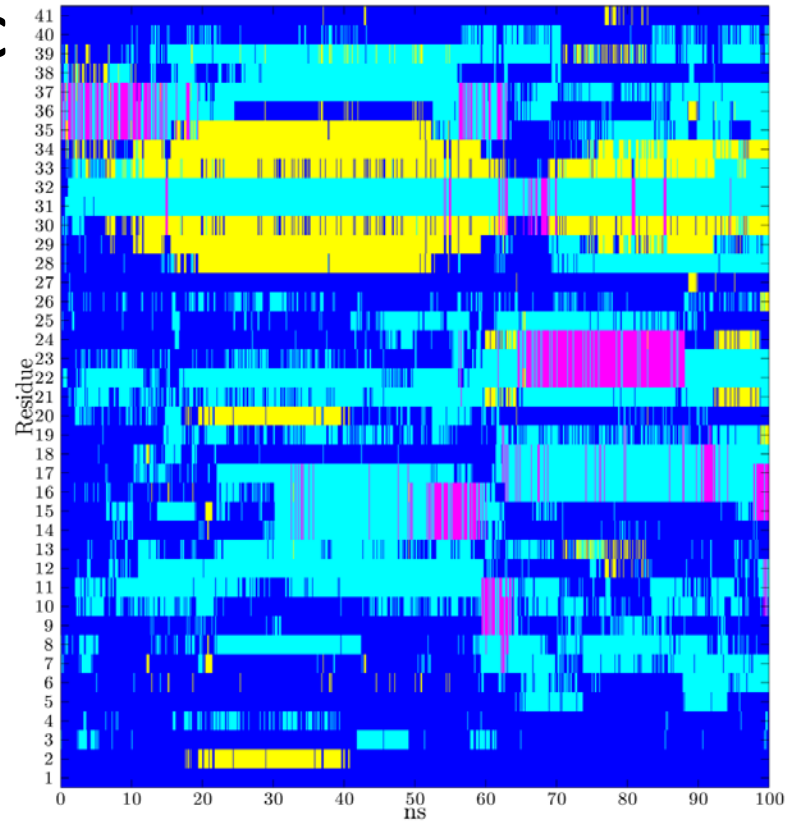

**A**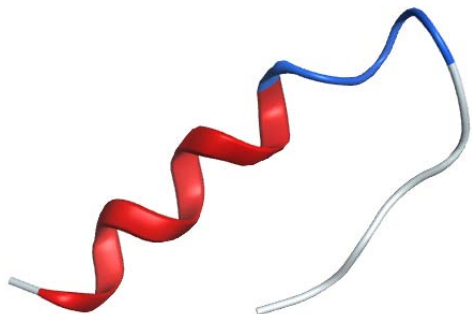**B**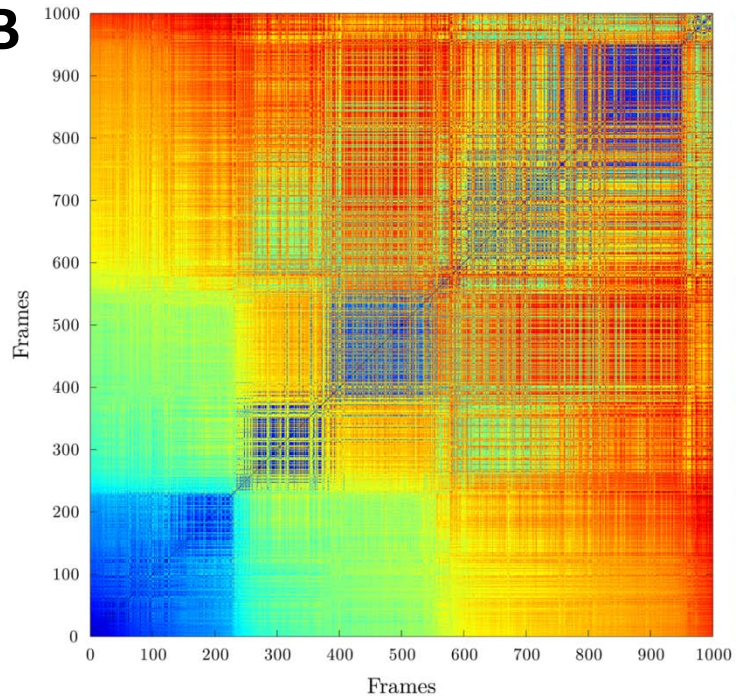**C**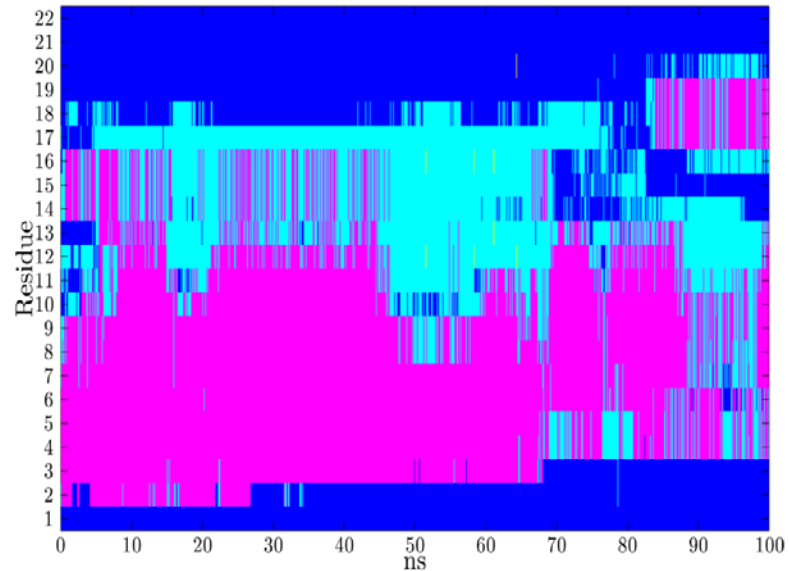

DRAMP18289

**A**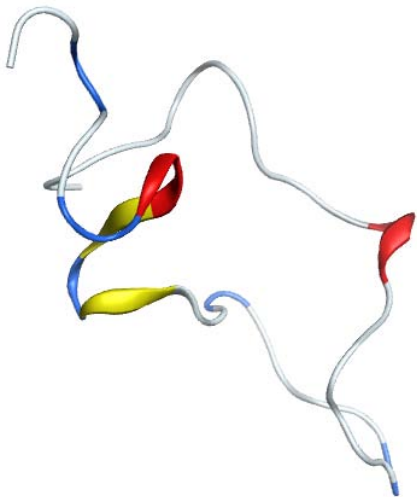**B**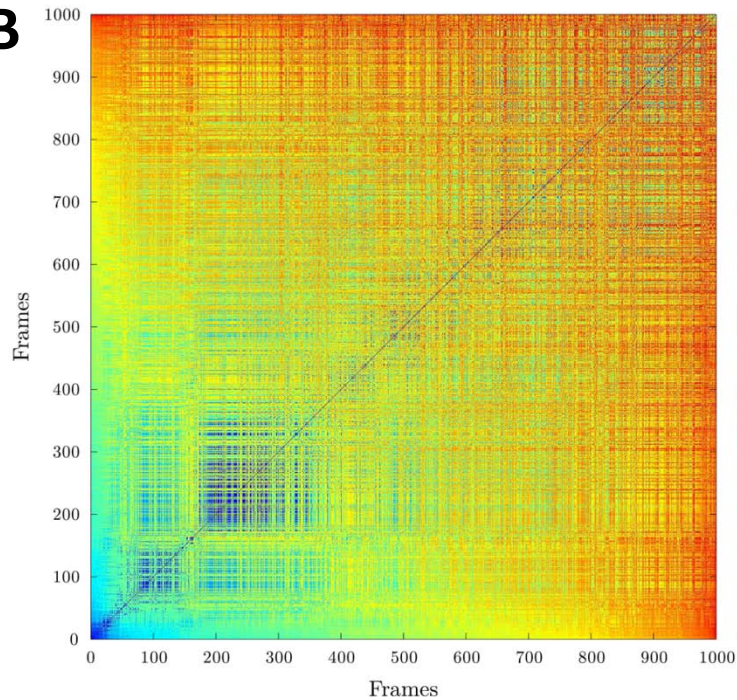

DRAMP00069

**C**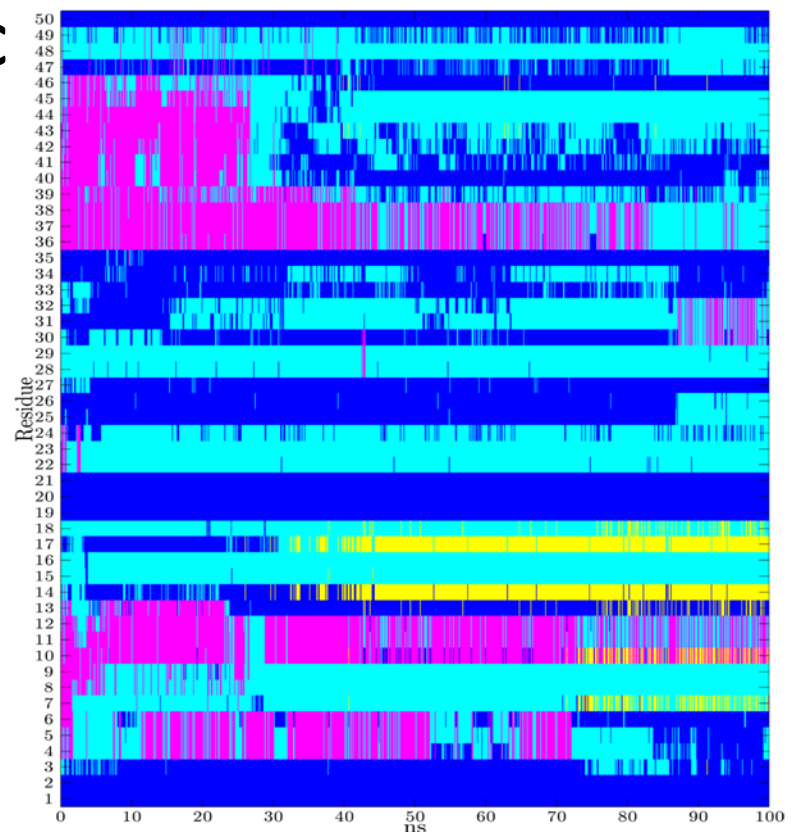



**A**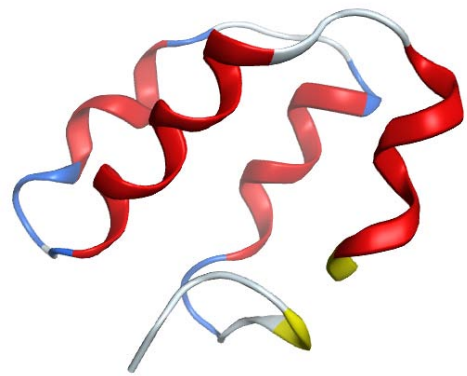**B**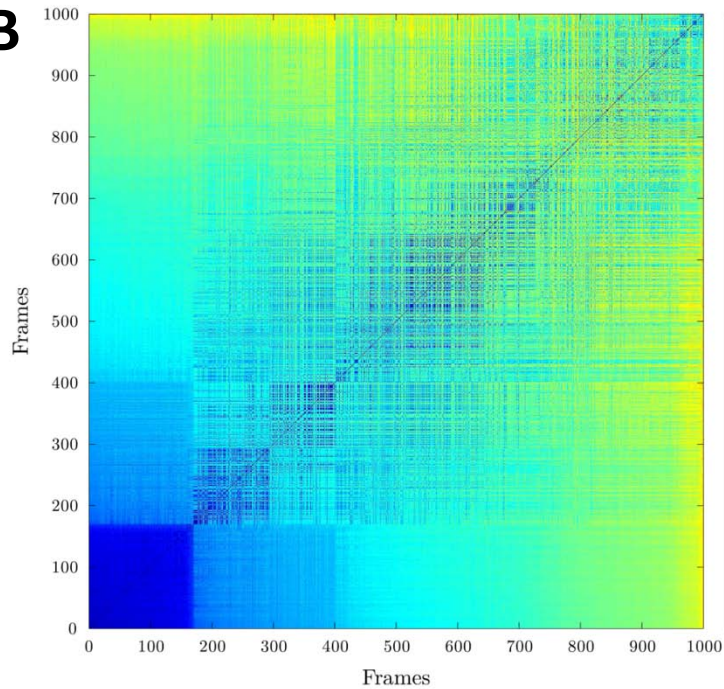

DRAMP00172

**C**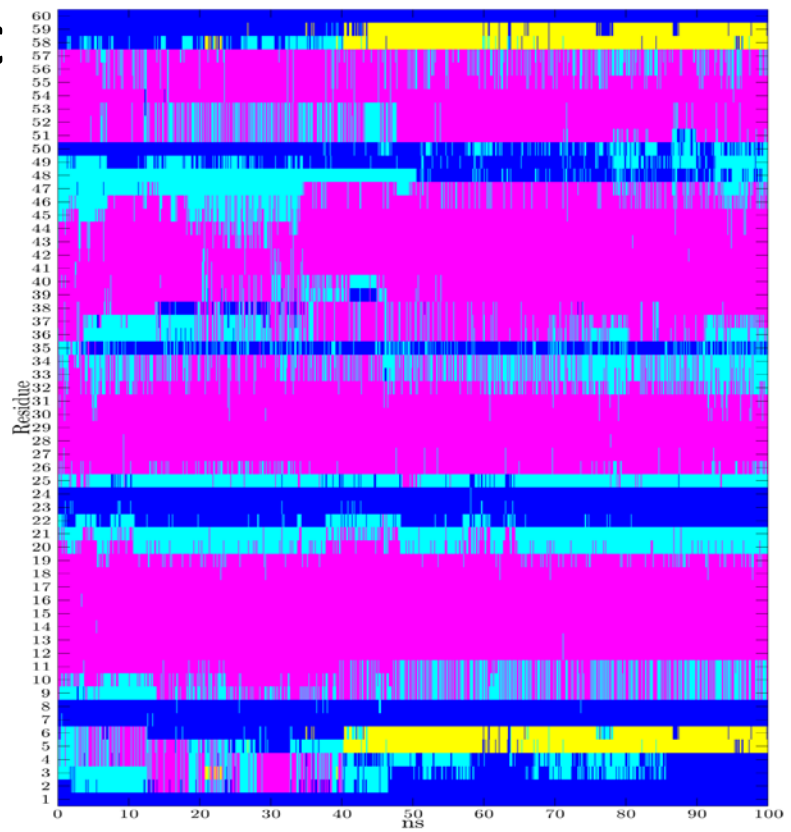



**A**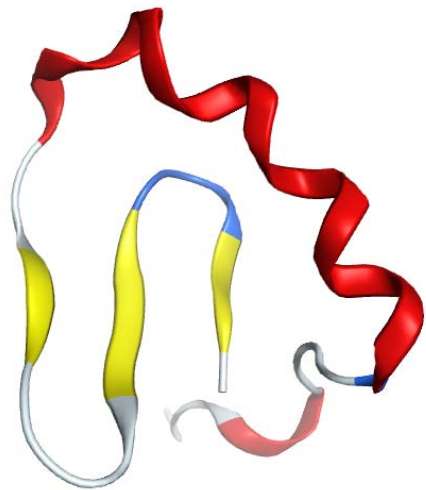**B**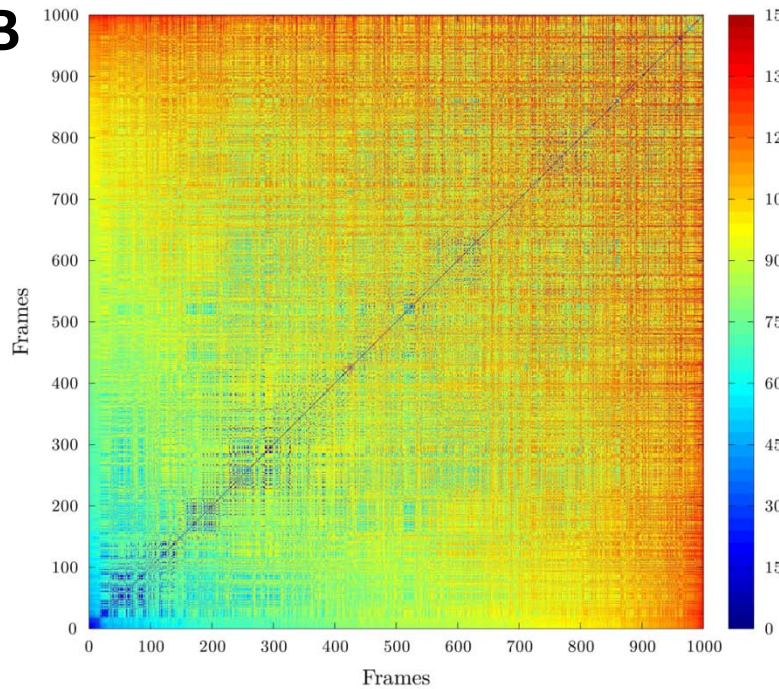

DRAMP18291

**C**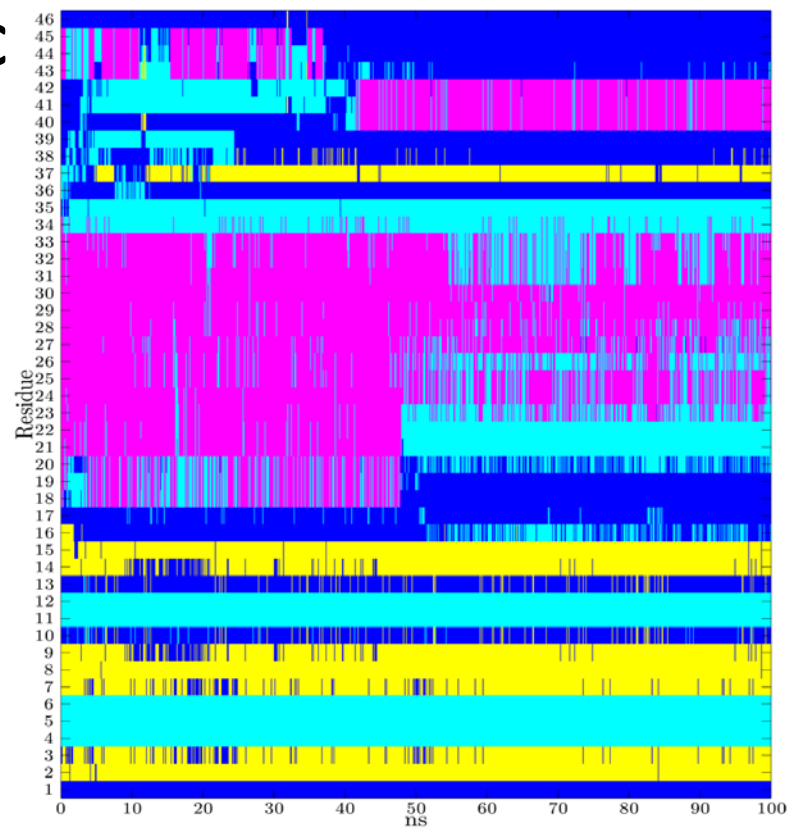

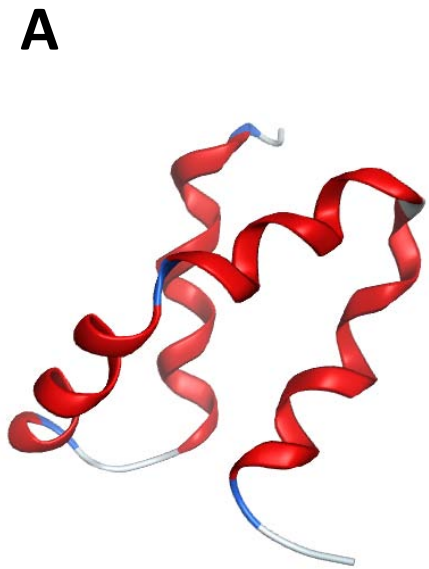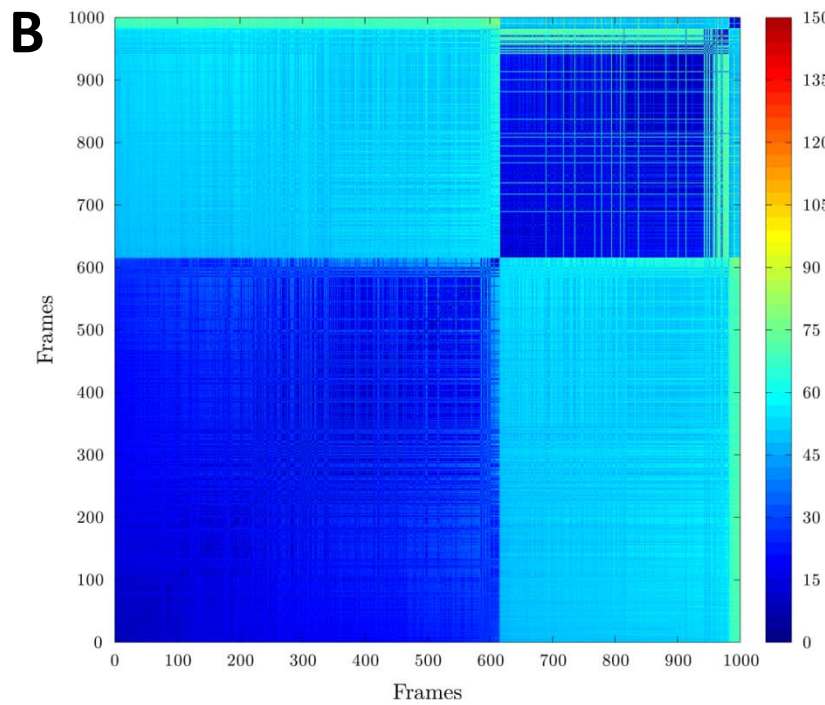

DRAMP00258

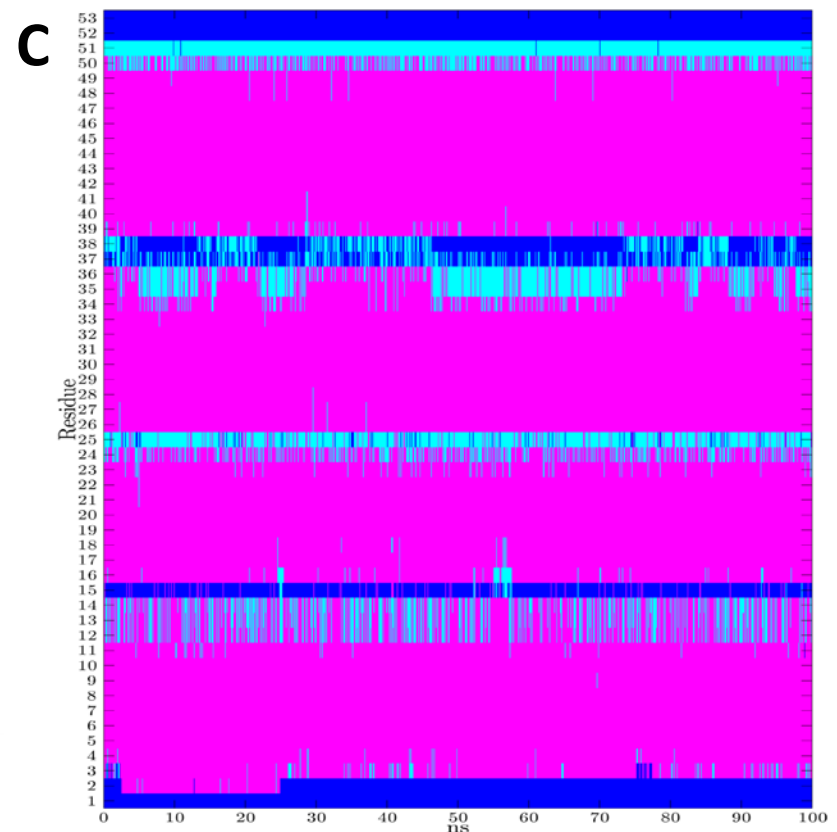

**A**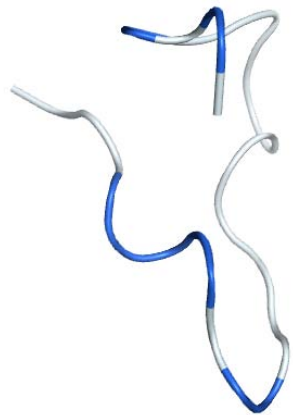**B**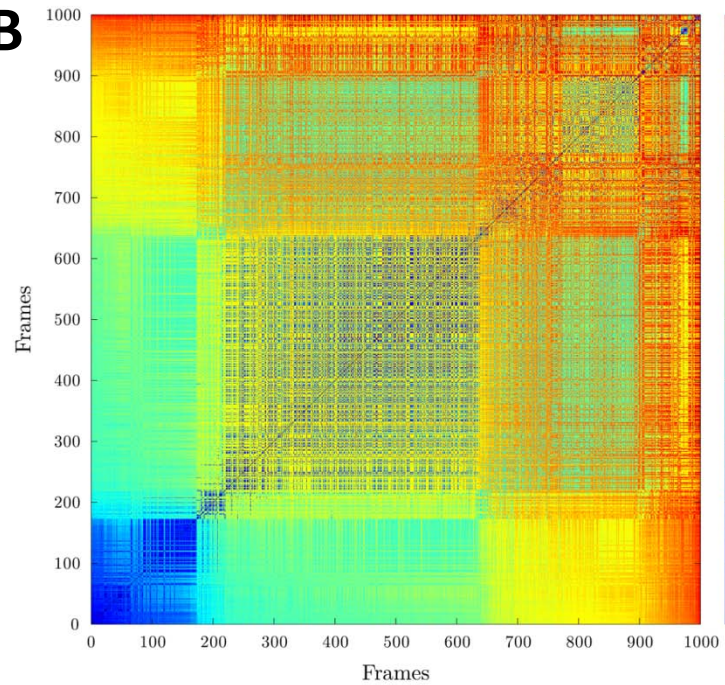

DRAMP00008

**C**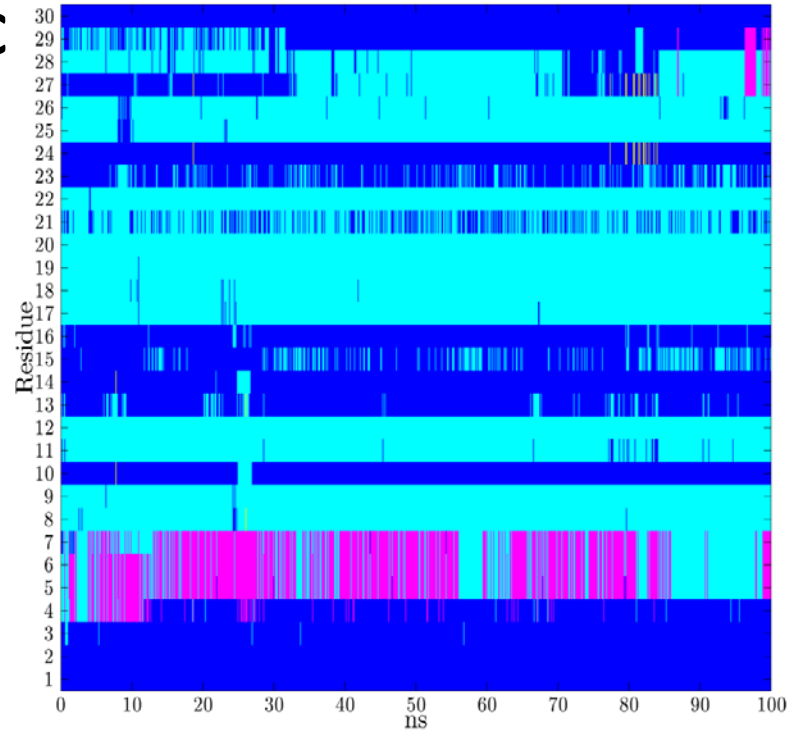

**A**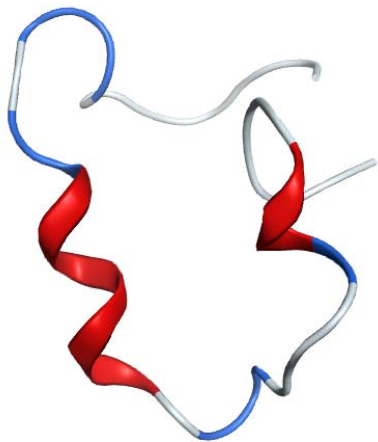**B**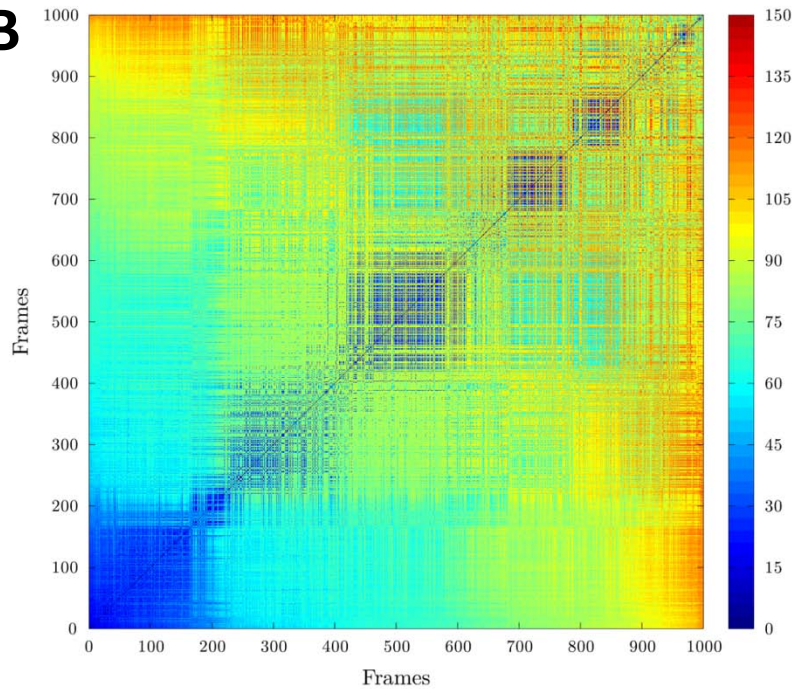

DRAMP00097

**C**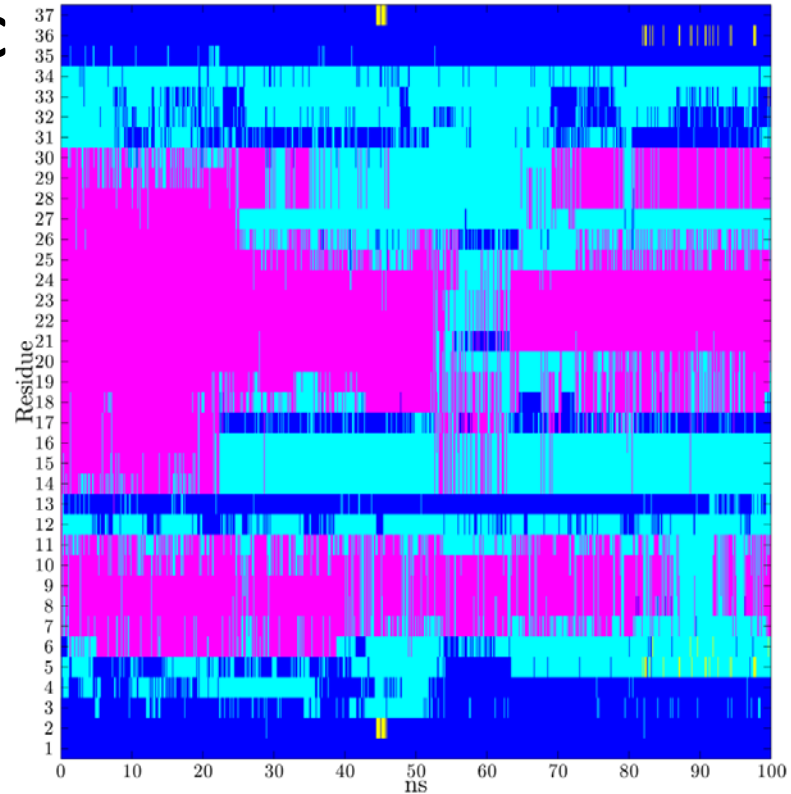



**A**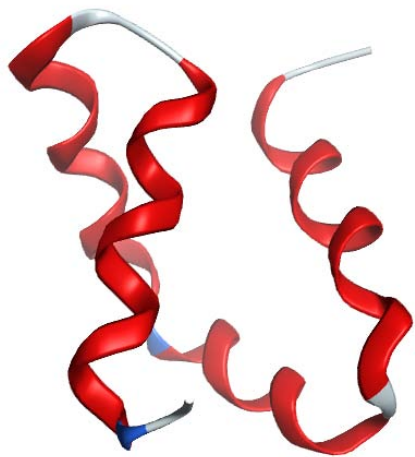**B**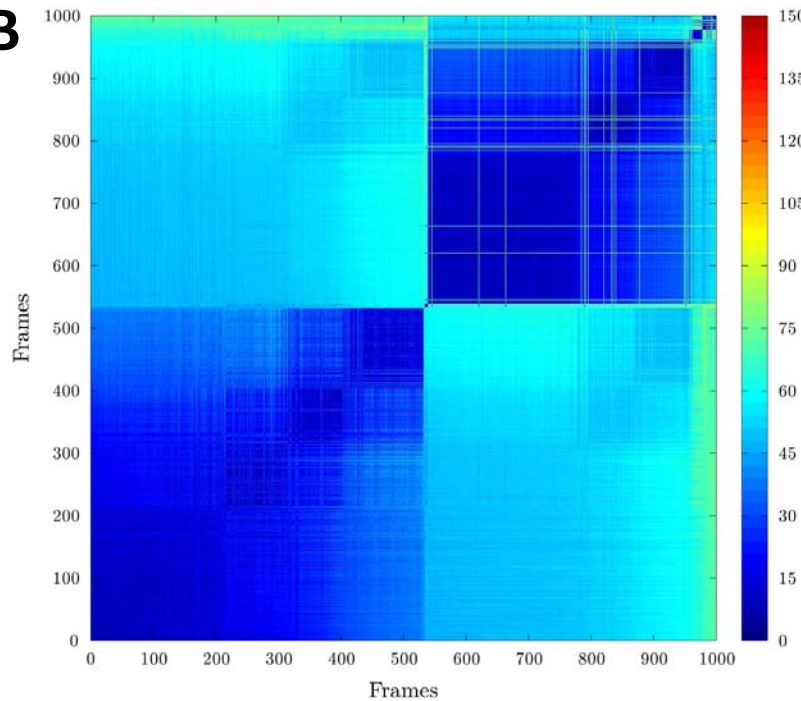

DRAMP12866

**C**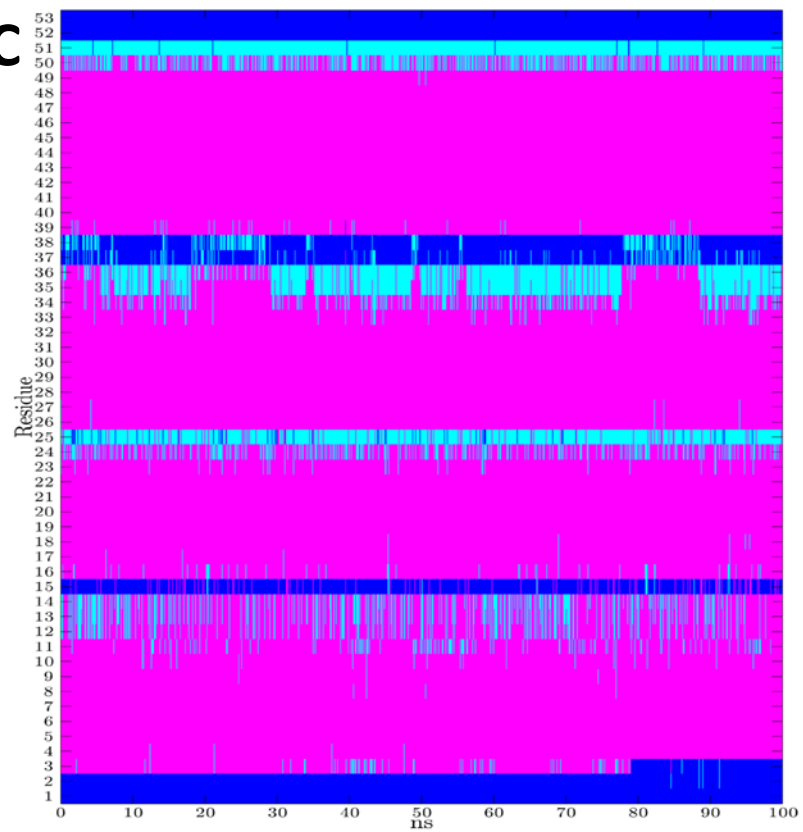

**A**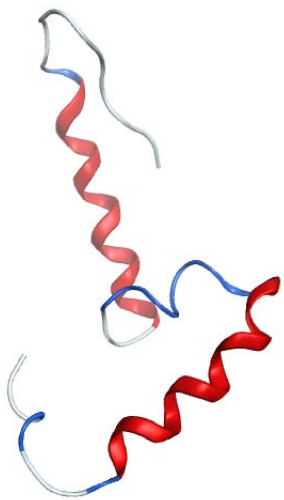**B**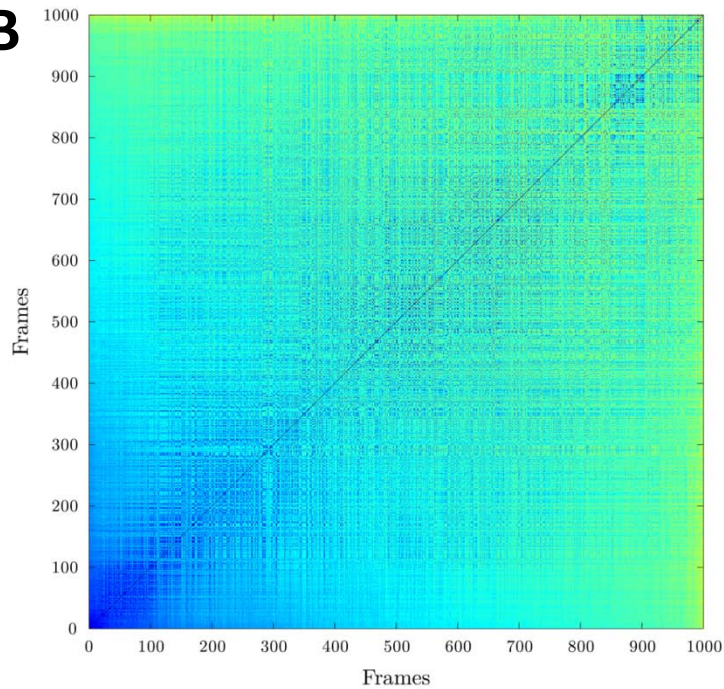

DRAMP00171

**C**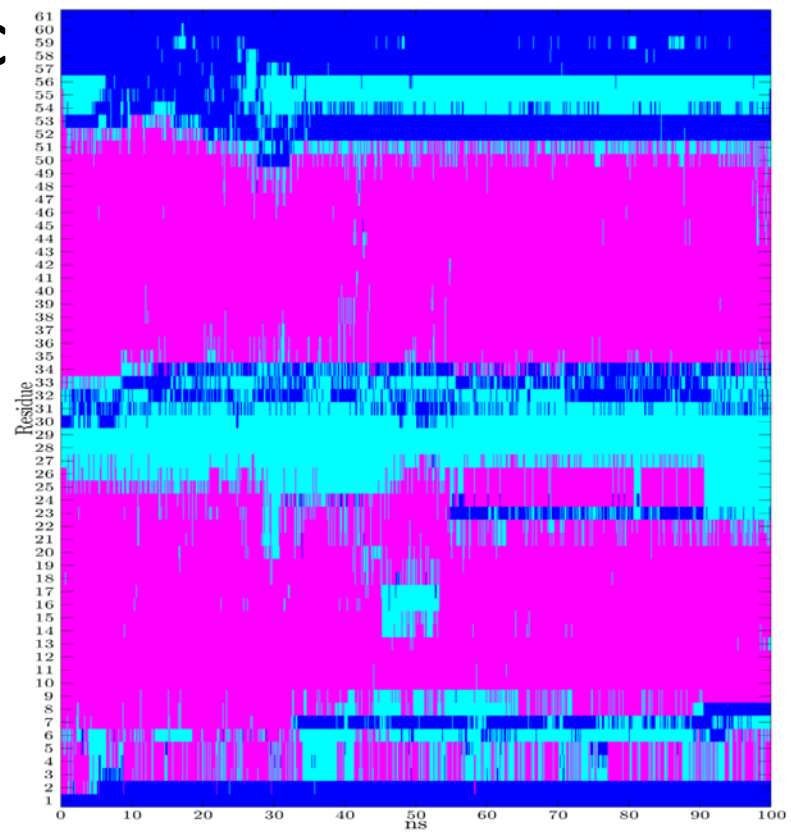

**A**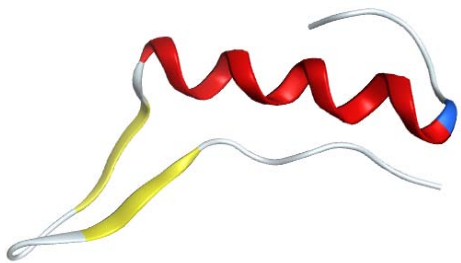**B**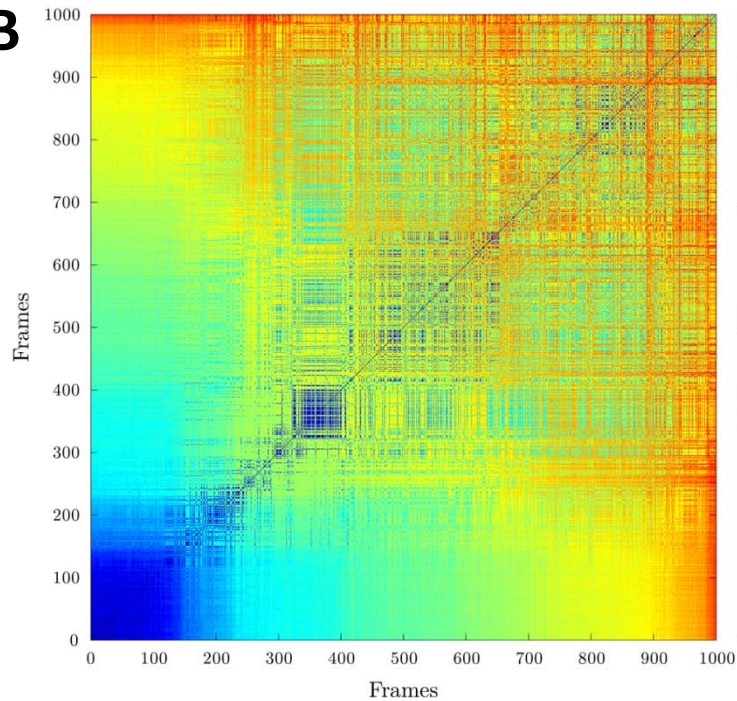

DRAMP00095

**C**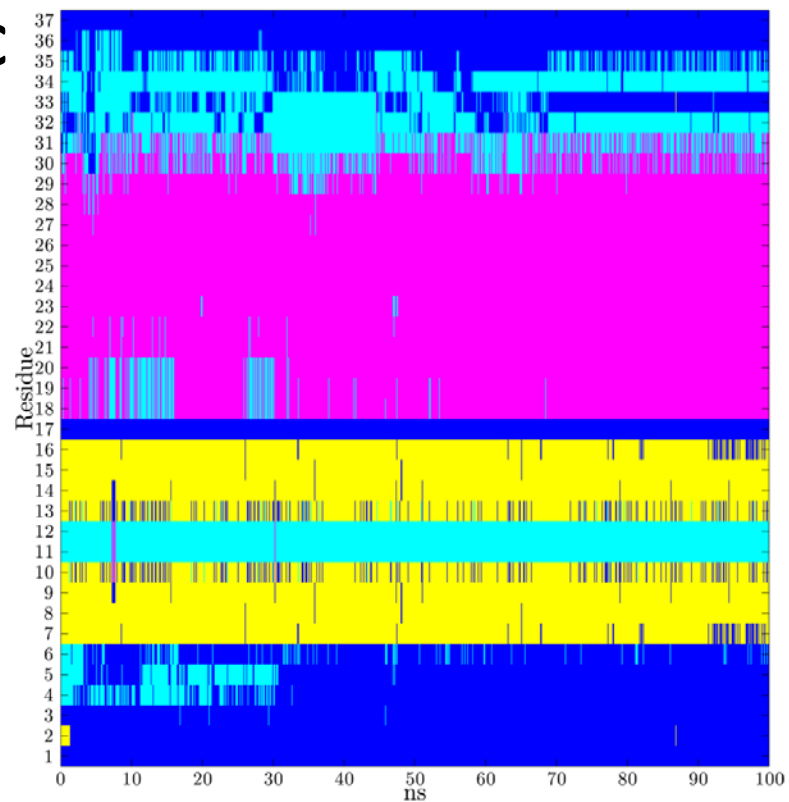

**A**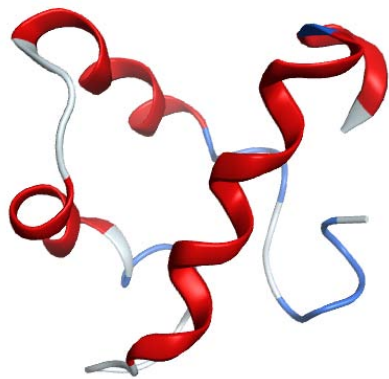**B**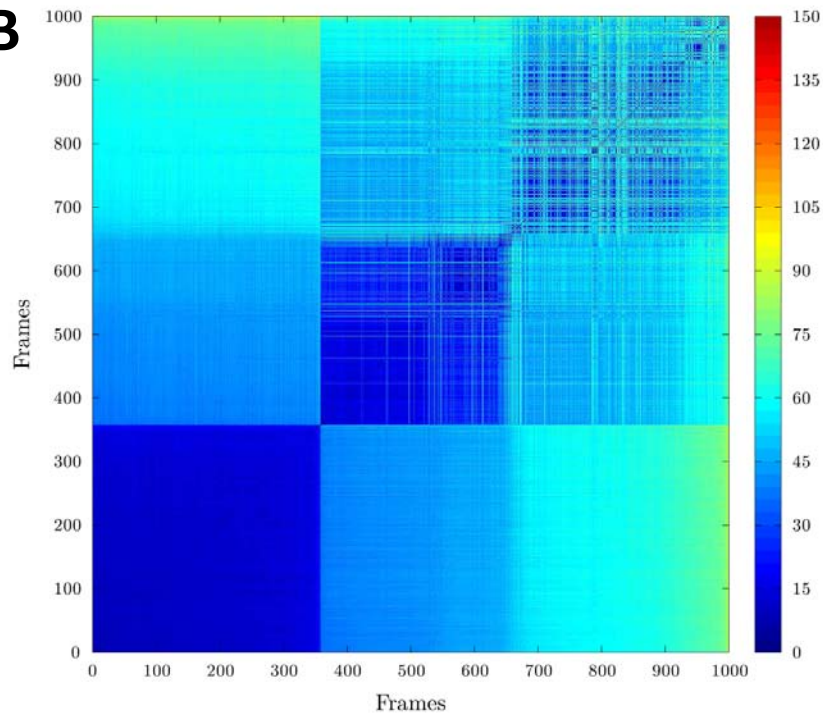

DRAMP00173

**C**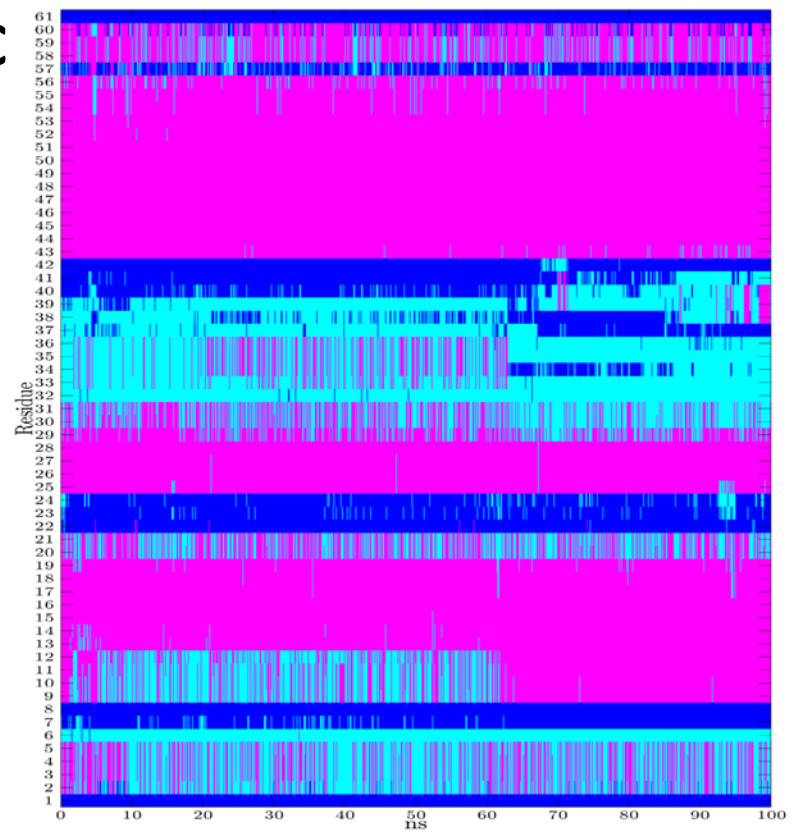



**A**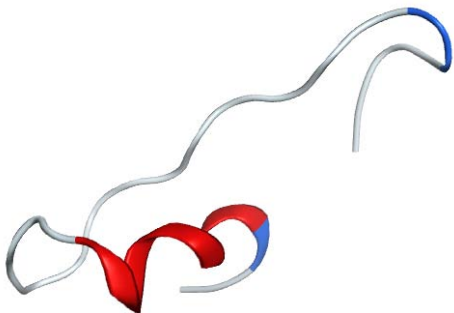**B**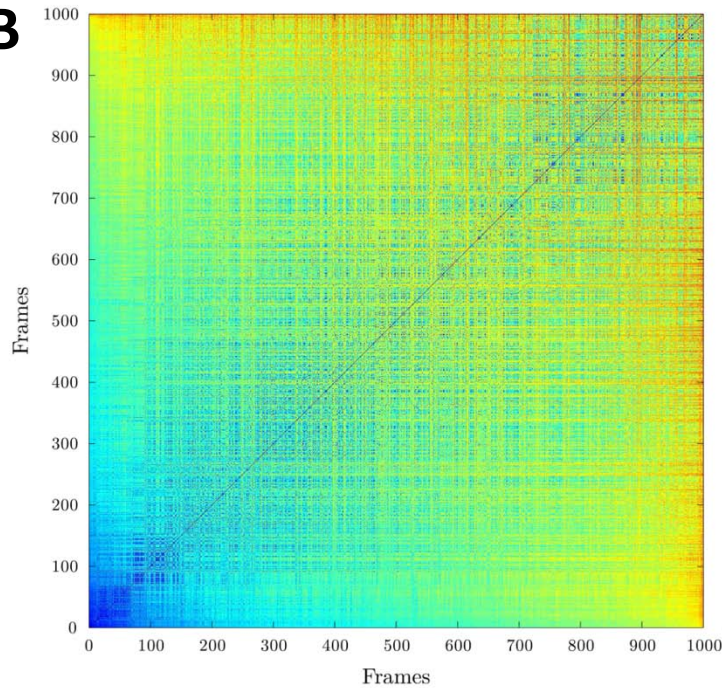

DRAMP00189

**C**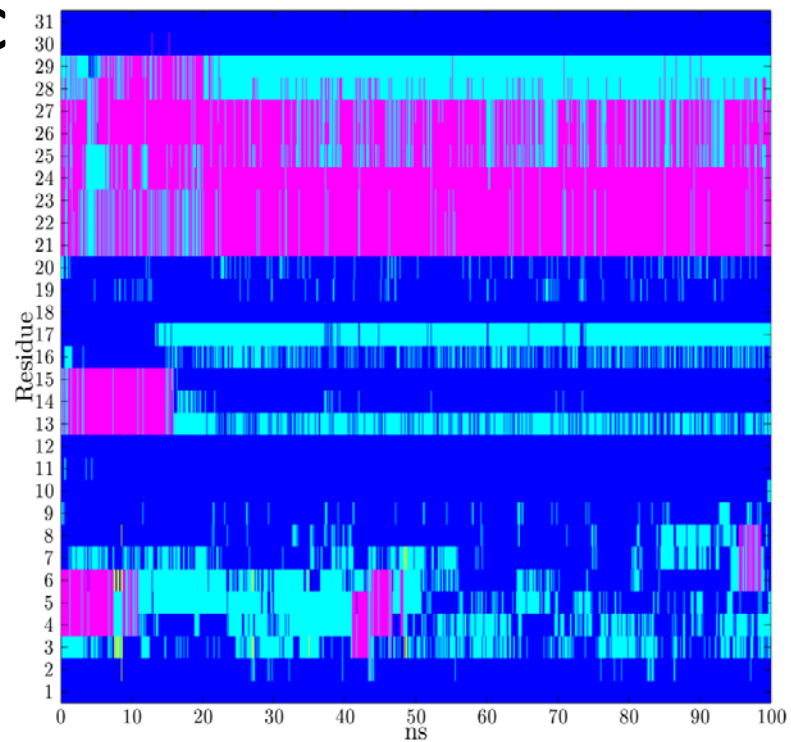

**A**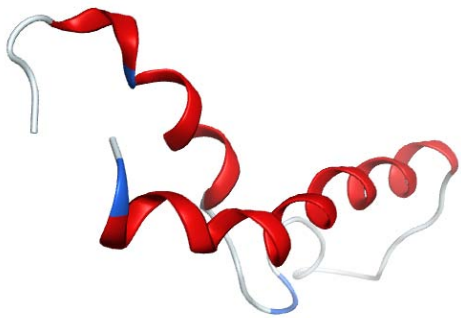**B**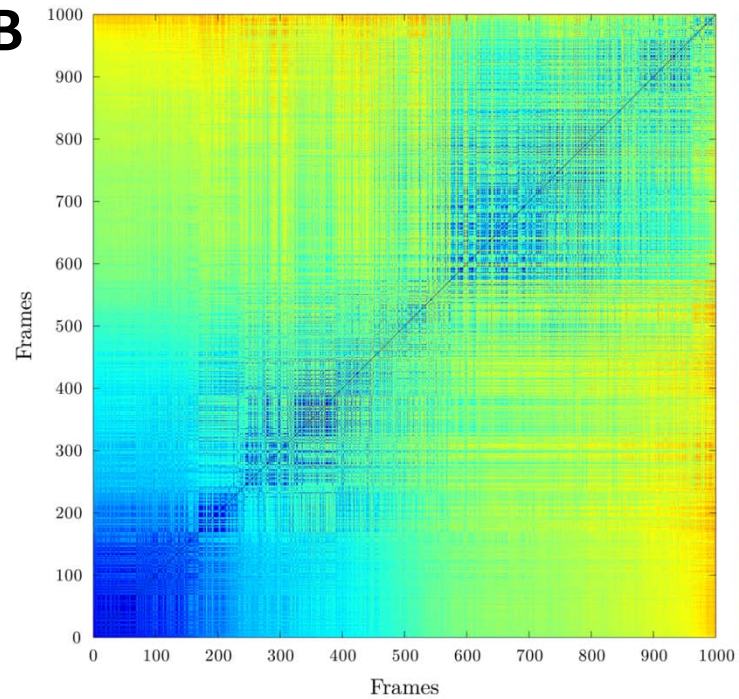

DRAMP00190

**C**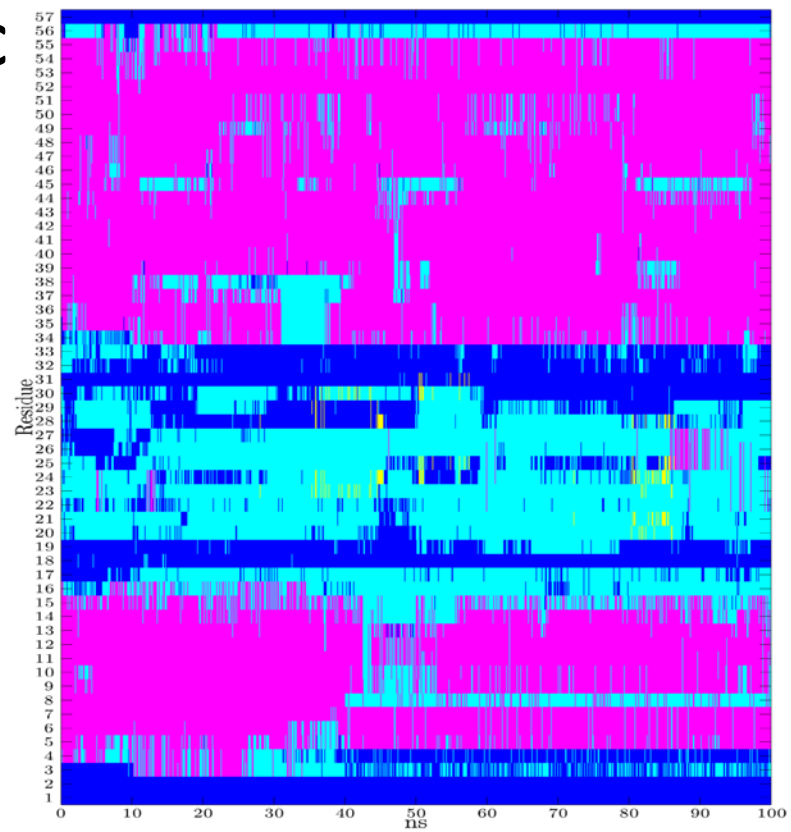

**A**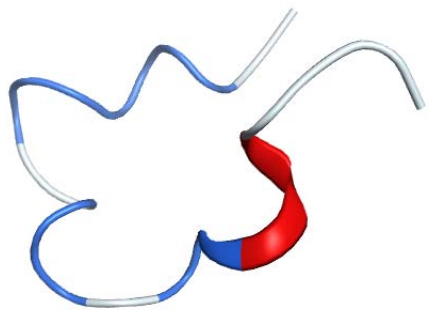**B**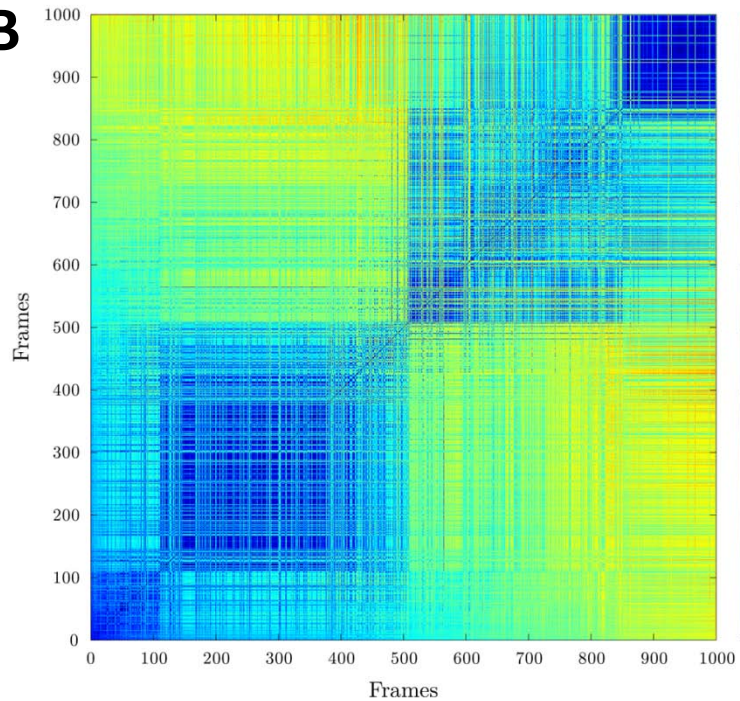

DRAMP00001

**C**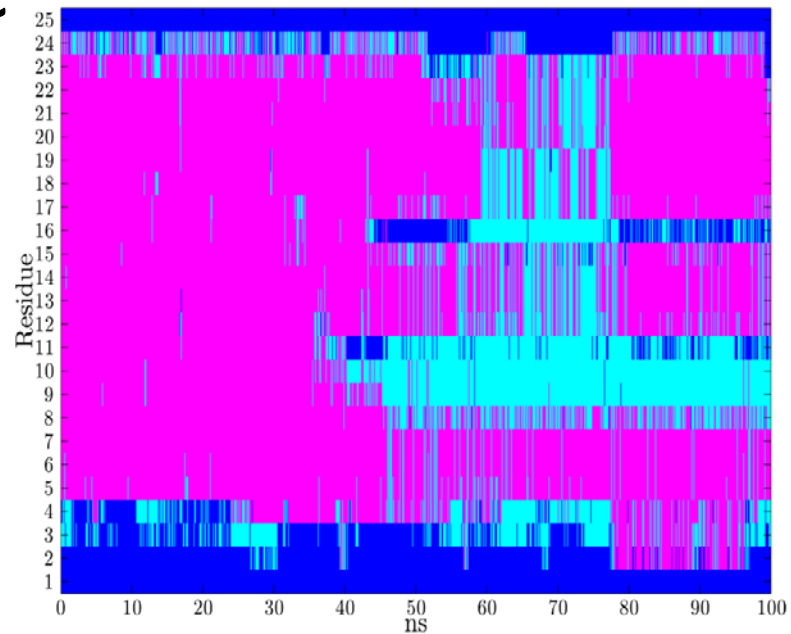

**A**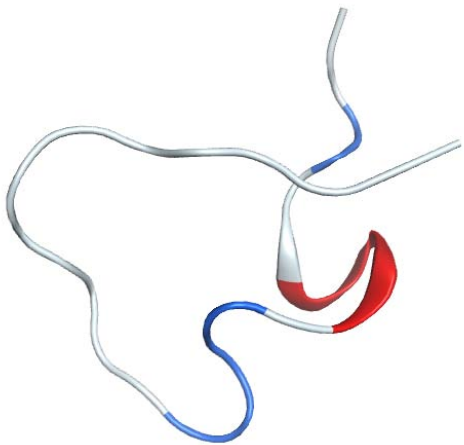**B**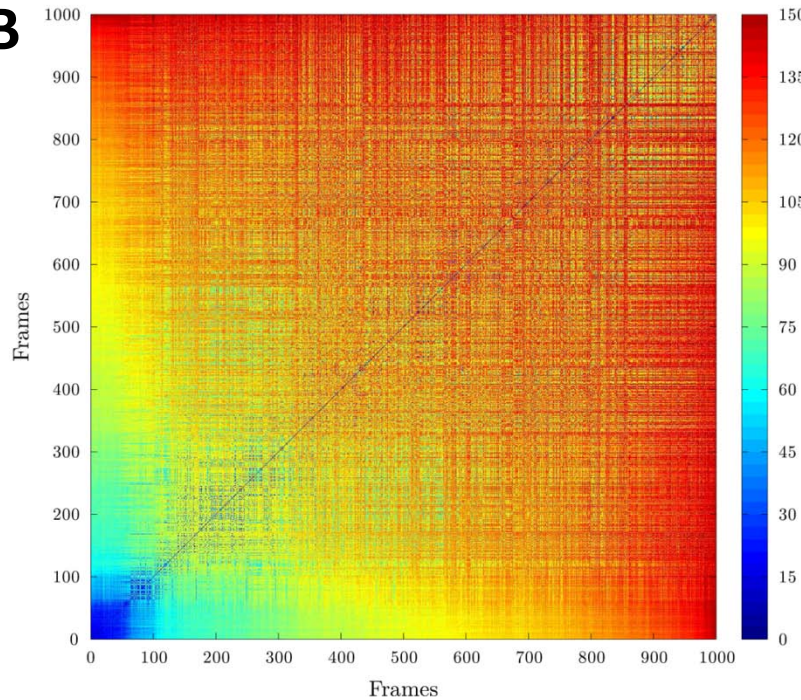

DRAMP00035

**C**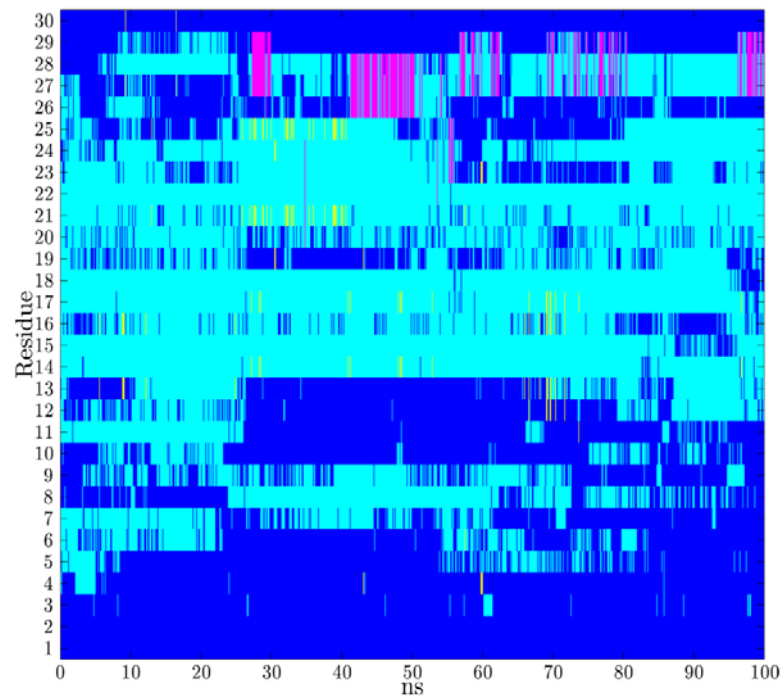



**A**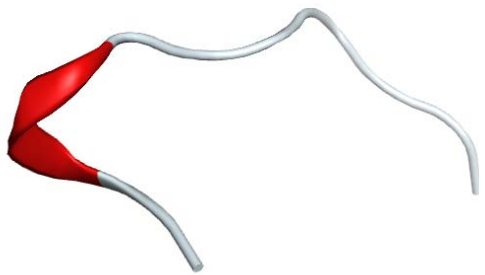**B**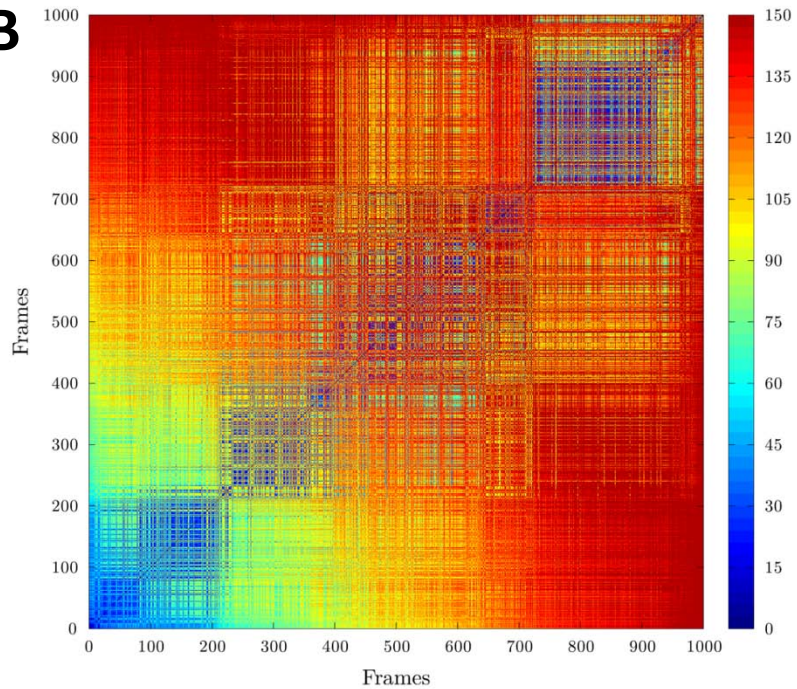

DRAMP18305

**C**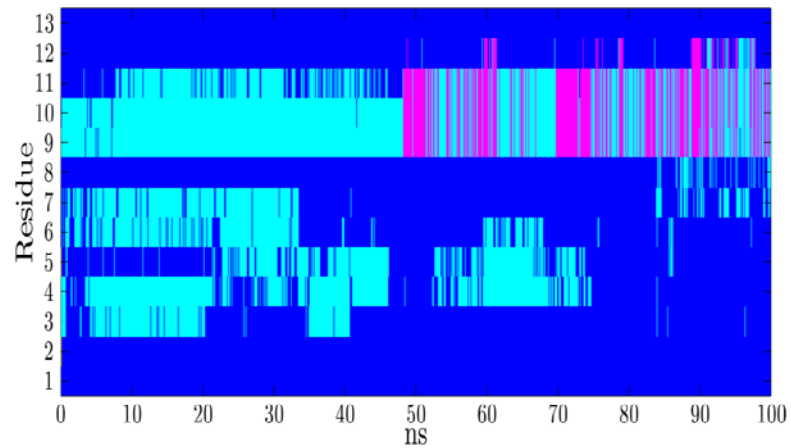

**A**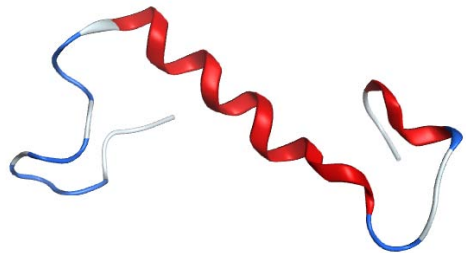**B**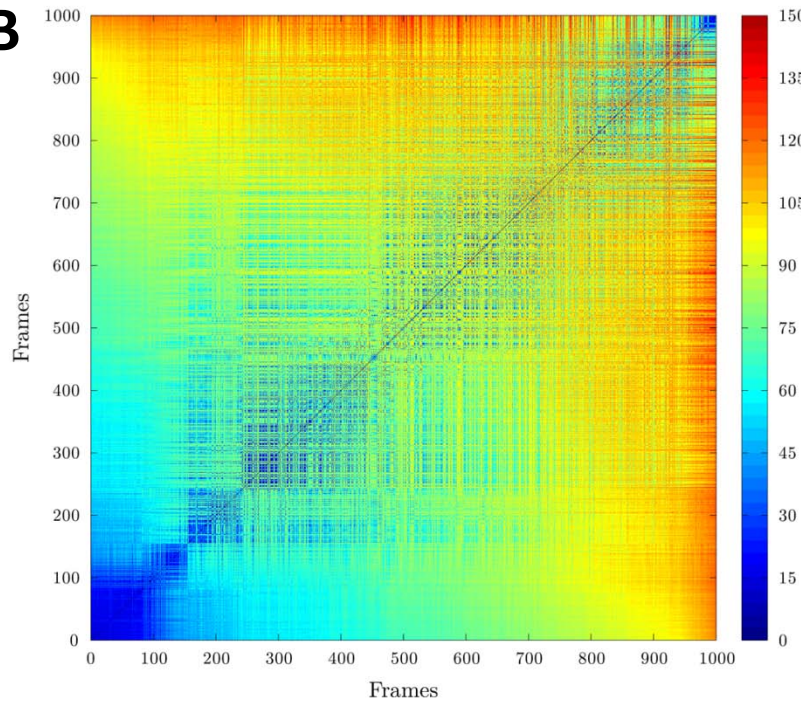

DRAMP00096

**C**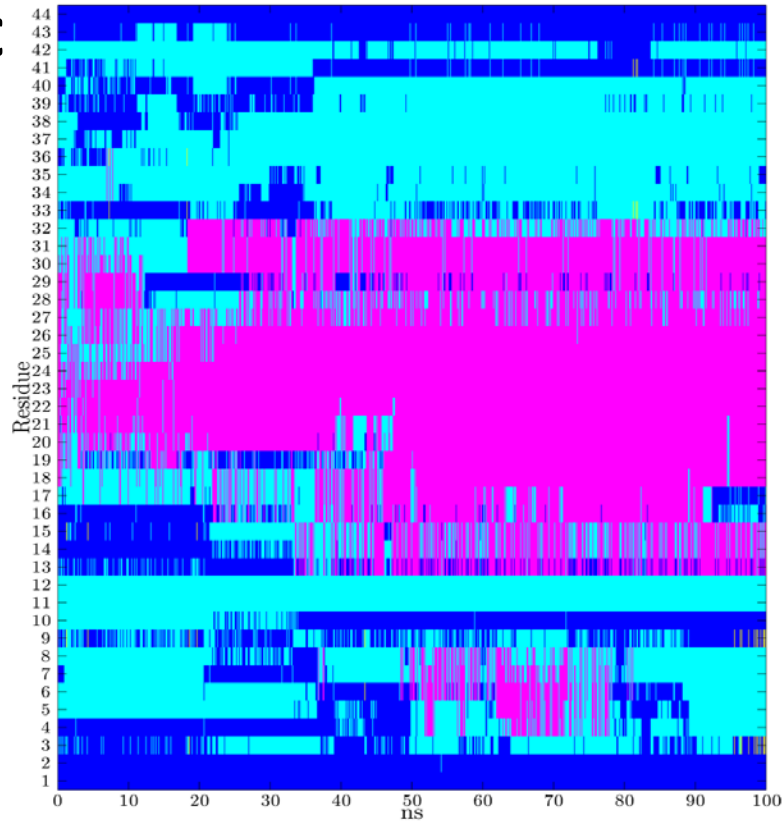

**A**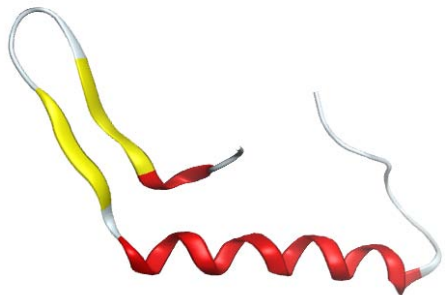**B**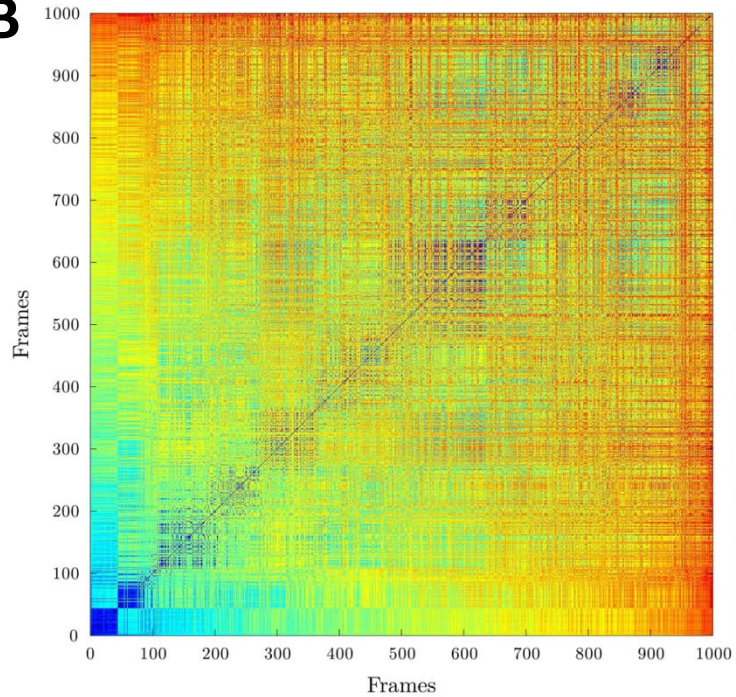

DRAMP00111

**C**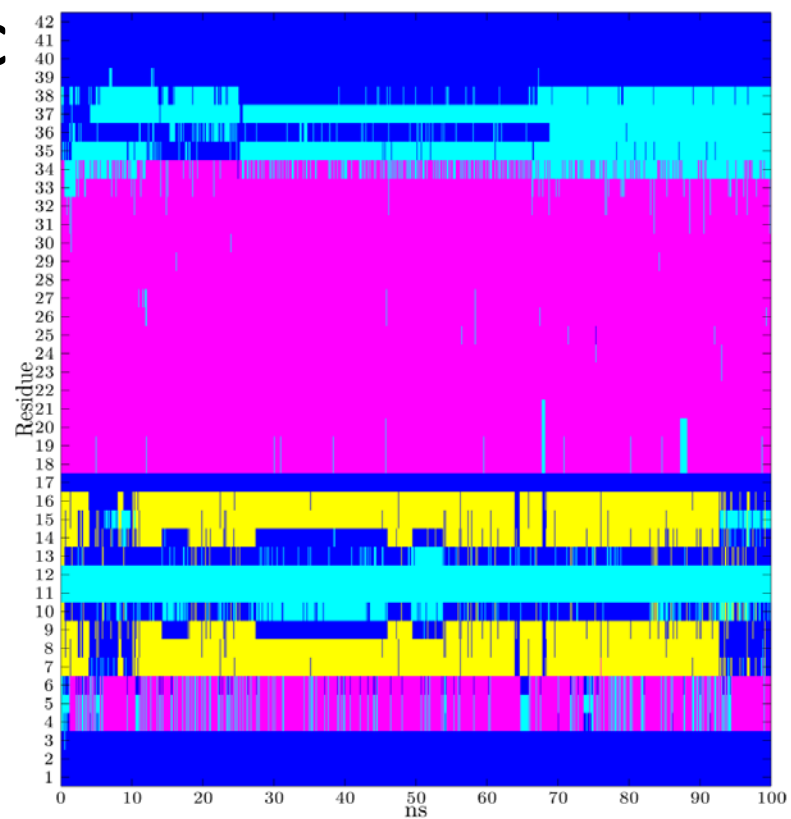

**A**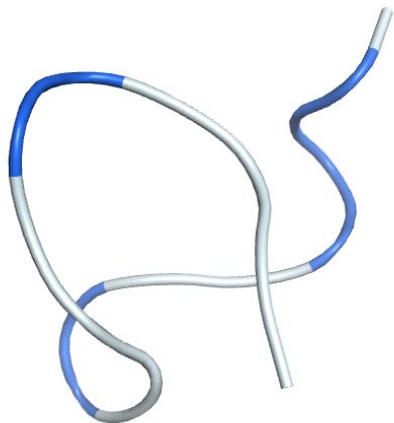**B**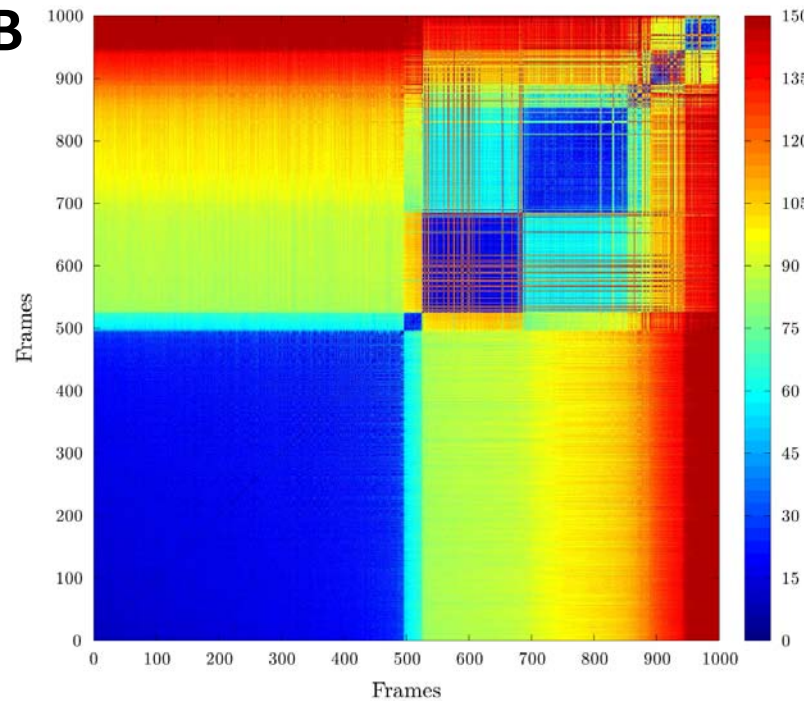**C**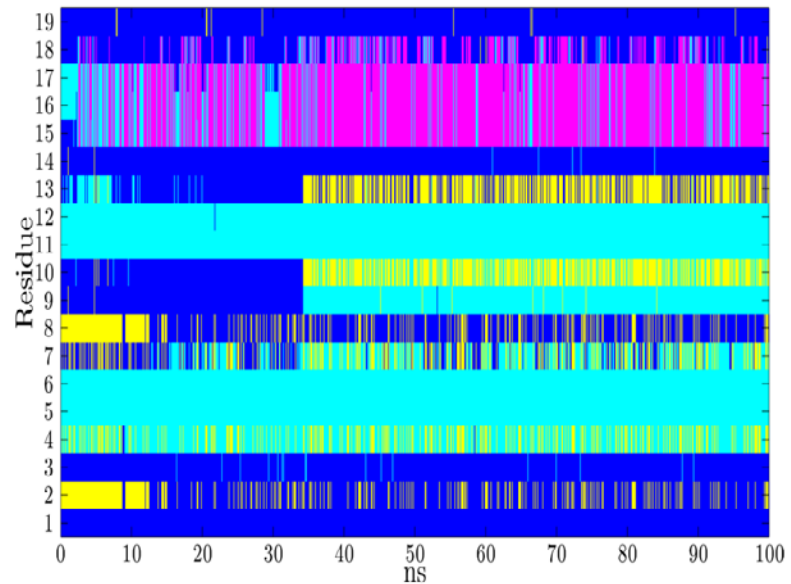

DRAMP18306



**A**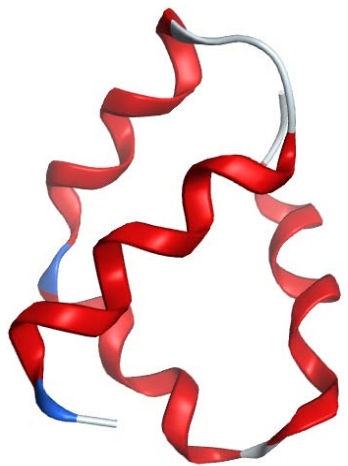**B**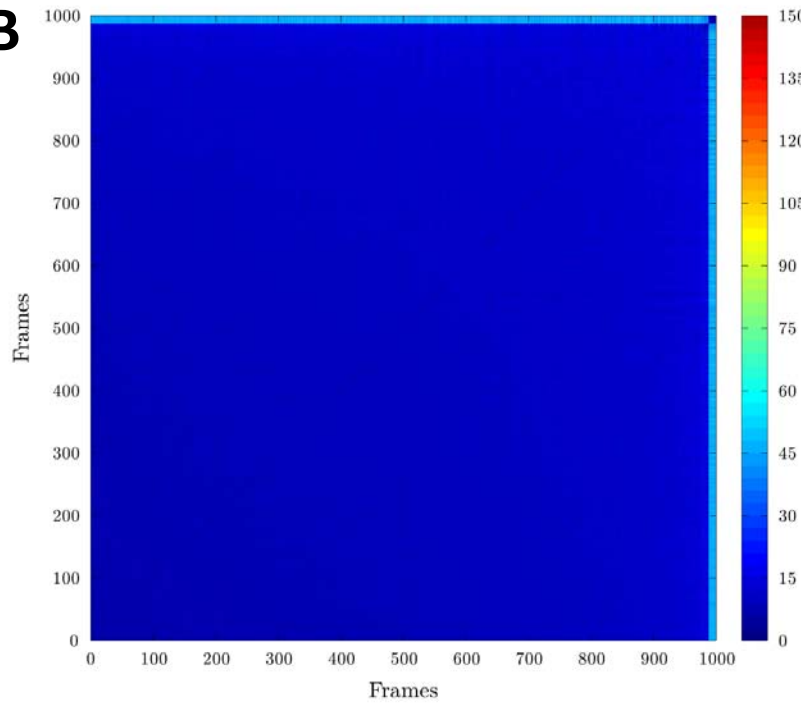

DRAMP00068

**C**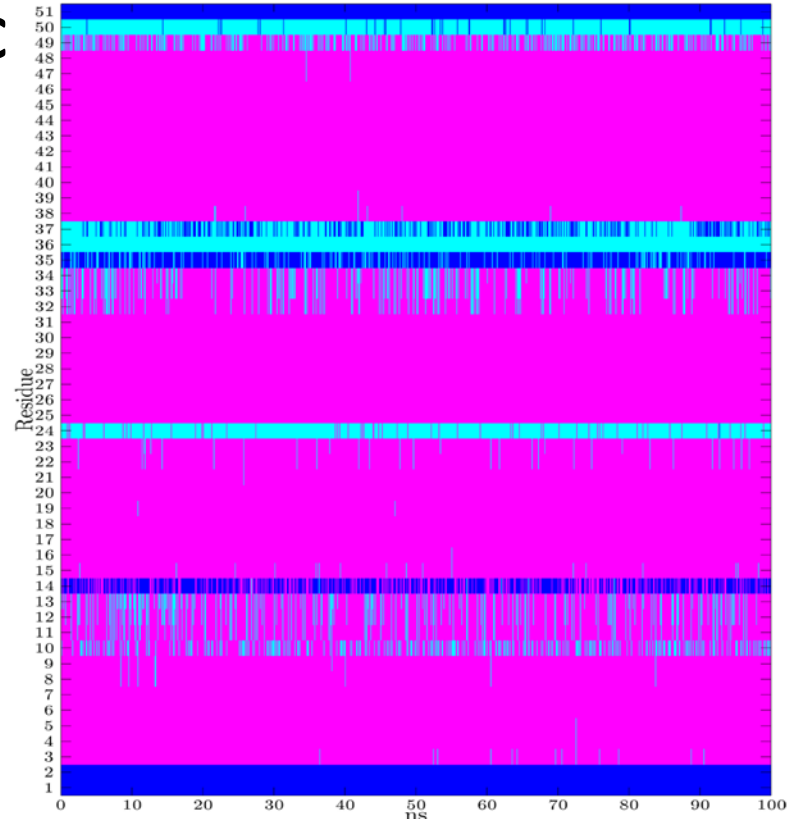

**A**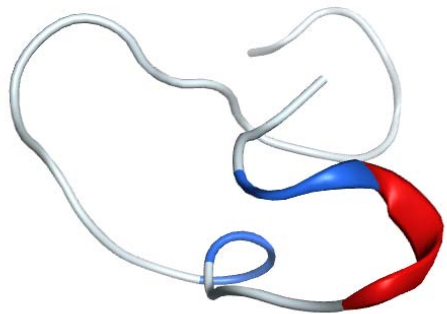**B**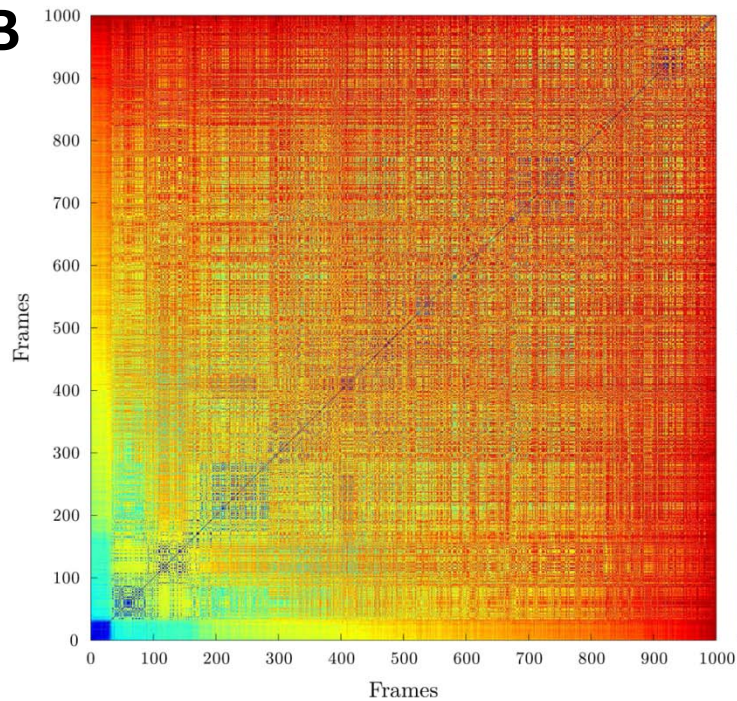

DRAMP00022

**C**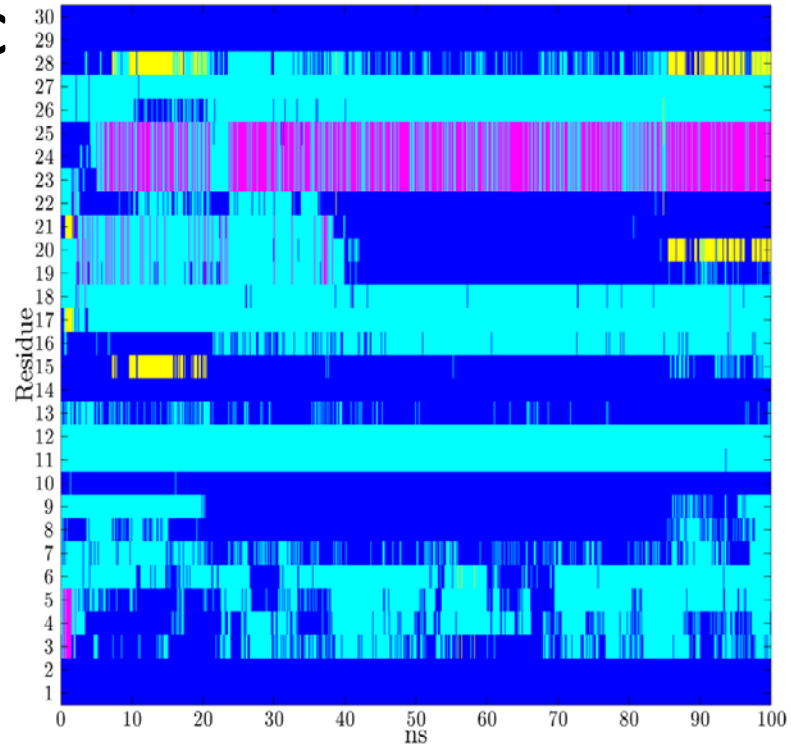

**A**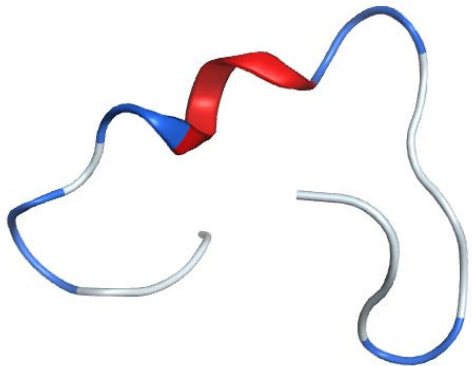**B**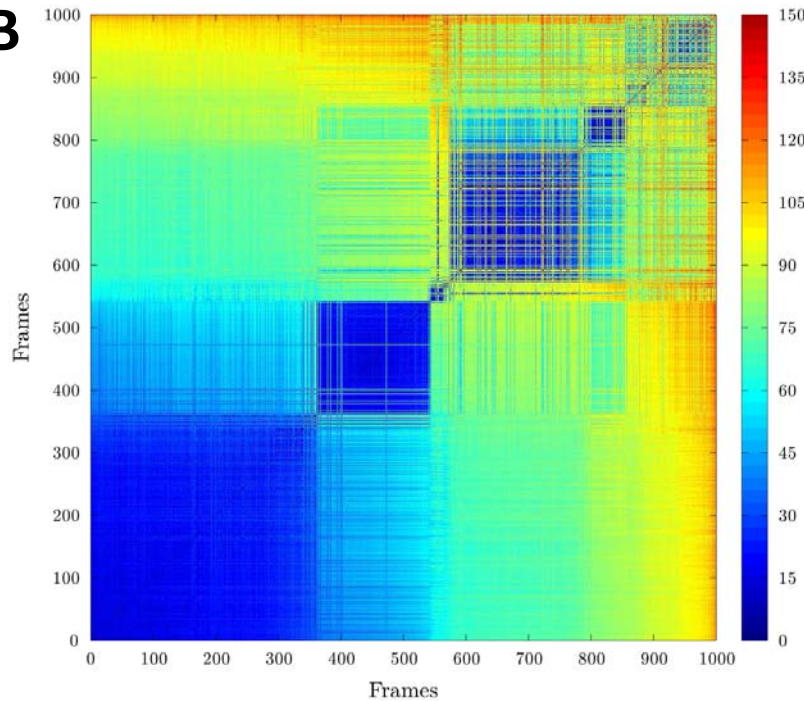

DRAMP00052

**C**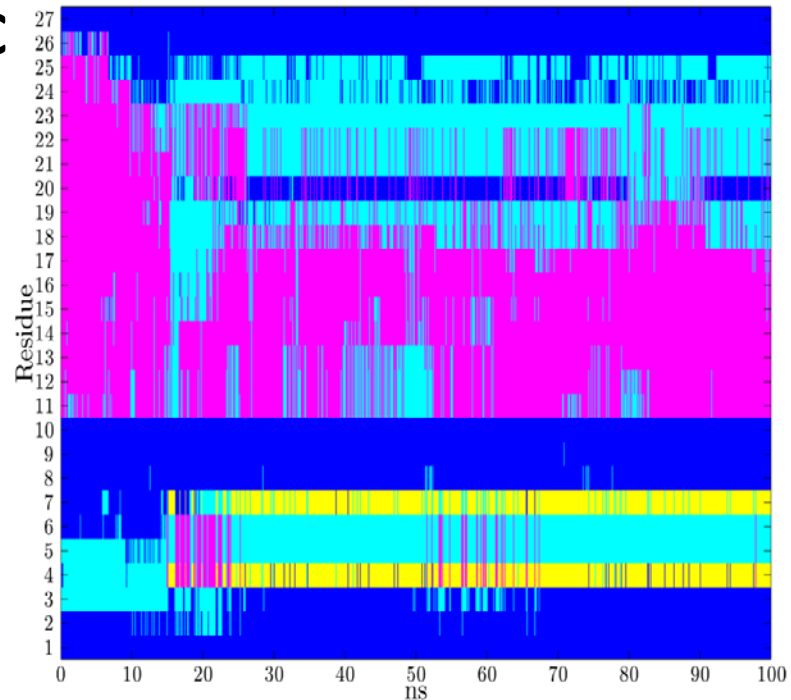

**A**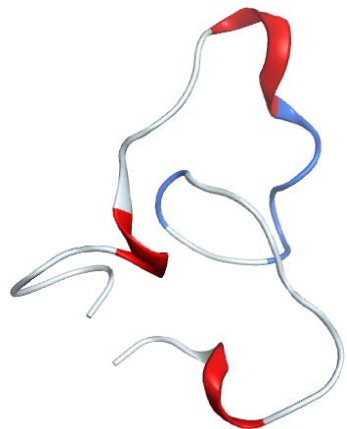**B**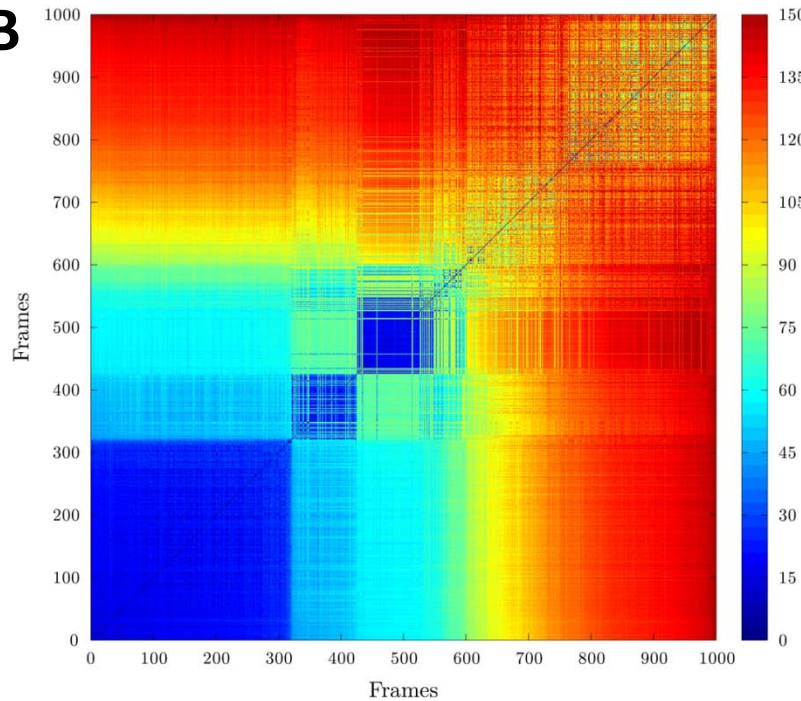

DRAMP04437

**C**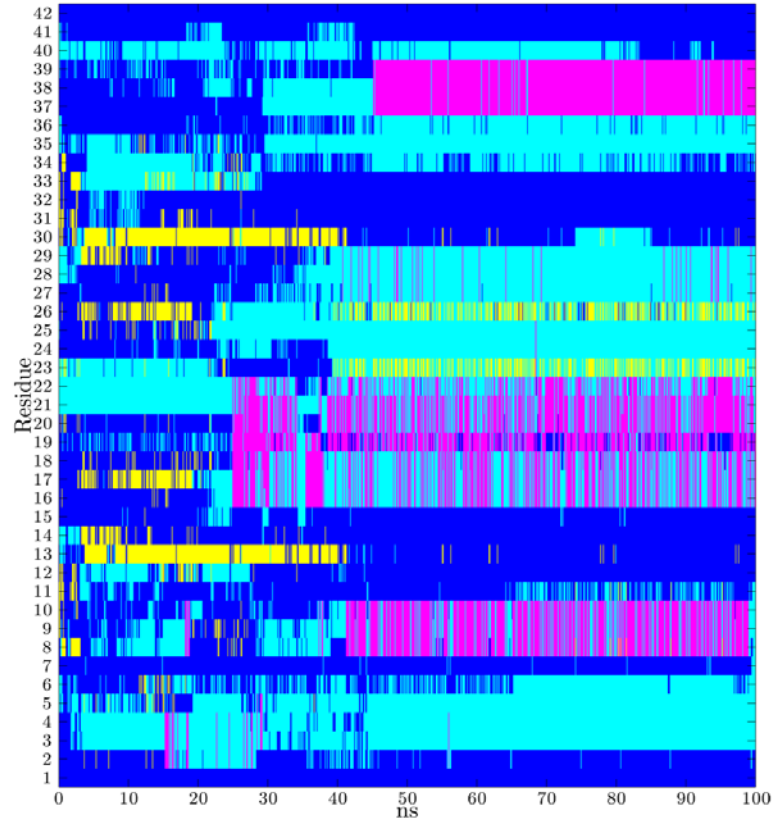



**A**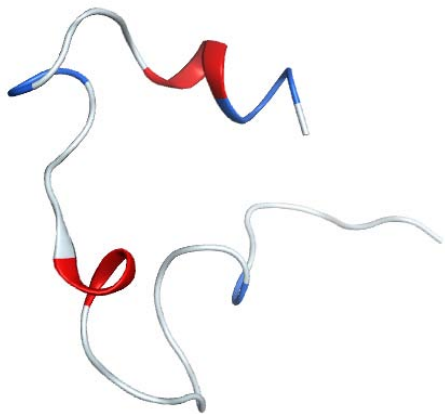**B**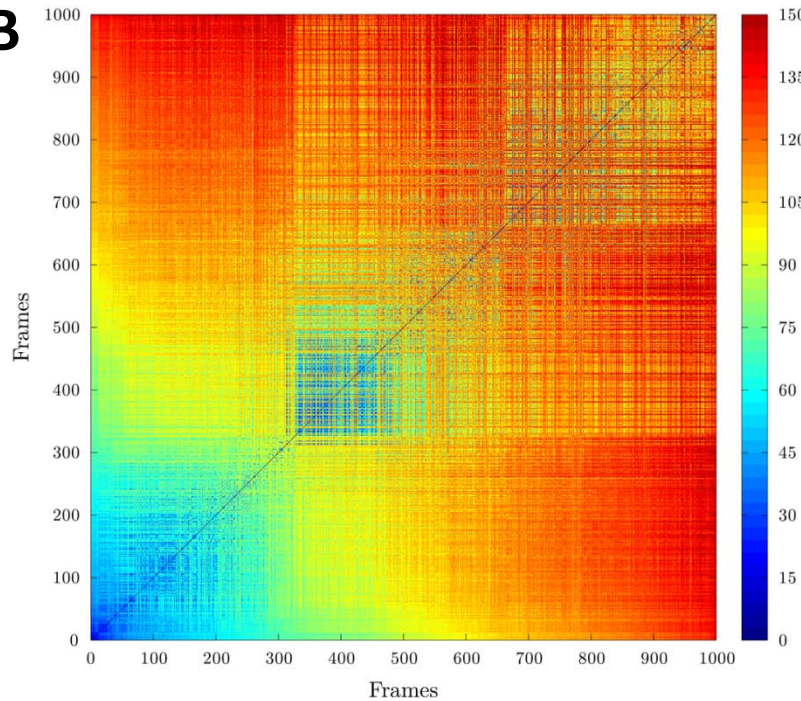

DRAMP00161

**C**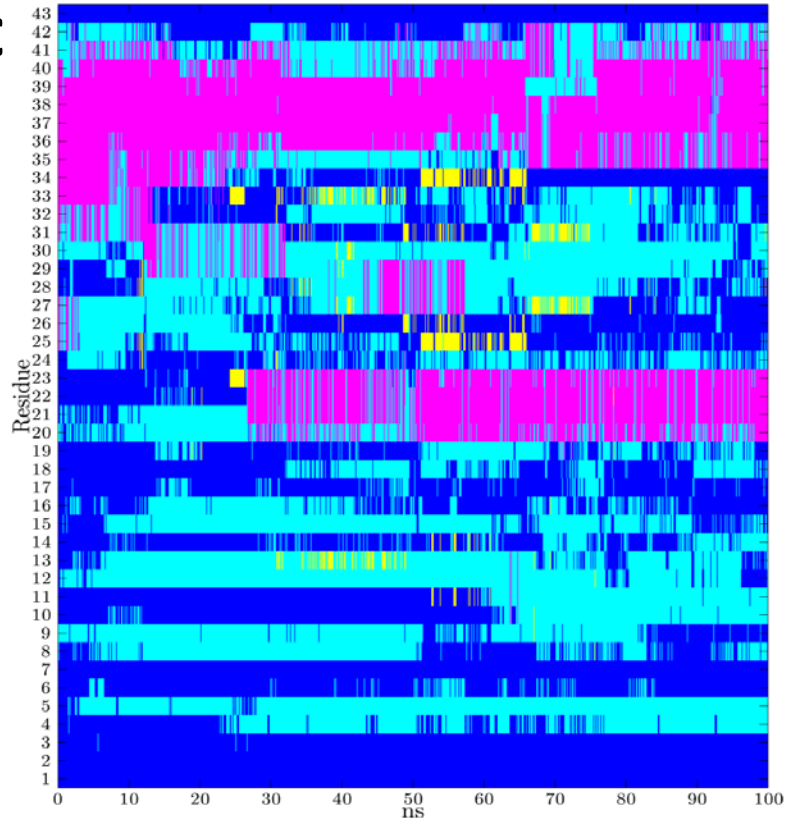

**A**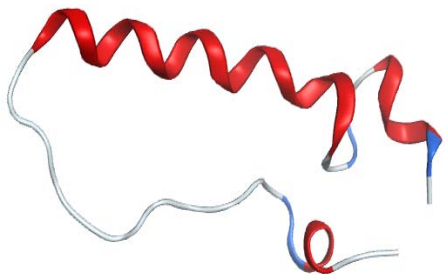**B**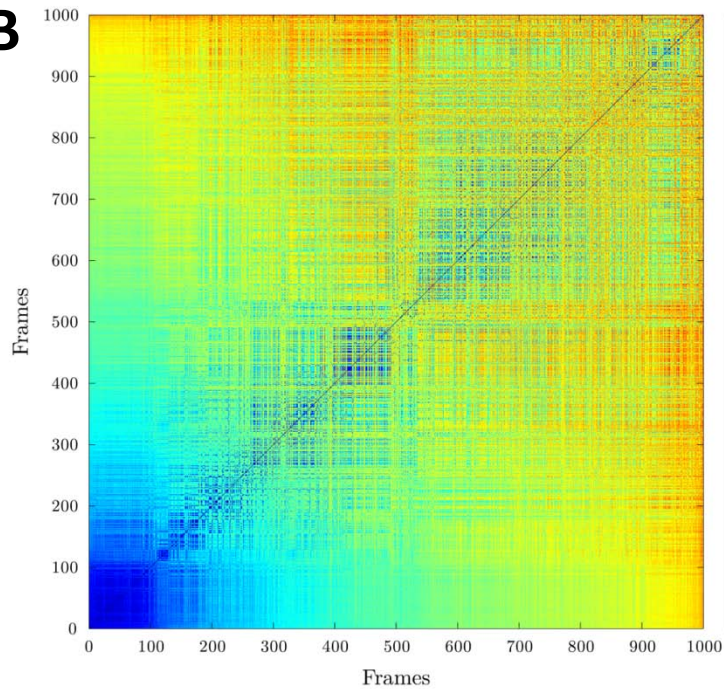

DRAMP00071

**C**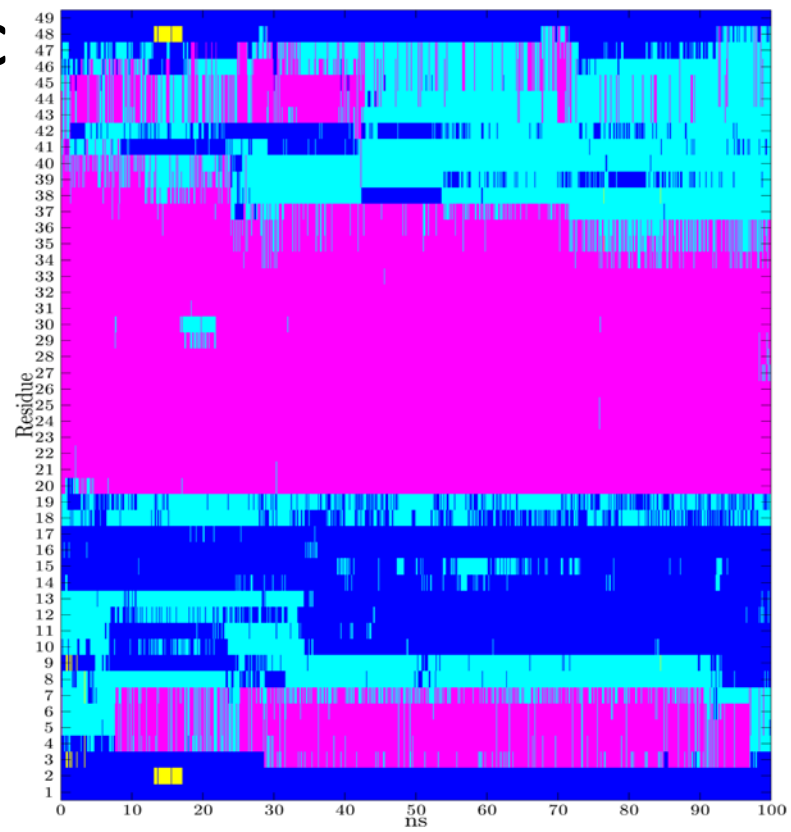

**A**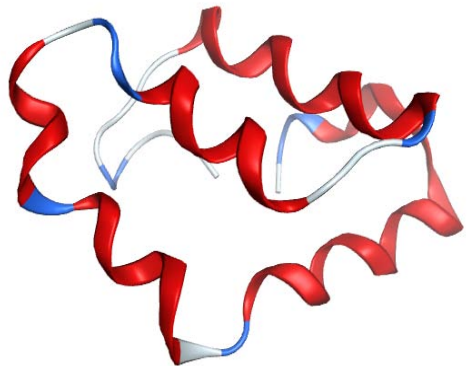**B**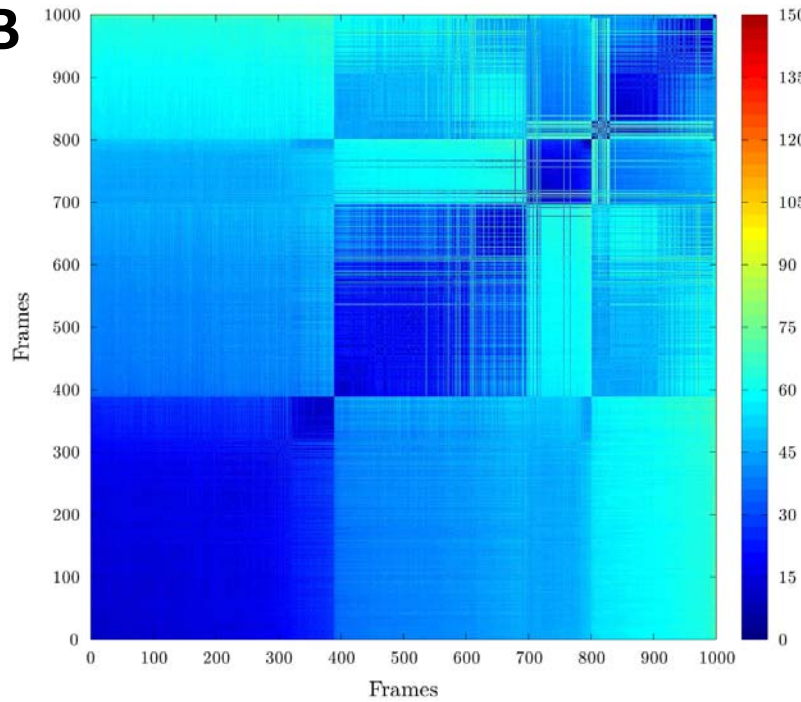

DRAMP00164

**C**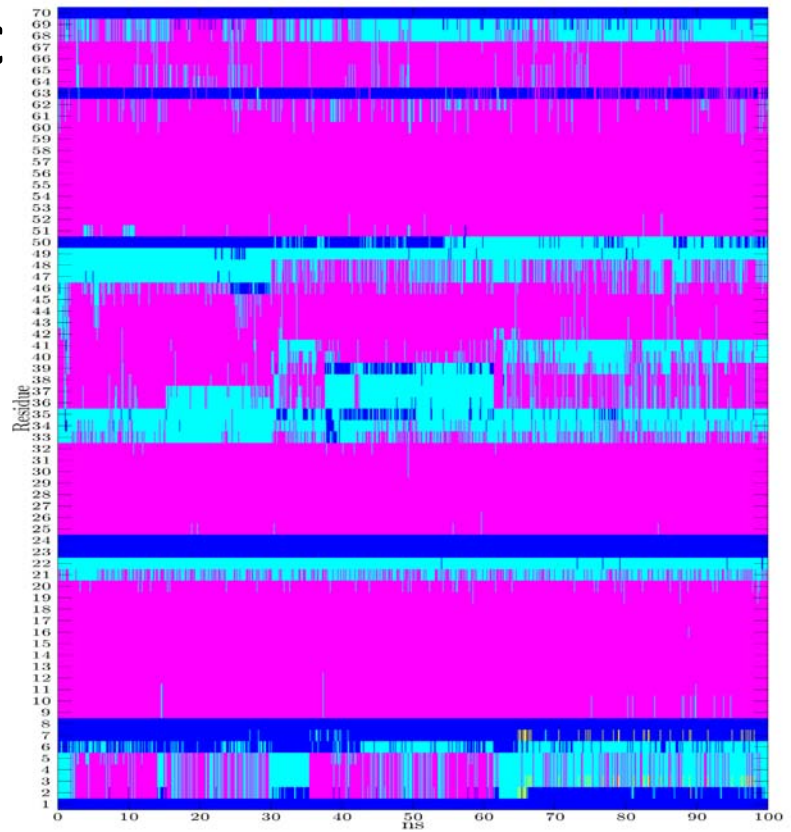



**A**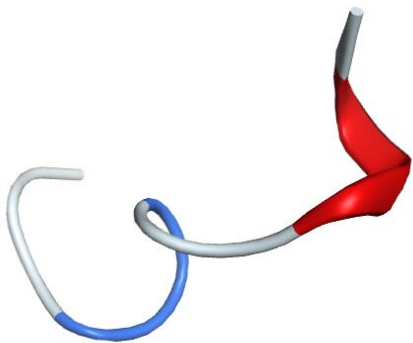**B**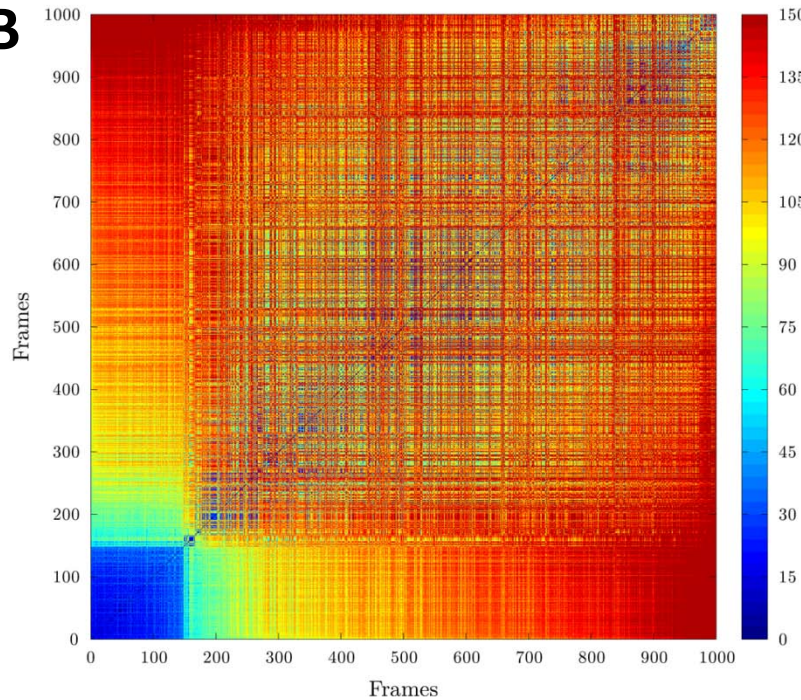**DRAMP02470****C**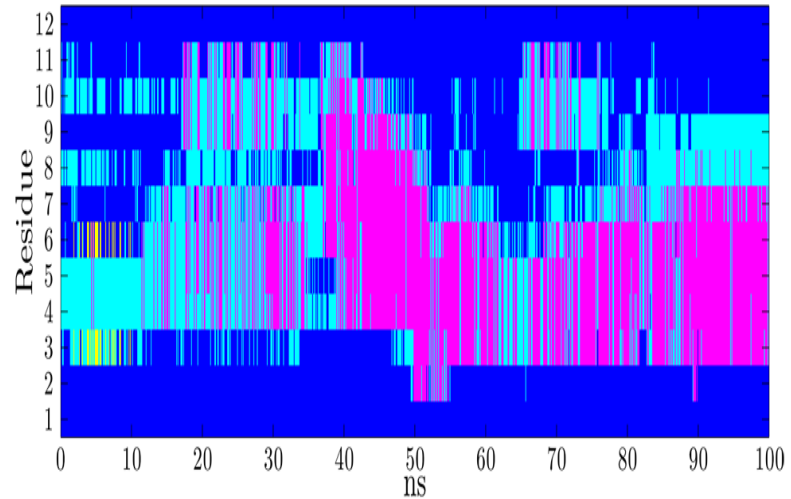



**A**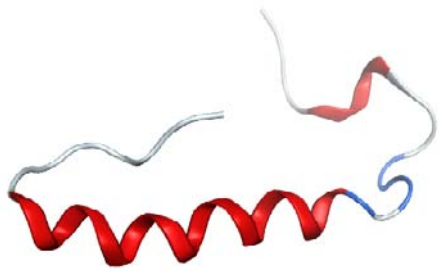**B**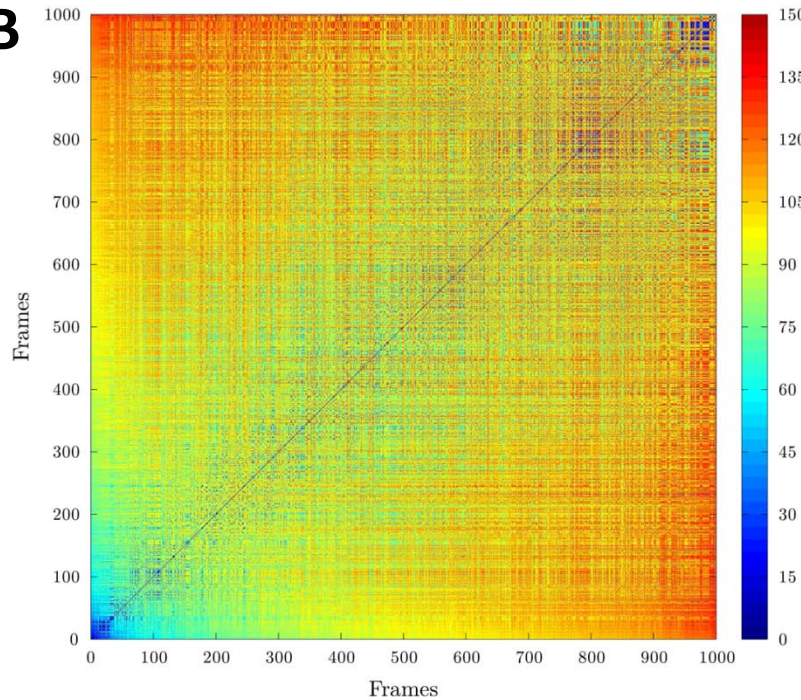

DRAMP00073

**C**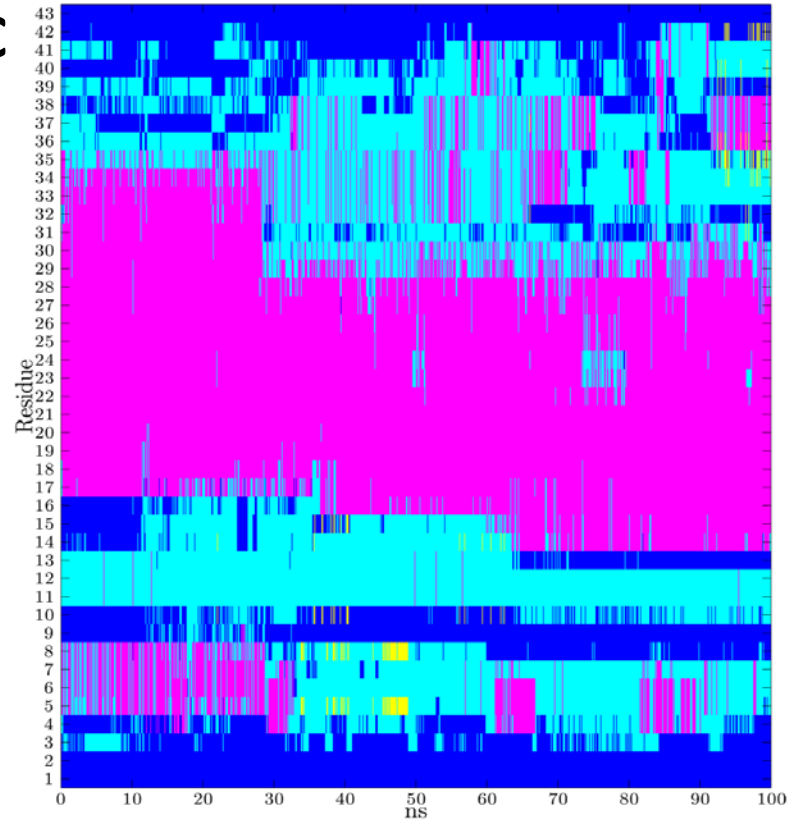

Supplement: 41598_2018_29566_MOESM1_ESM.pdf [file 41598_2018_29566_MOESM1_ESM.pdf]
